# Supplementary material for: Tackling the chemical diversity of microbial nonulosonic acids – a universal large-scale survey approach
Source: Royal Society of Chemistry journal article supplement (doi:10.1039/c9sc06406k), 2020-01-01
Supplement: c9sc06406k1.xlsx [file c9sc06406k1.xlsx]

## Sheet: 1. HIT-LIST SUMMARY
	For abbreviations and parameters see SI-table sheet-2
	Sample	Channel									Parent mass		Window	Water			Mass delta	#		RT			Known NulO			CORE				8-Carbon												9-Carbon
	Number	Hit	Class	C	H	N	O	P	S	RDBE	Hit [M]	Intensity	Score	Score	Consec	Overlap	(av, ppm)	Fragments	Total Score	(min)	AiRM-1	AiRM-2	Class	Modification		205.061	217.061	229.061	231.076	265.061	267.077	269.092	283.072	285.087	287.103	301.082	303.098	305.113	319.093	321.108	323.124	277.061	279.077	281.092	295.072	297.087	299.103	313.082	315.098
	1	0	0	0	0	0	0	0	0	0	0	0	0	0	0	0	0	0	0	0	0	0				0	0	0	0	0	0	0	0	0	0	0	0	0	0	0	0	0	0	0	0	0	0	0	0
	2	426.75	9	18	23	3	9	0	0	9	425.143	3.09808e+06	15	59.5	20.5	0.945325	-0.275037	7	114.643	11.9916	3034	x	'Neu'	'Ac'		0.452409	0.756169	1	0.141011	0	0.26557	0	0.964747	0.30611	0	0.57168	0	0	0	0	0	0	0	0	0.495887	0	0	1	0
	2	440.5	9	19	29	5	7	0	0	8	439.207	61410.2	0	4.5	1.5	0.188365	3.09023	6	2.76475	10.4069	2519	x				0.5	0.708333	1	0	0	0.520833	0	0.875	0.25	0	0.354167	0	0	0	0	0	0	0	0	0.625	0	0	1	0
	2	440.5	9	19	25	3	9	0	0	9	439.159	399400	0	32	9	0.836785	-0.0105884	6.5	53.8143	10.4072	2623	x	'Neu'	'AcMe'		0.5625	0.75	1	0.0625	0	0.625	0	0.8125	0.25	0	0.4375	0	0	0	0	0	0	0	0	0.6875	0	0	1	0
	2	443.25	9	18	23	3	10	0	0	9	441.138	4.58462e+06	6.5	67.5	13	0.92287	0.0212292	7	112.489	10.2492	2468	x	'Neu'	'Gc'		0.554007	0.783391	1	0.167828	0	0.480836	0	0.867596	0.239837	0	0.553426	0	0	0	0	0	0	0	0	0.662602	0	0	0.987805	0
	2	450.125	9	20	23	3	9	0	0	11	449.143	394376	4	8	1.5	0.398375	-0.192366	6.5	10.2194	15.677	4291	x		'Ac2-H2O'		0.8	0.8	1	0.6	0	0.9	0	0.7	0.7	0	0	0	0	0	0	0	0	0	0	1	0	0	1	0
	2	465.25	9	20	23	3	10	0	0	11	465.138	75839.5	4.5	0	2.5	0.38094	-0.242079	4	6.28727	14.3647	3880	x		'AcGc-H2O'		0	0.35	1	0	0	0.2	0	0	0	0	0	0	0	0	0	0	0	0	0	1	0	0	1	0
	2	468	9	20	25	3	10	0	0	10	467.154	1.48175e+07	24.5	69.5	18.5	0.95778	0.227655	7.5	138.327	15.6154	4193	x	'Neu'	'Ac2'		0.620621	0.693348	0.987805	0.231042	0	0.477827	0	0.568514	0.307095	0	0.25255	0	0	0	0	0	0.0181818	0	0	0.930155	0	0	0.94235	0
	2	484.5	9	20	25	3	11	0	0	10	483.149	2.78577e+06	19	47.5	16	0.86666	0.13412	7	88.3877	14.2944	3783	x	'Neu'	'AcGc'		0.444788	0.5139	1	0.139768	0	0.416216	0	0.166795	0.138224	0	0	0	0	0	0	0	0	0	0	0.985714	0	0	0.902317	0
	2	509.25	9	22	25	3	11	0	0	12	507.149	11314.8	2	0	0.5	0.16119	-1.13773	3.5	1.05194	16.213	4468	x		no ID.		0.125	0	1	0	0	0.875	0	0	0	0	0	0	0	0	0	0	0	0	0	1	0	0	1	0
	2	509.25	9	22	27	3	11	0	0	11	509.165	8.15813e+06	25.5	41	11.5	0.941435	0.287785	7	95.963	19.206	5404	x	'Neu'	'Ac3'		0.55914	0.517473	1	0.147849	0	0.734543	0	0.115591	0.263441	0	0	0	0	0	0	0	0	0	0	1	0	0	0.914651	0
	3	385.5	9	16	20	2	9	0	0	8	384.117	5.19139e+06	14	14	7	0.95257	0.129492	7	54.2513	6.20708	1199	x	'Kdn'	'base'		1	1	1	0.285714	0	0.571429	0	0.857143	0.714286	0	1	0	0	0.142857	0	0	0	0	0	0.714286	0	0	1	0
	4	385.5	9	16	20	2	9	0	0	8	384.117	4.05451e+06	5	9.5	5	0.83945	0.288402	7	30.9814	7.94035	1771	1771	'Kdn'	'base'		1	1	0.784091	0.477273	0.0454545	0.477273	0	0.602273	0.602273	0	0.693182	0	0	0	0	0	0	0	0	0.875	0	0	0.909091	0
	4	425.375	9	18	23	3	9	0	0	9	425.143	1.80943e+06	4.5	19	6	0.892275	0.0838776	7	38.6527	7.98774	1785	1786	'Neu'	'Ac'		0.692308	0.653846	1	0.346154	0.153846	0.346154	0	0.769231	0.346154	0	0.576923	0	0	0	0	0	0	0	0	0.653846	0	0	1	0
	4	441.875	9	19	25	3	9	0	0	9	439.159	1.45749e+06	2.5	2	3.5	0.87643	0.371779	5	13.1102	8.08897	1792	1843	'Neu'	'AcMe'		0.125	0.84375	1	0.125	0	0.78125	0	0.6875	0.6875	0	0.125	0	0	0	0	0	0	0	0	0.5	0	0	0.9375	0
	4	443.25	9	18	23	3	10	0	0	9	441.138	1.45441e+06	2	12	3	0.899695	0.332583	7	24.0962	7.9304	1792	1740	'Neu'	'Gc'		0.5	0.6	1	0.4	0	0.5	0	0.9	0.5	0	0.5	0	0	0	0	0	0	0	0	0.5	0	0	0.9	0
	4	448.75	9	20	23	3	9	0	0	11	449.143	130729	3	3	0.5	0.17765	-0.667715	4	2.70775	9.45772	2210	2314	'Neu'	'Ac2-H2O'		0	0.625	1	0	0	0.75	0	0	0.125	0	0	0	0	0	0	0	0	0	0	1	0	0	1	0
	4	466.625	9	20	23	3	10	0	0	11	465.138	144959	2	0	2	0.523325	-0.209314	5	5.14845	9.23577	2321	2060	'Neu'	'AcGc-H2O'		0.23913	0.26087	1	0.0869565	0	0.352174	0	0.195652	0.0869565	0	0.130435	0	0	0	0	0	0	0	0	1	0	0	0.791304	0
	4	468	9	20	25	3	10	0	0	10	467.154	6.14737e+06	32	70	19.5	0.94406	0.129668	7	142.121	9.47748	2217	2321	'Neu'	'Ac2'		0.402576	0.425926	1	0.179549	0	0.362319	0	0.345411	0.244767	0	0.151771	0	0	0	0	0	0	0	0	0.98913	0	0	0.944444	0
	4	484.5	9	20	25	3	11	0	0	10	483.149	1.46382e+06	9	30.5	10.5	0.71672	-0.0553763	7	46.7527	8.69429	1963	2067	'Neu'	'AcGc'		0.419643	0.41369	1	0.178571	0	0.372024	0	0.241071	0.178571	0	0.0208333	0	0	0	0	0	0	0	0	0.9375	0	0	0.827381	0
	4	509.25	9	22	27	3	11	0	0	11	509.165	4.75549e+06	26	41	11.5	0.90766	-0.0418627	6.5	88.7254	15.785	4312	4312	'Neu'	'Ac3'		0.338235	0.313725	1	0.183824	0	0.568627	0	0	0.0710784	0	0	0	0	0	0	0	0	0	0	1	0	0	0.781863	0
	5	426.75	9	18	23	3	9	0	0	9	425.143	292412	0	13.5	5.5	0.676135	-1.92594	5	18.7932	8.89084	2150	2046	'Neu'	'Ac'		0.481818	0.718182	1	0	0	0	0	0.818182	0	0	0.663636	0	0	0	0	0	0	0	0	0.481818	0	0	1	0
	5	426.75	9	18	24	3	9	0	0	8.5	426.151	62805	0	3	0	0.227205	-3.99037	5	2.10044	8.89084	2150	2046				0.583333	0.583333	1	0	0	0	0	0.75	0	0	0.833333	0	0	0	0	0	0	0	0	0.583333	0	0	1	0
	6	0	0	0	0	0	0	0	0	0	0	0	0	0	0	0	0	0	0	0	0	0				0	0	0	0	0	0	0	0	0	0	0	0	0	0	0	0	0	0	0	0	0	0	0	0
	7	407.5	9	18	23	3	8	0	0	9	409.149	40254.2	0	4	3.5	0.24485	3.09716	5	3.08074	8.97649	2247	1987		no ID.		0.238971	0.606618	1	0	0	0	0	0.816176	0	0	0.363971	0	0	0	0	0	0	0	0	0.238971	0	0	1	0
	7	426.75	9	18	27	5	7	0	0	8	425.191	310558	0	14.5	10.5	0.372895	2.92759	7	11.9915	8.60503	2046	1942				0.375	0.714286	1	0.0535714	0.0178571	0.0892857	0	0.839286	0.0714286	0	0.410714	0	0	0	0	0	0	0	0	0.357143	0	0	1	0
	7	426.75	9	18	23	3	9	0	0	9	425.143	2.00184e+07	3.5	82	28.5	0.961665	0.227429	7	141.265	8.4526	1942	1942	'Neu'	'Ac'		0.491185	0.738014	1	0.105784	0.0163934	0.206619	0	0.841324	0.141045	0	0.455923	0	0	0	0	0	0	0	0	0.510053	0	0.00943396	0.981132	0
	7	443.25	9	19	25	3	9	0	0	9	439.159	427338	0	3	1.5	0.61579	1.23987	3	5.08986	8.24859	1845	1895	'Neu'	'AcMe'		0	0.666667	0.833333	0.25	0	0	0	0.25	0	0	0	0	0	0	0	0	0	0	0	0	0	0	0.833333	0
	7	450.125	9	21	29	4	7	0	0	9.5	449.204	43230.9	0	2.5	1.5	0.118055	-2.05809	3	0.942101	11.4978	2887	2990				0	0	1	0	0	0	0	0	0	0	0	0	0	0	0	0	0	0	0	1	0	0	0.75	0
	7	450.125	9	20	26	4	8	0	0	10	450.175	139623	0	2.5	0.5	0.13235	-4.50336	3	0.95152	11.4978	2887	2990	'Pse'	'Ac2'		0	0	1	0	0	0	0	0	0	0	0	0	0	0	0	0	0	0	0	1	0	0	0.9	0
	7	468	9	20	25	3	10	0	0	10	467.154	590491	0	17	6	0.70434	-0.556348	5	23.1178	11.597	2945	2997	'Neu'	'Ac2'		0.244318	0.491477	1	0	0	0.400568	0	0.0909091	0	0	0	0	0	0	0	0	0	0	0	1	0	0	1	0
	8	0	0	0	0	0	0	0	0	0	0	0	0	0	0	0	0	0	0	0	0	0				0	0	0	0	0	0	0	0	0	0	0	0	0	0	0	0	0	0	0	0	0	0	0	0
	9	0	0	0	0	0	0	0	0	0	0	0	0	0	0	0	0	0	0	0	0	0				0	0	0	0	0	0	0	0	0	0	0	0	0	0	0	0	0	0	0	0	0	0	0	0
	10	0	0	0	0	0	0	0	0	0	0	0	0	0	0	0	0	0	0	0	0	0				0	0	0	0	0	0	0	0	0	0	0	0	0	0	0	0	0	0	0	0	0	0	0	0
	11	0	0	0	0	0	0	0	0	0	0	0	0	0	0	0	0	0	0	0	0	0				0	0	0	0	0	0	0	0	0	0	0	0	0	0	0	0	0	0	0	0	0	0	0	0
	12	385.5	9	16	20	2	9	0	0	8	384.117	1.29986e+07	25	25	13	0.95934	0.208947	7	92.0576	9.051	2135	2135	'Kdn'	'base'		1	1	0.92	0.24	0	0.36	0	0.68	0.6	0	0.84	0	0	0	0	0	0	0	0	0.68	0	0	1	0
	12	424	9	18	21	3	9	0	0	10	423.128	221382	1	7	3	0.79675	-0.613763	7	16.5698	9.09953	2149	2149	'Neu'	'Gc-H2O'		0.333333	0.5	1	0.333333	0	0.333333	0	0.833333	0	0	0.333333	0	0	0	0	0	0	0	0	0.5	0	0	1	0
	12	426.75	9	18	23	3	9	0	0	9	425.143	3.42064e+06	10	32	13	0.95251	0.622237	7	71.393	9.4207	2254	2254	'Neu'	'Ac'		0.6	0.7	1	0.2	0.2	0.4	0	0.9	0.2	0	0.7	0	0	0	0	0	0	0	0	0.6	0	0	1	0
	12	440.5	9	19	25	3	9	0	0	9	439.159	949125	0	12	4	0.89217	0.267329	7	26.6689	9.11647	2155	2155	'Neu'	'AcMe'		0.666667	0.666667	1	0.333333	0	0.666667	0	0.666667	0.666667	0	0.333333	0	0	0	0	0	0	0	0	0.666667	0	0	1	0
	12	440.5	9	18	23	3	10	0	0	9	441.138	4.31605e+06	12	32	7	0.94674	0.159587	7	65.2746	9.11647	2155	2155	'Neu'	'Gc'		0.545455	0.636364	1	0.181818	0	0.454545	0	0.681818	0.363636	0	0.454545	0	0	0	0	0	0	0	0	0.545455	0	0	1	0
	12	448.75	9	20	23	3	9	0	0	11	449.143	363514	7	0	1	0.35733	-0.294338	6	5.1303	11.5288	2938	2938	'Neu'	'Ac2-H2O'		0.4	0.6	1	0.2	0	0.4	0	0	0	0	0	0	0	0	0	0	0	0	0	1	0	0	0.9	0
	12	465.25	9	20	23	3	10	0	0	11	465.138	229661	4	0	4	0.7922	0.610571	5	10.9262	10.2618	2528	2528	'Neu'	'AcGc-H2O'		0	0.666667	1	0.222222	0	0.666667	0	0	0	0	0	0	0	0	0	0	0	0	0	1	0	0	1	0
	12	468	9	20	25	3	10	0	0	10	467.154	5.64011e+06	31	68	20	0.94129	0.162345	7	143.962	11.3881	2893	2893	'Neu'	'Ac2'		0.604651	0.604651	1	0.186047	0	0.55814	0	0.581395	0.372093	0	0.139535	0	0	0	0	0.0465116	0	0	0	0.976744	0	0	0.930233	0
	12	484.5	9	20	25	3	11	0	0	10	483.149	3.67348e+06	15	31	9	0.90973	0.513113	7	66.3282	10.2815	2535	2535	'Neu'	'AcGc'		0.47619	0.571429	1	0.380952	0	0.380952	0	0.380952	0.380952	0	0.190476	0	0	0	0	0	0	0	0	0.904762	0	0	0.952381	0
	12	492.75	9	22	25	3	10	0	0	12	491.154	113176	2	2	1	0.43687	0.0301331	6	5.87017	17.1688	4774	4774	'Neu'	'Ac3-H2O'		1	1	1	1	0	1	0	0	0	0	0	0	0	0	0	0	0	0	0	1	0	0	1	0
	12	509.25	9	22	27	3	11	0	0	11	509.165	6.74066e+06	25	46	12	0.93531	0.437638	8	100.953	17.0318	4728	4728	'Neu'	'Ac3'		0.533333	0.466667	1	0.2	0	0.666667	0	0.0666667	0.2	0	0	0	0	0	0	0	0.0666667	0	0	1	0	0	0.933333	0
	13	385.5	9	16	20	2	9	0	0	8	384.117	4.44244e+06	10	10	5	0.857455	0.76508	7	37.1484	8.39434	1927	1927	'Kdn'	'base'		1	1	0.916667	0.416667	0.166667	0.541667	0	0.708333	0.625	0	0.916667	0	0	0	0	0	0	0	0	0.916667	0	0	0.916667	0
	13	426.75	9	18	21	3	9	0	0	10	423.128	109592	0	7	1	0.62894	-0.577367	7	12.1166	8.60497	1942	2046				0.775	0.816667	1	0.225	0	0.55	0	0.875	0.55	0	0.633333	0	0	0	0	0	0	0	0	0.633333	0	0	1	0
	13	426.75	9	18	23	3	9	0	0	9	425.143	3.1589e+06	1	22	4.5	0.83899	0.047972	7	36.3662	8.60497	1942	2046	'Neu'	'Ac'		0.798077	0.822115	1	0.201923	0	0.480769	0	0.875	0.480769	0	0.620192	0	0	0	0	0	0	0	0	0.543269	0	0	1	0
	13	441.875	9	19	25	3	9	0	0	9	439.159	438511	0	7	2	0.90309	1.03129	5.5	15.6873	8.54092	1999	1948	'Neu'	'AcMe'		0.125	0.875	1	0.75	0	0.25	0	0.375	0.75	0	0.25	0	0	0	0	0	0	0	0	0.25	0	0	1	0
	13	443.25	9	18	23	3	10	0	0	9	441.138	710967	4.5	12	3.5	0.86755	0.851434	6.5	26.866	8.46291	1948	1948	'Neu'	'Gc'		0.439394	0.780303	1	0.340909	0	0.431818	0	0.689394	0.431818	0	0.515152	0	0	0	0	0	0	0	0	0.606061	0	0	1	0
	13	468	9	20	23	3	10	0	0	11	465.138	120659	5	0	4.5	0.695675	-0.898518	7	11.9821	10.411	2581	2581				0.5	0.525	0.95	0.25	0	0.425	0	0.375	0.275	0	0.075	0	0	0	0	0	0	0	0	1	0	0	0.95	0
	13	468	9	20	25	3	10	0	0	10	467.154	4.69916e+06	17	59.5	16	0.91696	0.42364	7	111.232	10.3307	2529	2581	'Neu'	'Ac2'		0.533333	0.585897	1	0.124359	0	0.425641	0	0.337179	0.267949	0	0.126923	0	0	0	0	0	0	0	0	0.966667	0	0	0.841667	0
	13	484.5	9	21	27	3	10	0	0	10	481.17	180087	1.5	0	4.5	0.911575	0.549494	7	12.6819	9.54615	2275	2327	'Neu'	'Ac2Me'		0.654762	0.660714	1	0.244048	0	0.494048	0	0.428571	0.267857	0	0.077381	0	0	0	0	0	0	0	0	0.916667	0	0	0.892857	0
	13	484.5	9	20	25	3	11	0	0	10	483.149	1.48e+06	2.5	24.5	7.5	0.861955	0.92369	7	43.4537	9.46623	2223	2327	'Neu'	'AcGc'		0.608456	0.547794	1	0.238971	0	0.488971	0	0.393382	0.242647	0	0.0900735	0	0	0	0	0	0	0	0	1	0	0	0.847426	0
	13	509.25	9	22	27	3	11	0	0	11	509.165	5.08081e+06	25	37	9	0.92533	0.527531	7	83.2345	16.7807	4624	4676	'Neu'	'Ac3'		0.226496	0.284188	1	0.150997	0	0.566952	0	0	0.0384615	0	0	0	0	0	0	0	0	0	0	1	0	0	0.773504	0
	14	385.5	9	16	20	2	9	0	0	8	384.117	1.21889e+06	7	7	3.5	0.83141	0.367857	7	26.8315	8.16802	1875	1823	'Kdn'	'base'		1	1	0.708333	0.291667	0	0.458333	0	0.458333	0.458333	0	0.75	0	0	0	0	0	0	0	0	0.583333	0	0	1	0
	14	426.75	9	18	23	3	9	0	0	9	425.143	656417	3	14	3	0.51372	0.406921	7	17.5739	8.37987	1994	1838	'Neu'	'Ac'		1	0.9	1	0.266667	0	0.333333	0	1	0.166667	0	0.733333	0	0	0	0	0	0	0	0	0.733333	0	0	1	0
	14	440.5	9	19	25	3	9	0	0	9	439.159	87573	0	4	1	0.530115	0.581224	5.5	6.89358	8.23503	1895	1843	'Neu'	'AcMe'		1	1	1	0.5	0	0.5	0	1	0.5	0	0.5	0	0	0	0	0	0	0	0	0.5	0	0	1	0
	14	440.5	9	18	23	3	10	0	0	9	441.138	229084	1	3	1	0.74976	0.540307	5.5	10.2035	8.23503	1895	1843	'Neu'	'Gc'		1	1	1	0.25	0	0.5	0	1	0.25	0	0.5	0	0	0	0	0	0	0	0	0.5	0	0	1	0
	14	468	9	20	25	3	10	0	0	10	467.154	911058	15.5	27.5	8.5	0.83168	0.260407	5	55.1899	10.3486	2685	2425	'Neu'	'Ac2'		0.282738	0.407738	1	0	0	0.345238	0	0.125	0.047619	0	0	0	0	0	0	0	0	0	0	1	0	0	0.897321	0
	14	484.5	9	20	25	3	11	0	0	10	483.149	225904	5.5	7	3.5	0.635085	-0.403395	5	18.2202	9.16115	2327	2015	'Neu'	'AcGc'		0.425	0.425	1	0	0	0.1	0	0	0	0	0	0	0	0	0	0	0	0	0	0.875	0	0	0.9	0
	14	509.25	9	22	27	3	11	0	0	11	509.165	666089	9	11	3	0.709075	-0.0419314	4	20.9332	16.5583	4572	4572	'Neu'	'Ac3'		0.162338	0	1	0	0	0.142857	0	0	0	0	0	0	0	0	0	0	0	0	0	1	0	0	0.909091	0
	15	385.5	9	16	20	2	9	0	0	8	384.117	376894	4	4	2	0.64211	0.685599	7	13.8979	8.09318	1823	1823	'Kdn'	'base'		1	1	1	0.5	0	0.75	0	0.75	0.5	0	1	0	0	0	0	0	0	0	0	1	0	0	1	0
	15	426.75	9	18	23	3	9	0	0	9	425.143	218899	6	10	3	0.39864	0.227453	4.5	11.1117	8.30541	1942	1838	'Neu'	'Ac'		0.666667	0.666667	1	0	0	0	0	1	0	0	0.5	0	0	0	0	0	0	0	0	0.333333	0	0	1	0
	15	440.5	9	19	25	3	9	0	0	9	439.159	41869.3	0	3.5	1	0.34257	0.685401	3.5	3.561	8.16011	1843	1843	'Neu'	'AcMe'		0	1	1	0	0	0	0	0.5	0	0	0	0	0	0	0	0	0	0	0	0.5	0	0	1	0
	15	443.25	9	18	23	3	10	0	0	9	441.138	83285.6	2	3	1	0.504955	0.436258	4.5	6.4979	8.16293	1844	1844	'Neu'	'Gc'		0.25	1	1	0	0	0	0	0.75	0	0	0.25	0	0	0	0	0	0	0	0	0.75	0	0	1	0
	15	468	9	20	25	3	10	0	0	10	467.154	196753	8	10	3.5	0.645375	0.0645397	3.5	18.2072	10.3534	2685	2425	'Neu'	'Ac2'		0.0909091	0	1	0	0	0	0	0	0	0	0	0	0	0	0	0	0	0	0	1	0	0	0.954545	0
	15	484.5	9	20	25	3	11	0	0	10	483.149	48198.2	1.5	0	0.5	0.38467	-1.22426	4	2.65481	9.24672	2275	2119	'Neu'	'AcGc'		0.625	0.375	0.75	0	0	0	0	0	0	0	0	0	0	0	0	0	0	0	0	1	0	0	0.75	0
	15	509.25	9	22	27	3	11	0	0	11	509.165	94333.3	2	1	0.5	0.52139	0.616991	3	4.39139	16.4052	4520	4520	'Neu'	'Ac3'		0	0	1	0	0	0	0	0	0	0	0	0	0	0	0	0	0	0	0	1	0	0	0.75	0
	16	385.5	9	16	20	2	9	0	0	8	384.117	2.71741e+06	9	9	4.5	0.80022	0.288389	7	31.4331	8.64647	1979	2031	'Kdn'	'base'		1	1	1	0.45	0.25	0.55	0	0.8	0.675	0	0.9	0	0	0	0	0	0	0	0	0.9	0	0	1	0
	16	426.75	9	18	23	3	9	0	0	9	425.143	1.08942e+06	4	21	6	0.84694	0.0839481	6	36.8792	9.09393	2150	2150	'Neu'	'Ac'		0.7	0.8	1	0	0	0.133333	0	0.8	0.0666667	0	0.6	0	0	0	0	0	0	0	0	0.4	0	0	1	0
	16	443.25	9	18	23	3	10	0	0	9	441.138	708558	4.5	11.5	2.5	0.882955	0.436371	6.5	27.392	8.63544	2000	2000	'Neu'	'Gc'		0.944444	0.944444	1	0.222222	0	0.733333	0	0.944444	0.222222	0	0.677778	0	0	0	0	0	0	0	0	0.833333	0	0	1	0
	16	468	9	20	25	3	10	0	0	10	467.154	3.03667e+06	26.5	45.5	13	0.912535	0.097013	7	98.4335	11.9438	3049	3101	'Neu'	'Ac2'		0.425647	0.588362	1	0.159483	0	0.525862	0	0.345905	0.266164	0	0.0517241	0	0	0	0	0	0	0	0	1	0	0	0.840517	0
	16	484.5	9	20	25	3	11	0	0	10	483.149	783828	4	20	6	0.84533	0.418298	6	37.9076	10.195	2483	2535	'Neu'	'AcGc'		0.720779	0.720779	1	0	0	0.558442	0	0.305195	0.0714286	0	0.0909091	0	0	0	0	0	0	0	0	1	0	0	0.964286	0
	16	509.25	9	22	27	3	11	0	0	11	509.165	2.5863e+06	17.5	23.5	7	0.86144	2.05586	7	54.1296	17.5072	4884	4884	'Neu'	'Ac3'		0.313725	0.346405	0.972222	0.20098	0	0.772876	0	0	0	0	0	0	0	0	0	0	0.0555556	0	0	1	0	0	0.857843	0
	17	407.5	9	19	24	3	7	0	0	9.5	406.161	17528.2	2	0	0.5	0.303035	-0.451914	6.5	2.92214	8.5849	2871	1103				0.857143	0.928571	1	0.0714286	0	0.0714286	0	0.928571	0.142857	0	0.5	0	0	0	0	0	0	0	0	0.714286	0	0	1	0
	17	407.5	9	20	26	2	7	0	0	9	406.174	27439.1	9	0	2.5	0.319455	-0.15806	5.5	5.63728	8.75298	3183	895				0.3	0.7	1	0	0	0	0	0.9	0	0	0.333333	0	0	0	0	0	0	0	0	0.3	0	0	1	0
	17	407.5	9	17	19	4	8	0	0	10.5	407.12	10330.9	2.5	0	0	0.279455	-2.66629	6.5	2.59324	10.8913	3391	2091		'Neu-H2O'		1	1	1	0.25	0	0.25	0	1	0.5	0	0.875	0	0	0	0	0	0	0	0	1	0	0	1	0
	17	424	9	18	21	3	9	0	0	10	423.128	531709	5	15	4	0.29095	-0.32515	7	9.97576	8.92632	2097	2097	'Neu'	'NeuGC-H2O'		0.772222	0.644444	1	0.544444	0.0277778	0.644444	0	0.872222	0.544444	0	0.694444	0	0	0	0	0	0	0	0	0.622222	0	0	1	0
	17	425.375	9	17	19	4	9	0	0	10.5	423.115	25125.6	1	0	0.5	0.227845	-4.10126	7	1.95261	9.63695	2670	1993				1	0.966667	1	0.766667	0	0.866667	0	1	0.8	0	0.933333	0	0	0	0	0	0	0	0	1	0	0	1	0
	17	425.375	9	18	23	3	9	0	0	9	425.143	9.21634e+07	148	380	102.5	0.249025	-2.24904	7	206.599	9.55978	2201	2410	'Neu'	'Ac'		0.862713	0.933548	0.995215	0.298687	0.0491043	0.53139	0	0.969367	0.535774	0	0.89062	0	0	0	0	0	0	0	0	0.831612	0	0.00478469	0.990431	0
	17	440.5	9	19	25	3	9	0	0	9	439.159	408423	11.5	29	9.5	0.16324	-1.08776	6	11.9791	11.7306	2207	3819	'Neu'	'AcMe'		0.618056	0.611111	0.944444	0.0416667	0	0.0416667	0	0.611111	0.0833333	0	0.451389	0	0	0	0	0	0	0	0	0.333333	0	0	1	0
	17	443.25	9	18	23	3	10	0	0	9	441.138	6.46743e+06	16	40	11	0.794495	-0.151721	7	66.1983	8.86635	2104	2052	'Neu'	'Gc'		0.55235	0.616453	0.980769	0.292735	0.0555556	0.306624	0	0.792735	0.334402	0	0.423077	0	0	0	0	0	0	0	0	0.395299	0	0	1	0
	17	450.125	9	20	23	3	9	0	0	11	449.143	2.33844e+06	21	33.5	5.5	0.751455	-0.226364	7	56.8785	12.7711	3406	3303		'Ac2-H2O'		0.710445	0.887097	1	0.503072	0	0.887097	0	0.390937	0.59063	0	0	0	0	0	0	0	0	0	0	1	0	0	0.967742	0
	17	466.625	9	20	23	3	10	0	0	11	465.138	30776.5	2	0	3.5	0.50602	-0.470232	4.5	7.20269	11.9876	3413	2788		'AcGc-H2O'		0.352941	0.352941	1	0.352941	0	0.352941	0	0.352941	0.323529	0	0.294118	0	0	0	0	0	0	0	0	1	0	0	0.382353	0
	17	468	9	20	25	3	10	0	0	10	467.154	2.75378e+07	41	85	21.5	0.9754	0.064346	7	181.886	12.789	3413	3309	'Neu'	'Ac2'		0.60119	0.71875	1	0.293651	0	0.508929	0	0.474206	0.376984	0	0.259425	0	0	0	0	0	0	0	0	1	0	0	0.955357	0
	17	484.5	9	20	25	3	11	0	0	10	483.149	259622	6	6.5	2.5	0.448185	-0.749769	4	9.77741	11.1261	2847	2795	'Neu'	'AcGc'		0.146465	0.111111	1	0	0	0.0555556	0	0.222222	0	0	0	0	0	0	0	0	0	0	0	0.676768	0	0	1	0
	18	407.5	9	18	21	3	8	0	0	10	407.133	228331	4.5	5.5	1.5	0.481745	0.288849	7	10.5751	10.2316	2507	2507		'Neu-H2O'		0.833333	0.833333	0.916667	0.666667	0	0.75	0	0.916667	0.75	0	0.833333	0	0	0	0	0	0	0	0	0.75	0	0	0.916667	0
	18	410.25	9	19	27	3	7	0	0	8	409.185	27248.9	6	0	3	0.192977	-0.316727	3.5	2.08642	14.239	3808	3808		no ID.		0.222222	0	0.507937	0.492063	0	0	0	0	0	0	0	0	0	0	0	0	0.253968	0.380952	0	0.365079	0	0	0	0
	18	426.75	9	18	23	3	9	0	0	9	425.143	4.92913e+06	5	57.5	16	0.95624	0.11976	7	105.626	10.171	2514	2462	'Neu'	'Ac'		0.894643	0.86875	0.942857	0.208036	0.122321	0.239286	0	0.866071	0.270536	0	0.8375	0	0	0	0	0	0	0	0.0455357	0.689286	0	0.0741071	0.908929	0
	18	426.75	9	18	24	3	9	0	0	8.5	426.151	76257.2	0	8.5	3	0.25763	-2.80945	5.5	5.59762	9.28783	2202	2202				0.928571	1	1	0	0	0	0	0.928571	0	0	0.928571	0	0	0	0	0	0	0	0	0.928571	0	0	0.928571	0
	18	426.75	9	18	23	2	10	0	0	8.5	427.135	40296.5	0	3	1.5	0.149228	-1.24902	5	2.01962	11.8582	3086	2982				0.875	0.625	0.75	0	0	0	0	0.75	0	0	0.75	0	0	0	0	0	0	0	0.625	0	0	0.875	0.5	0
	18	441.875	9	18	23	3	10	0	0	9	441.138	35719.5	0.5	3.5	1	0.13856	0.401235	4	1.69345	9.62566	2312	2311	'Neu'	'Gc'		0.4	1	1	0.5	0	0	0	0.4	0	0	0	0	0	0	0	0	0	0	0	0	0	0	0.8	0
	18	468	9	20	25	3	10	0	0	10	467.154	57494	0	4	1	0.530635	0.226906	3	5.58793	11.9029	3049	3049	'Neu'	'Ac2'		0	0	1	0	0	0	0	0	0	0	0	0	0	0	0	0	0	0	0	1	0	0	1	0
	19	407.5	9	18	21	3	8	0	0	10	407.133	4.33145e+06	15.5	20	6.5	0.63189	-3.64654	7	40.1515	10.0525	2455	2455	'Neu'	'Neu-H2O'		0.944444	1	1	0.527778	0.188889	0.844444	0	1	0.733333	0	0.938889	0	0	0	0	0	0	0	0	0.911111	0	0	0.972222	0
	19	426.75	9	18	23	3	9	0	0	9	425.143	4.85108e+07	133.5	232.5	82	0.705545	-4.00769	7	371.2	10.0717	2462	2462	'Neu'	'Ac'		0.523514	0.763807	0.991204	0.0879591	0.0351836	0.198661	0.0355341	0.889823	0.190216	0	0.636389	0	0	0	0	0	0	0	0	0.462118	0	0	1	0
	19	426.75	9	17	19	3	10	0	0	10	425.107	19204.2	0	7	1	0.269555	-3.91666	5	3.9265	12.7907	3346	3346				0.155556	0.677778	1	0.2	0	0	0.266667	0.777778	0	0	0.466667	0	0	0	0	0	0	0	0	0.2	0	0	1	0
	19	426.75	9	17	21	3	10	0	0	9	427.123	11787.7	0	4.5	1	0.261275	-1.52181	3.5	2.64674	19.5008	5530	5530				0	0.625	1	0.125	0	0	0.3125	0.75	0	0	0.375	0	0	0	0	0	0	0	0	0.125	0	0	1	0
	19	440.5	9	19	25	3	9	0	0	9	439.159	16695.4	1	13	2	0.870295	-1.57323	6.5	26.4336	9.44452	2259	2259	'Neu'	AcMe'		0.9375	0.916667	1	0.0625	0	0.4375	0	1	0.5625	0	0.854167	0	0	0	0	0	0	0	0	0.854167	0	0	1	0
	19	441.875	9	18	23	3	10	0	0	9	441.138	2.6913e+06	10.5	44	6	0.87708	0.263353	7	77.0925	9.44652	2259	2260	'Neu'	'Gc'		0.842949	0.919872	1	0.217949	0	0.400641	0	0.979167	0.400641	0	0.722756	0	0	0	0	0	0	0	0	0.738782	0	0	1	0
	19	443.25	9	18	24	3	10	0	0	8.5	442.146	32203.5	0	2.5	0	0.235414	-2.38948	4.5	2.46972	10.2487	2468	2572				1	1	1	0.125	0	0	0	0.5	0	0	0.25	0	0	0	0	0	0	0	0	0.25	0	0	1	0
	19	443.25	9	18	25	3	10	0	0	8	443.154	41132	1	0	1	0.404	-4.58046	5.5	3.18846	10.0898	2468	2468				0.928571	0.857143	0.857143	0	0	0	0	0.757143	0	0	0.542857	0	0	0	0	0	0	0	0	0.728571	0	0	0.857143	0
	19	457	9	18	23	3	11	0	0	9	457.133	69559.9	1.5	0	1	0.49307	-2.90889	4	3.83704	10.1835	2525	2473		no ID.		1	1	1	0	0	0	0	1	0	0	0	0	0	0	0	0	0	0	0	0	0	0	1	0
	19	468	9	20	25	3	10	0	0	10	467.154	2.63674e+06	17.5	28	7	0.93034	0.358319	7	67.443	11.8749	3049	3049	'Neu'	'Ac2'		0.595238	0.642857	1	0.238095	0	0.595238	0	0.52381	0.380952	0	0.238095	0	0	0	0	0	0	0	0	1	0	0	0.952381	0
	20	407.5	9	19	25	3	7	0	0	9	407.169	61380.7	1.5	0	5	0.114147	-1.68075	6	1.58796	9.50882	2507	2091				0.555	0.82	0.958333	0	0	0.186667	0	0.776667	0.186667	0	0.49	0	0	0	0	0	0	0	0	0.268333	0	0	1	0
	20	407.5	9	18	21	3	8	0	0	10	407.133	465806	0	8.5	4.5	0.245365	-0.460783	4.5	5.97786	11.8417	2455	3651	'Neu'	'Ac-H2O'		0.389423	0.514423	0.96875	0	0	0.125	0	0.675481	0.09375	0	0.21875	0	0	0	0	0	0	0	0	0.15625	0	0	1	0
	20	424	9	19	26	4	7	0	0	9	422.18	67911.9	1	0	2.5	0.17066	-1.66706	7	1.85239	8.43159	1941	1941				0.627273	0.809091	0.9	0.236364	0	0.481818	0	0.9	0.3	0	0.527273	0	0	0	0	0	0	0	0	0.763636	0	0	1	0
	20	424	9	18	21	3	9	0	0	10	423.128	309552	0	7.5	2.5	0.54071	-0.757927	7	10.791	8.43159	1941	1941	'Neu'	'Gc-H2O'		0.65	0.75	0.8	0.25	0	0.3	0	0.8	0.2	0	0.45	0	0	0	0	0	0	0	0	0.65	0	0	1	0
	20	426.75	9	18	23	3	9	0	0	9	425.143	7.2468e+06	12	69.5	24	0.917	-1.38765	7	124.149	8.82833	2202	1942	'Neu'	'Ac'		0.709787	0.78234	0.96	0.182553	0.0412766	0.213191	0	0.87617	0.213191	0	0.584681	0	0	0	0	0	0	0	0.0625532	0.573404	0	0.0425532	0.937447	0
	20	440.5	9	19	26	4	8	0	0	9	438.175	651622	0	15.5	6.5	0.620275	-3.75604	7	19.9269	8.4462	1947	1947				0.333333	0.766667	1	0.441667	0	0.266667	0	0.483333	0.183333	0	0.225	0	0	0	0	0	0	0	0	0.333333	0	0	1	0
	20	440.5	9	19	25	3	9	0	0	9	439.159	205160	0	18	4	0.429625	-0.844557	7	15.8342	8.4462	1947	1947	'Neu'	'AcMe'		0.690476	0.895238	1	0.485714	0	0.490476	0	0.795238	0.485714	0	0.414286	0	0	0	0	0	0	0	0	0.690476	0	0	1	0
	20	440.5	9	18	23	3	10	0	0	9	441.138	6.77564e+06	15.5	53.5	13	0.7155	-0.532214	7	73.167	8.4462	1947	1947	'Neu'	'Gc'		0.317094	0.67094	0.987179	0.259829	0.0222222	0.248718	0	0.648718	0.245299	0	0.283761	0.0991453	0	0	0	0	0.0128205	0	0	0.441026	0	0	0.987179	0
	20	484.5	9	20	25	3	11	0	0	10	483.149	94455	0	4	1	0.337385	-0.336956	4	4.76032	9.83655	2483	2327	'Neu'	'AcGc'		0.166667	0.166667	1	0	0	0	0	0	0	0	0	0	0	0	0	0	0	0	0	0.75	0	0	0.916667	0
	21	0	0	0	0	0	0	0	0	0	0	0	0	0	0	0	0	0	0	0	0	0				0	0	0	0	0	0	0	0	0	0	0	0	0	0	0	0	0	0	0	0	0	0	0	0
	22	0	0	0	0	0	0	0	0	0	0	0	0	0	0	0	0	0	0	0	0	0				0	0	0	0	0	0	0	0	0	0	0	0	0	0	0	0	0	0	0	0	0	0	0	0
	23	0	0	0	0	0	0	0	0	0	0	0	0	0	0	0	0	0	0	0	0	0				0	0	0	0	0	0	0	0	0	0	0	0	0	0	0	0	0	0	0	0	0	0	0	0
	24	0	0	0	0	0	0	0	0	0	0	0	0	0	0	0	0	0	0	0	0	0				0	0	0	0	0	0	0	0	0	0	0	0	0	0	0	0	0	0	0	0	0	0	0	0
	25	385.5	9	16	20	2	9	0	0	8	384.117	119061	2	2	0.5	0.236925	1.1231	5.5	2.88575	9.95725	2395	2447	'Kdn'	'base'		1	1	1	0.5	0.166667	0	0	0.666667	0.5	0	1	0	0	0	0	0	0	0	0	1	0	0	1	0
	25	440.5	9	19	24	2	10	0	0	9	440.143	101830	2	7.5	4	0.310955	-0.0261279	3.5	6.37435	15.2458	4027	4235				1	0.25	0.25	0	0	0	0	0	0	0	0	0	0	0	0	0	0	0	0	0.35	0	0	1	0
	26	0	0	0	0	0	0	0	0	0	0	0	0	0	0	0	0	0	0	0	0	0				0	0	0	0	0	0	0	0	0	0	0	0	0	0	0	0	0	0	0	0	0	0	0	0
	27	0	0	0	0	0	0	0	0	0	0	0	0	0	0	0	0	0	0	0	0	0				0	0	0	0	0	0	0	0	0	0	0	0	0	0	0	0	0	0	0	0	0	0	0	0
	28	0	0	0	0	0	0	0	0	0	0	0	0	0	0	0	0	0	0	0	0	0				0	0	0	0	0	0	0	0	0	0	0	0	0	0	0	0	0	0	0	0	0	0	0	0
	29	0	0	0	0	0	0	0	0	0	0	0	0	0	0	0	0	0	0	0	0	0				0	0	0	0	0	0	0	0	0	0	0	0	0	0	0	0	0	0	0	0	0	0	0	0
	30	0	0	0	0	0	0	0	0	0	0	0	0	0	0	0	0	0	0	0	0	0				0	0	0	0	0	0	0	0	0	0	0	0	0	0	0	0	0	0	0	0	0	0	0	0
	31	0	0	0	0	0	0	0	0	0	0	0	0	0	0	0	0	0	0	0	0	0				0	0	0	0	0	0	0	0	0	0	0	0	0	0	0	0	0	0	0	0	0	0	0	0
	32	0	0	0	0	0	0	0	0	0	0	0	0	0	0	0	0	0	0	0	0	0				0	0	0	0	0	0	0	0	0	0	0	0	0	0	0	0	0	0	0	0	0	0	0	0
	33	385.5	9	16	20	2	9	0	0	8	384.117	90925.2	2	2	1	0.29908	2.15533	5	3.68067	8.67491	1979	2031	'Kdn'	'base'		1	1	1	1	1	0	0	1	0	0	1	0	0	0	0	0	0	0	0	0	0	0	1	0
	34	385.5	9	16	20	2	9	0	0	8	384.117	92198.6	2.5	2.5	1	0.290785	1.16254	6.5	4.36774	8.74739	2031	2031	'Kdn'	'base'		1	1	1	1	1	0	0	0.666667	0.666667	0	0.666667	0	0	0	0	0	0	0	0	0.666667	0	0	1	0
	34	451.5	9	20	28	4	8	0	0	9	452.191	54001.9	0	3	1	0.120291	3.08719	4	0.864769	8.66493	2003	2003				1	0.25	0.75	0.333333	0	0	0	0	0	0	0	0	0	0	0	0	0	0	0	0	0.5	0	0	0.25
	35	426.75	9	18	23	3	9	0	0	9	425.143	1.07489e+06	6	24	8	0.82532	-1.17231	7	43.0566	10.169	2410	2566	'Neu'	'Ac'		0.618357	0.857488	0.956522	0.782609	0.111111	0.333333	0	0.934783	0.444444	0	0.792271	0	0.111111	0	0	0	0	0	0	0.705314	0	0	1	0
	35	440.5	9	19	25	3	9	0	0	9	439.159	23964.1	0	2.5	0	0.536765	2.87481	3	3.8451	9.62272	2311	2311	'Neu'	'AcMe'		0.75	0.25	0	0.75	0	0	0.25	0	0.5	0	0	0	0	0	0	0	0	0	0	0	0	0	0	0
	36	426.75	9	18	23	3	9	0	0	9	425.143	57814.9	1.5	0	1.5	0.34977	0.0129368	3.5	2.4593	9.85352	2566	2254	'Neu'	'Ac'		0.166667	0.833333	1	0	0	0	0	0.833333	0	0	0.5	0	0	0	0	0	0	0	0	0	0	0	1	0
	37	454.25	9	19	22	2	11	0	0	10	454.122	202378	3.5	3.5	2	0.46837	-0.632649	6	8.6955	15.5329	4240	4240				1	1	0.7	0	0	0.8	0	0.5	0.3	0	0.8	0	0	0	0	0	0	0	0	0.8	0	0	1	0
	38	0	0	0	0	0	0	0	0	0	0	0	0	0	0	0	0	0	0	0	0	0				0	0	0	0	0	0	0	0	0	0	0	0	0	0	0	0	0	0	0	0	0	0	0	0
	39	0	0	0	0	0	0	0	0	0	0	0	0	0	0	0	0	0	0	0	0	0				0	0	0	0	0	0	0	0	0	0	0	0	0	0	0	0	0	0	0	0	0	0	0	0
	40	410.25	9	18	23	3	8	0	0	9	409.149	189685	1	11.5	3.5	0.556335	-0.109618	5	14.3873	9.49002	2352	2196				1	0.75	1	0	0	0	0	0	0	0	0	0	0	0	0	0	0	0	0	0	1	0	0	0.75
	40	448.75	9	21	28	4	7	0	0	10	448.196	38104.5	0	2.5	1	0.2975	2.83358	4	2.93343	8.32854	1898	1898				1	1	0.5	0.5	0	0	0.5	0	0	0	0	0	0	0	0	0	0	0	0	0	1	0	0	0
	40	450.125	9	20	27	5	7	0	0	10	449.191	217490	0	8.5	1	0.694605	-0.931564	5	13.288	8.41024	1898	1951	'Pse'	'AcAm'		1	1	0.8	0.25	0	0	0.2	0	0	0	0	0	0	0	0	0	0	0	0	0	1	0	0	0.1
	40	450.125	9	22	29	2	8	0	0	9.5	449.192	188056	0	6	0.5	0.630805	-2.29011	4.5	9.98247	8.32996	1898	1899				1	1	0.75	0.25	0	0	0.25	0	0	0	0	0	0	0	0	0	0	0	0	0	1	0	0	0
	40	451.5	9	20	26	4	8	0	0	10	450.175	302899	3	8.5	1.5	0.747715	0.0725273	5	16.9406	8.651	2055	1951	'Pse'	'Ac2'		1	0.857143	0.857143	0	0	0	0	0	0	0	0	0	0	0	0	0	0	0	0	0	1	0	0	0.660714
	40	495.5	9	22	30	4	9	0	0	10	494.201	170550	6	7.5	3	0.60505	-0.05777	5	14.8297	9.17843	2279	2071	'Pse'	'AcHb'		1	0.75	0.625	0	0	0	0	0	0	0	0	0	0	0	0	0	0	0	0	0	1	0	0	0.75
	41	385.5	9	16	20	2	9	0	0	8	384.117	83198.4	2.5	2.5	1.5	0.3811	0.884887	5.5	5.59751	8.56247	1979	1979	'Kdn'	'base'		1	1	0.833333	0.5	0.166667	0.166667	0	0.166667	0	0	0	0	0	0	0	0	0	0	0	0.833333	0.166667	0	0.833333	0
	42	446	9+	21	26	4	7	0	0	11	446.18	189861	2	4	1	0.42374	0.0981666	3.5	5.94671	17.2178	4809	4757				1	0	0	0.5	0	0	1	0	0	0	0	0	0	0	0	0	0	0	0	0	0	0	0	0
	42	465.25	9+	21	28	4	8	0	0	10	464.191	185613	2	8	2.5	0.473625	0.246881	3.5	9.29481	11.6326	3048	2892				1	0	0	0.416667	0	0	0	0	0	0	0	0	0	0	0	0	0	0	0	0	0	0	0	0
	42	490	9+	23	28	4	8	0	0	12	488.191	3.5515e+06	10.5	18	5	0.79345	1.5782	5	39.1385	18.7895	5293	5293				0.954545	0	0.863636	1	0	0.340909	0.863636	0	0	0	0	0	0	0	0	0	0	0	0	0	0	0	0	0
	42	506.5	9+	23	30	4	9	0	0	11	506.201	7.5439e+06	9	24	6.5	0.9331	0.0942412	5	52.6598	16.3276	4519	4467				0.916667	0	0.702381	0.845238	0	0.22619	0.464286	0	0	0	0	0	0	0	0	0	0	0	0	0	0	0	0	0
	43	0	0	0	0	0	0	0	0	0	0	0	0	0	0	0	0	0	0	0	0	0				0	0	0	0	0	0	0	0	0	0	0	0	0	0	0	0	0	0	0	0	0	0	0	0
	44	0	0	0	0	0	0	0	0	0	0	0	0	0	0	0	0	0	0	0	0	0				0	0	0	0	0	0	0	0	0	0	0	0	0	0	0	0	0	0	0	0	0	0	0	0
	45	0	0	0	0	0	0	0	0	0	0	0	0	0	0	0	0	0	0	0	0	0				0	0	0	0	0	0	0	0	0	0	0	0	0	0	0	0	0	0	0	0	0	0	0	0
	46	465.25	9+	21	28	4	8	0	0	10	464.191	431281	3	10	2.5	0.523235	0.114393	3.5	13.5026	17.0928	4712	4816				1	0	0	0.666667	0	0	0	0	0	0	0	0	0	0	0	0	0	0	0	0	0	0	0	0
	46	490	9+	23	28	4	8	0	0	12	488.191	5.00992e+06	11	16	5	0.75784	-0.203373	5.5	35.7603	20.7893	6281	5657				0.909091	0.0909091	0.818182	0.863636	0	0.0909091	0.636364	0	0	0	0	0	0	0	0	0	0	0	0.0909091	0	0	0	0	0
	46	506.5	9+	23	30	4	9	0	0	11	506.201	9.82421e+06	10	22	7	0.93315	0.154524	5.5	51.6945	19.6996	5611	5611				0.857143	0.0714286	0.585714	0.757143	0	0.0714286	0.442857	0	0	0	0	0	0	0	0	0	0	0	0	0	0	0	0	0
	47	448.75	9	20	27	5	7	0	0	10	449.191	201627	0.5	2.5	0	0.194955	-0.897191	5.5	2.06783	8.89444	2054	2106	'Pse'	'AcAm'		1	1	1	0.666667	0	0	0	0	0	0	0	0	0	0	0	0	0	0	0	0	1	0	0	0
	47	448.75	9	20	24	4	8	0	0	11	448.159	76336.1	6	0	3.5	0.295805	-0.0756427	3.5	4.0771	13.4608	3614	3510				0.45	0	0.75	0	0.1	0	0	0	0	0	0	0	0	0	0	0	0	0	0	1	0	0	0.35	0
	48	495.5	9	22	30	4	9	0	0	10	494.201	64355.6	4	0	1	0.347495	-0.0269121	3.5	3.46143	14.5619	3787	4047	'Pse'	'AcHb'		1	0.25	0.166667	0	0	0	0	0	0	0	0	0	0	0	0	0	0	0	0	0	1	0	0	0.583333
	49	415.75	9	17	23	3	9	0	0	8	413.143	20666.7	0	4	1	0.31634	1.86013	4.5	3.73413	10.0479	2458	2458				1	1	0	1	0	0	0	0	0	0	0	0	0	0	0	0	0	0	0	0	1	0.5	0	0.5
	49	426.75	9	18	23	3	9	0	0	9	425.143	1.82007e+06	4	21	5.5	0.892495	-0.490376	7	43.1651	10.2994	2566	2514	'Neu'	'Ac'		0.916667	0.916667	1	0.466667	0.1	0.65	0	1	0.733333	0	0.833333	0	0	0	0	0	0	0	0	0.816667	0	0	1	0
	50	426.75	9	18	23	3	9	0	0	9	425.143	2.06344e+06	5	18	4.5	0.923975	0.155653	7	41.1242	8.61978	1994	1994	'Neu'	'Ac'		1	1	1	0.325	0.125	0.7	0	1	0.45	0	1	0	0	0	0	0	0	0	0	1	0	0	1	0
	51	410.25	9	18	24	4	7	0	0	9	408.164	190932	1.5	5	3	0.314688	-0.355249	5.5	6.87718	10.4367	2560	2612				1	0.8	0.35	0.425	0	0	0	0	0	0	0	0	0	0	0	0	0	0	0	0	1	0	0	0.475
	51	426.75	9	18	23	3	9	0	0	9	425.143	1.7226e+06	1.5	18	6	0.50799	-0.885137	7.5	22.9948	10.4539	2566	2618	'Neu'	'Ac'		0.727273	0.573427	0.923077	0.269231	0	0.367133	0	0.573427	0.367133	0.115385	0.482517	0	0	0	0	0	0	1	0	0.482517	0.153846	0	0.573427	0
	51	443.25	9	18	25	3	10	0	0	8	443.154	174634	8	0	4	0.207586	-0.0699531	5	5.38937	10.3924	2624	2520				1	0.214286	0.857143	0.547619	1	0	0.785714	0.238095	0	0	0	0	0	0	0	0	0	0	0	0	1	0	0.0714286	0.0714286
	51	451.5	9	20	25	3	9	0	0	10	451.159	52284.1	0.5	2.5	0.5	0.53312	-3.29052	6	6.21079	10.2438	2523	2523				1	1	1	1	0.25	0	0.75	0	0	1	0	0	0	0	0	0	0	0	0	0	1	0	0	1
	51	451.5	9	19	22	3	10	0	0	10.5	452.131	542766	1.5	0	1.5	0.75461	-3.79901	6	7.34938	10.4003	2575	2575				1	0.138889	0.416667	0.527778	0	0	0	0	0	0.416667	0	0	0	0	0	0	0	0	0	0	0.416667	0	0.638889	0.138889
	51	457	9	19	24	2	11	0	0	9	456.138	898504	0	4.5	2	0.128276	-1.18677	4.5	2.44813	10.3274	2577	2525				1	0.166667	1	0.666667	0	0	0	0	0	0	0	0	0	0	0	0	0	0	0	0	1	0	0	0
	51	479	9	21	26	4	9	0	0	11	478.17	4.1462e+06	6.5	13	3	0.475915	-0.337746	4.5	23.7132	10.5882	2637	2637				1	0.3	0.5	1	0.633333	0	0.633333	0	0	0.2	0	0	0	0	0	0	0	0	0	0	1	0	0	0.1
	51	495.5	9	21	26	4	10	0	0	11	494.165	23594.4	2.5	0	0	0.146524	-1.64611	5.5	1.28146	10.4484	2539	2643				1	0.416667	0.666667	1	0	0	0.833333	0	0	0.833333	0	0	0	0	0	0	0	0	0	0	1	0	0	0.166667
	51	501	9	20	26	3	12	0	0	9.5	500.152	14006.8	0.5	1	0	0.19993	-2.6322	3.5	1.23961	10.1406	2489	2489				1	0.5	0	1	0	0	0	0	0	0	0	0	0	0	0	0	0	0	0	0	1	0	0	0
	51	503.75	9	20	28	3	12	0	0	8.5	502.167	247828	1	2.5	1	0.40134	1.43	6	5.38491	10.4572	2542	2646				1	1	1	0.333333	0	0	1	0	0	0.5	0	0	0.5	0	0	0	0	1	0	0	1	0	0	0.666667
	51	506.5	9	22	26	4	10	0	0	12	506.165	2.17524e+06	27.5	35	13	0.605155	0.0207837	6.5	63.1366	10.5382	2647	2595				0.95	0.663333	0.666667	0.38	0	0	0.193333	0	0	0	0	0	0	0	0	0	0	0.08	0	0	1	0	0	0.513333
	51	509.25	9	22	28	4	10	0	0	11	508.181	27356.5	2.5	0	0	0.792345	-0.629697	4.5	6.20025	10.4628	2544	2648				1	0.416667	0.583333	0.333333	0	0	0.416667	0	0	0	0	0	0	0	0	0	0	0	0	0	1	0	0	0
	51	520.25	9	23	28	4	10	0	0	12	520.181	5.41279e+06	52	79.5	29	0.72085	-0.321302	7	145.453	10.5519	2600	2652				0.963636	0.454545	0.509091	0.109091	0	0.0636364	0.3	0	0	0	0	0	0	0	0	0	0	0.0818182	0	0	1	0	0	0.554545
	52	426.75	9	18	23	3	9	0	0	9	425.143	820231	5.5	8.5	2	0.50539	2.09374	5.5	16.1546	8.60688	1942	2046	'Neu'	'Ac'		1	0.928571	1	0.803571	0	0	0	0.857143	0	0	0.660714	0	0	0	0.410714	0	0	0	0	0	0	0	0.857143	0
	53	0	0	0	0	0	0	0	0	0	0	0	0	0	0	0	0	0	0	0	0	0				0	0	0	0	0	0	0	0	0	0	0	0	0	0	0	0	0	0	0	0	0	0	0	0
	54	426.75	9	18	23	3	9	0	0	9	425.143	2.11269e+06	3	17.5	5	0.901695	-0.31093	7	37.3464	8.70502	1994	2046	'Neu'	'Ac'		0.8	0.8	1	0.5	0	0.5	0	0.8	0.5	0	0.8	0	0	0	0	0	0	0	0	0.8	0	0	1	0
	54	468	9	20	25	3	10	0	0	10	467.154	22028	2	0	0.5	0.24488	0.0695702	3	1.53548	11.1565	2789	2841	'Neu'	'Ac2'		0	0	1	0	0	0	0	0	0	0	0	0	0	0	0	0	0	0	0	0.666667	0	0	1	0
	54	512	9	22	30	4	10	0	0	10	510.196	122811	1	2	1	0.76274	0.191691	5.5	8.6172	8.39562	1921	1921	'Pse'	'AcdiHB'		1	0.625	0.625	0.5	0.375	0	0.5	0	0	0	0	0	0	0	0	0	0	0	0	0	1	0	0	0.875
	55	0	0	0	0	0	0	0	0	0	0	0	0	0	0	0	0	0	0	0	0	0				0	0	0	0	0	0	0	0	0	0	0	0	0	0	0	0	0	0	0	0	0	0	0	0
	56	0	0	0	0	0	0	0	0	0	0	0	0	0	0	0	0	0	0	0	0	0				0	0	0	0	0	0	0	0	0	0	0	0	0	0	0	0	0	0	0	0	0	0	0	0
	57	0	0	0	0	0	0	0	0	0	0	0	0	0	0	0	0	0	0	0	0	0				0	0	0	0	0	0	0	0	0	0	0	0	0	0	0	0	0	0	0	0	0	0	0	0
	58	0	0	0	0	0	0	0	0	0	0	0	0	0	0	0	0	0	0	0	0	0				0	0	0	0	0	0	0	0	0	0	0	0	0	0	0	0	0	0	0	0	0	0	0	0
	59	0	0	0	0	0	0	0	0	0	0	0	0	0	0	0	0	0	0	0	0	0				0	0	0	0	0	0	0	0	0	0	0	0	0	0	0	0	0	0	0	0	0	0	0	0
	60	0	0	0	0	0	0	0	0	0	0	0	0	0	0	0	0	0	0	0	0	0				0	0	0	0	0	0	0	0	0	0	0	0	0	0	0	0	0	0	0	0	0	0	0	0
	61	0	0	0	0	0	0	0	0	0	0	0	0	0	0	0	0	0	0	0	0	0				0	0	0	0	0	0	0	0	0	0	0	0	0	0	0	0	0	0	0	0	0	0	0	0
	62	517.5	9	21	29	3	12	0	0	9	515.175	37508.3	1.5	0	0.5	0.222955	-0.700733	4	1.32907	8.79481	1923	2183				1	1	1	0	0	0	0	1	0	0	1	0	0	0.5	0	0	1	0	0	0	0	0	0	0
	63	385.5	9	16	20	2	9	0	0	8	384.117	167343	2	2	1	0.342695	1.16241	4	3.89526	8.06968	1823	1823	'Kdn'	'base'		1	1	1	0	0	0	0	0	0	0	0	0	0	0	0	0	0	0	0	0	0	0	0	0
	63	410.25	9	18	21	3	8	0	0	10	407.133	3.03974e+06	5	0	1	0.8462	0.213714	4	9.16408	8.48686	2040	1884	'Neu'	Neu-H2O'		0.616667	0.9	1	0	0	0.166667	0	1	0	0	0.433333	0	0	0	0	0	0	0	0	0.483333	0	0	0.633333	0
	63	426.75	9	18	23	3	9	0	0	9	425.143	7.11124e+07	68.5	139.5	43.5	0.984075	0.0838705	7	305.499	8.35612	1994	1838	'Neu'	'Ac'		0.644025	0.751341	0.971719	0.158069	0.0679265	0.226124	0.0113636	0.904367	0.259576	0.0113636	0.67786	0	0	0	0	0	0	0	0	0.576226	0	0.00568182	0.982955	0
	63	432.25	9	20	24	4	7	0	0	11	432.164	161823	3	7	2.5	0.66102	-0.194139	5.5	15.476	8.51851	2048	1892	'Pse'	Pse-H2O'		1	0.583333	0.75	0.25	0	0	0.25	0	0	0	0	0	0	0	0	0	0	0	0	0	1	0	0	0.416667
	63	450.125	9	20	27	5	7	0	0	10	449.191	4.5381e+06	0.5	8	2	0.92778	-0.0821811	7	21.7941	8.14298	1846	1847	'Pse'	AcAm'		0.9	0.9	1	0.672727	0	0	0.763636	0.0909091	0	0	0.0454545	0	0	0	0	0	0	0.563636	0	0.0454545	1	0	0.0454545	0.809091
	63	450.125	9	22	29	2	8	0	0	9.5	449.192	4.53697e+06	0	7.5	2	0.92735	-3.07128	7	20.8716	8.14298	1846	1847				1	1	1	0.772727	0	0	0.863636	0.0909091	0	0	0.0454545	0	0	0	0	0	0	0.613636	0	0.0454545	1	0	0.0454545	0.909091
	63	450.125	9	20	23	3	9	0	0	11	449.143	171775	3	0	0	0.148175	0.147503	4.5	1.4594	10.2201	2782	2263				0.416667	0.333333	0.916667	0.166667	0	0.333333	0	0	0.0833333	0	0	0	0	0	0	0	0	0	0	1	0.333333	0	0.666667	0
	63	451.5	9	20	26	4	8	0	0	10	450.175	4.58895e+06	16.5	36	4.5	0.948355	0.0724274	7	72.0555	8.38059	2003	1847	Pse'	'Ac2'		0.76	0.72	0.94	0.42	0	0.16	0.36	0.1	0	0	0.04	0	0	0	0	0	0	0.26	0	0.36	0.74	0	0.38	0.52
	63	465.25	9	22	30	3	8	0	0	9.5	464.203	132310	0	2	1	0.855825	-2.48706	3	7.61991	7.84839	1748	1748				1	0.5	0.5	0	0	0	0.5	0	0	0	0	0	0	0	0	0	0	0	0	0	1	0	0	0
	63	465.25	9	20	27	5	8	0	0	10	465.186	950722	0	15.5	2	0.831815	-0.201511	6	23.5538	8.0042	1800	1800	no id	no id		0.912879	0.776515	0.734848	0.390152	0.0833333	0.0416667	0.265152	0.132576	0	0	0.0416667	0	0	0	0	0	0	0	0	0.166667	0.787879	0	0.170455	0.348485
	63	465.25	9	22	29	2	9	0	0	9.5	465.187	950722	0	15.5	2	0.82942	-3.08785	6	23.4804	8.0042	1800	1800				0.912879	0.776515	0.734848	0.390152	0.0833333	0.0416667	0.265152	0.132576	0	0	0.0416667	0	0	0	0	0	0	0	0	0.166667	0.787879	0	0.170455	0.348485
	63	468	9	20	25	3	10	0	0	10	467.154	1.00681e+07	44	69	18	0.94106	0.358308	7	152.412	10.5602	2789	2477	'Neu'	'Ac2'		0.565455	0.619545	1	0.236364	0	0.47	0	0.423182	0.321818	0	0.256364	0	0	0	0	0	0	0	0	0.99	0	0	0.891818	0
	63	506.5	9	23	30	4	9	0	0	11	506.201	679218	15	24.5	8	0.496105	0.365566	5.5	33.8001	13.0133	3583	3271	'Pse'	'Pse+propyl(?)'		1	0.465278	0.916667	0	0	0	0.173611	0	0	0	0	0	0	0	0	0	0	0.0625	0	0	1	0	0	0.409722
	64	426.75	9	18	23	3	9	0	0	9	425.143	4.17466e+07	56	126.5	39	0.977015	0.01209	7	269.161	11.5576	2982	2930	'Neu'	'Ac'		0.626968	0.856977	1	0.254631	0.0994134	0.311362	0	0.931769	0.309972	0	0.682541	0	0	0	0	0	0.0126582	0	0	0.595091	0	0	1	0
	64	432.25	9	20	24	4	7	0	0	11	432.164	462228	11.5	21	7.5	0.673285	-0.300117	5	39.8058	11.6428	2984	2984	'Neu'	Neu-H2O'		1	0.410526	0.305263	0	0	0	0.105263	0	0	0	0	0	0	0	0	0	0	0	0	0	1	0	0	0.305263
	64	450.125	9	20	27	5	7	0	0	10	449.191	9.68853e+06	0	49	16.5	0.844355	-0.184086	7	69.4243	10.0711	2470	2471	'Pse'	'AcAm'		0.808528	0.480769	0.674749	0.315635	0	0.0204849	0.366221	0	0	0	0	0	0	0	0	0	0	0.248328	0	0.0614548	0.968645	0	0.0614548	0.550585
	64	450.125	9	22	29	2	8	0	0	9.5	449.192	9.68853e+06	0	49	16.5	0.844355	-3.17318	7	69.4243	10.0711	2470	2471				0.808528	0.480769	0.674749	0.315635	0	0.0204849	0.366221	0	0	0	0	0	0	0	0	0	0	0.248328	0	0.0614548	0.968645	0	0.0614548	0.550585
	64	451.5	9	20	26	4	8	0	0	10	450.175	6.86905e+06	13.5	86	22	0.956885	-0.0292553	7	148.643	11.5842	2991	2939	'Pse'	'Ac2'		0.857561	0.451963	0.626149	0.223475	0	0	0.27193	0	0	0	0	0	0	0	0	0	0	0.143275	0	0.0438596	0.973684	0	0.0438596	0.496241
	64	465.25	9	21	29	5	7	0	0	10	463.207	145506	0	1	0.5	0.75063	-0.397447	4.5	5.85345	10.1651	2476	2528	'Pse'	'AcAmMe'		0.833333	0.333333	0.166667	1	0	0	0	0	0	0	0	0	0	0	0	0	0	0	0	0	1	0	0	0.166667
	64	468	9	20	25	3	10	0	0	10	467.154	1.54248e+06	18.5	28	9	0.80487	0.292944	5.5	57.9572	15.1342	4141	4089	'Neu'	'Ac2'		0.488304	0.48538	1	0	0	0.540936	0	0.108187	0.160819	0	0	0	0	0	0	0	0	0	0	1	0	0	1	0
	64	506.5	9	23	30	4	9	0	0	11	506.201	524489	11.5	14	5	0.58134	0.486071	5	25.826	19.0707	4779	6027	'Pse'	'Pse+propyl(?)'		1	0.353846	0.746154	0	0	0	0.253846	0	0	0	0	0	0	0	0	0	0	0	0	0	1	0	0	0.457692
	65	413	9	17	23	3	9	0	0	8	413.143	52361.6	1	11	3	0.315945	1.37979	3	7.32252	8.93743	2093	2093				1	0.5	0	0	0	0.0833333	0	0	0	0	0	0	0	0	0	0	1	0	0	0	0	0	0	0
	65	426.75	9	18	23	3	9	0	0	9	425.143	2.63584e+06	5	45.5	18	0.84202	-0.131473	8	76.1704	9.50636	2254	2306	'Neu'	'Ac'		0.59127	0.702381	0.964286	0.333333	0	0.206349	0	0.900794	0.178571	0	0.765873	0	0	0	0	0	0.0992063	0.0277778	0	0.400794	0	0	1	0
	65	468	9	20	25	3	10	0	0	10	467.154	82899.8	0	6	3.5	0.49614	-0.132076	3	8.52585	12.2765	3101	3257	'Neu'	'Ac2'		0	0	1	0	0	0	0	0	0	0	0	0	0	0	0	0	0	0	0	1	0	0	0.8	0
	65	520.25	9	23	28	4	10	0	0	12	520.181	589761	14	22.5	7	0.63235	0.500019	5.5	40.632	13.0567	2288	4576				1	0.652047	0.704678	0	0	0.0526316	0.105263	0	0	0	0.157895	0	0	0	0	0	0.105263	0	0	0	1	0	0	0.652047
	66	385.5	9	16	20	2	9	0	0	8	384.117	2.2045e+07	39	39	21.5	0.94858	-0.267738	7	138.987	8.96577	2187	2031	'Kdn'	'base'		1	1	0.975	0.385526	0.152632	0.256579	0	0.510526	0.334211	0	0.821053	0	0	0.05	0	0	0	0	0	0.614474	0	0	1	0
	66	399.25	9	17	22	2	9	0	0	8	398.133	2.74686e+06	10	40	15	0.52464	0.713481	7	44.3118	10.5064	2608	2608	'Kdn'	'Me'		1	1	0.949519	0.100962	0	0.286058	0	0.759615	0.651442	0	0.918269	0.03125	0	0	0.03125	0	0	0	0	0.899038	0	0	0.96875	0
	66	426.75	9	18	22	2	10	0	0	9	426.127	642185	4	14	4.5	0.111843	1.42845	6	4.36403	10.6917	2774	2566	'Kdn'	'Ac'		0.944444	0.888889	0.944444	0	0	0.20202	0	0	0.383838	0	0.0909091	0	0	0	0	0	0	0	0	0.843434	0	0	0.944444	0
	67	426.75	9	18	23	3	9	0	0	9	425.143	233281	6.5	11.5	3	0.86686	-0.274966	6	28.504	10.486	2618	2566	'Neu'	'Ac'		0.785714	1	1	0	0	0.142857	0	1	0	0	0.928571	0	0	0	0	0	0	0	0	0.785714	0	0	1	0
	68	496.875	9	21	28	4	10	0	0	10	496.181	167805	5.5	2	1	0.48847	-0.152162	5	7.31707	10.6483	2643	2644	'Pse'	'AcPr'		1	0.8125	0.9375	0	0	0	0	0	0	0	0	0	0	0	0	0	0	0	0	0	1	0	0	0.9375
	69	495.5	9	21	28	4	10	0	0	10	496.181	328254	8.5	12.5	2	0.787835	0.0322463	5	25.911	11.6815	3007	2955	'Pse'	'AcPr'		1	0.8125	1	0	0	0	0.111111	0	0	0	0	0	0	0	0	0	0	0	0	0	1	0	0	1
	70	426.75	9	18	23	3	9	0	0	9	425.143	237687	8	10	3.5	0.479725	-0.131367	5	12.6773	9.32866	2150	2306	'Neu'	'Ac'		0.516667	0.816667	1	0	0	0	0	0.816667	0	0	0.616667	0	0	0	0	0	0	0	0	0.433333	0	0	1	0
71	71	426.75	9	18	23	3	9	0	0	9	425.143	426602	4	7.5	3	0.716735	0.191582	6	15.5534	10.0937	2566	2358	'Neu'	'Ac'		0.875	0.875	1	0.25	0	0.25	0	1	0.25	0	0.875	0	0	0	0	0	0	0	0	0.75	0	0	1	0
	72	0	0	0	0	0	0	0	0	0	0	0	0	0	0	0	0	0	0	0	0	0				0	0	0	0	0	0	0	0	0	0	0	0	0	0	0	0	0	0	0	0	0	0	0	0
	73	385.5	9	16	20	2	9	0	0	8	384.117	1.43929e+07	44	44	22.5	0.408255	-0.466368	7	65.2806	8.71785	2031	2031	'Kdn'	'base'		1	1	1	0.0914729	0.0343669	0.215762	0	0.466925	0.38708	0	0.910078	0	0	0.0232558	0	0	0	0	0	0.738243	0	0	1	0
	73	410.25	9	18	23	3	8	0	0	9	409.149	15508.1	1.5	0	0	0.18115	1.68521	3	1.03294	9.31042	2508	1936				1	0.666667	0.166667	0	0	0	0	0	0	0	0	0	0	0	0	0	0	0	0	0	0.5	0	0	0
	73	426.75	9	18	22	2	10	0	0	9	426.127	474177	10	15.5	4	0.448575	-0.182926	6	19.2392	10.0515	2566	2358	'Kdn'	'Ac'		1	0.863636	0.854545	0	0	0.236364	0	0.2	0.427273	0	0.136364	0	0	0	0	0	0	0	0	0.618182	0	0	1	0
	74	0	0	0	0	0	0	0	0	0	0	0	0	0	0	0	0	0	0	0	0	0				0	0	0	0	0	0	0	0	0	0	0	0	0	0	0	0	0	0	0	0	0	0	0	0
	75	0	0	0	0	0	0	0	0	0	0	0	0	0	0	0	0	0	0	0	0	0				0	0	0	0	0	0	0	0	0	0	0	0	0	0	0	0	0	0	0	0	0	0	0	0
	76	385.5	9	16	20	2	9	0	0	8	384.117	111495	2.5	2.5	1	0.122497	1.63882	4.5	2.0311	8.56021	2031	1927	'Kdn'	'base'		1	1	1	0	0	0	0	0.25	0	0	0.5	0	0	0	0	0	0	0	0	0.25	0	0	1	0
	76	454.25	9	19	23	3	10	0	0	10	453.138	730220	4	17.5	5.5	0.888165	-0.0803287	4.5	34.0764	10.2446	2680	2368				0.780303	0.530303	1	0.0833333	0.348485	0	0	0.787879	0	0	0	0	0	0	0	0	0	0	0	0	1	0	0.0833333	0
	77	0	0	0	0	0	0	0	0	0	0	0	0	0	0	0	0	0	0	0	0	0				0	0	0	0	0	0	0	0	0	0	0	0	0	0	0	0	0	0	0	0	0	0	0	0
	78	385.5	9	16	20	2	9	0	0	8	384.117	1.01242e+06	8.5	8.5	4	0.66223	0.129518	7	24.7198	9.20687	2291	2083	'Kdn'	'base'		1	1	1	0.314286	0	0.271429	0.0714286	1	0.7	0	0.9	0	0	0	0	0	0	0	0	1	0	0	1	0
	78	410.25	9	18	23	3	8	0	0	9	409.149	780658	13.5	26	7.5	0.87769	0.151412	6.5	56.5173	11.8027	3080	2976				0.970588	0.878431	1	0.0588235	0	0	0.501961	0	0	0	0	0	0	0	0	0	0	0	0	0	0.970588	0	0	0.833333
	78	426.75	9	18	23	3	9	0	0	9	425.143	85918.4	4.5	6.5	2	0.27131	0.839129	3.5	6.54702	7.74747	1006	2410	'Neu'	'Ac'		0.227273	0.318182	1	0	0	0	0	0.409091	0	0	0.318182	0	0	0	0	0	0	0	0	0.136364	0	0	1	0
	78	432.25	9	20	24	4	7	0	0	11	432.164	3.6606e+06	36	54.5	18.5	0.933395	0.547407	7	139.035	16.6958	4648	4596				1	0.744582	0.762384	0.0851393	0.0688854	0.0294118	0.413313	0.0557276	0	0	0	0	0	0	0	0	0	0.173375	0	0	1	0	0	0.780186
	78	447.375	9	22	28	3	7	0	0	10.5	446.193	15674	1.5	0	0.5	0.457674	0.667873	3.5	2.69818	10.8125	4342	1065				0.5	0.5	0.5	0.5	0	0	0	0	0	0	0	0	0	0	0	0	0	0.5	0	0	0.5	0	0	0.5
	78	451.5	9	20	26	4	8	0	0	10	450.175	1.4796e+07	40	80.5	23.5	0.96998	0.0724274	7	180.12	10.0831	2575	2367	'Pse'	'Ac2'		0.988636	0.857727	0.889091	0.210909	0	0	0.441818	0	0	0	0	0	0	0	0	0	0	0.230909	0	0	1	0	0	0.855
	78	468	9	21	30	4	8	0	0	9	466.206	34493.8	0	6.5	2	0.275065	0.289571	4	4.25116	10.2604	2633	2425				0.875	0	0.75	0	0	0	0	0	0	0	0	0	0.25	0	0	0	0	0	0	0	0.875	0	0.5	0.125
	78	480.375	9	21	29	5	8	0	0	10	479.202	177003	0	8	1	0.495265	1.31229	5.5	9.06397	8.83622	2065	2066				1	0.666667	0.833333	0.0833333	0	0	0.333333	0	0	0	0	0	0	0	0	0	0	0	0	0	1	0	0	0.833333
	78	480.375	9	23	31	2	9	0	0	9.5	479.203	250086	0	10	1.5	0.796385	0.89868	5.5	17.6316	8.83622	2065	2066				1	0.75	0.875	0.125	0	0	0.375	0	0	0	0	0	0	0	0	0	0	0	0	0	1	0	0	0.875
	78	465.25	9+	21	28	4	8	0	0	10	464.191	181917	4	0	3	0.420985	0.180098	3	4.38596	13.1442	3516	3412				1	0	0.875	0	0	0	0	0	0	0	0	0	0	0	0	0	0	0	0	0	1	0	0	0
	79	0	0	0	0	0	0	0	0	0	0	0	0	0	0	0	0	0	0	0	0	0				0	0	0	0	0	0	0	0	0	0	0	0	0	0	0	0	0	0	0	0	0	0	0	0
	80	0	0	0	0	0	0	0	0	0	0	0	0	0	0	0	0	0	0	0	0	0				0	0	0	0	0	0	0	0	0	0	0	0	0	0	0	0	0	0	0	0	0	0	0	0
	81	410.25	9	18	23	3	8	0	0	9	409.149	90253.8	5	8	2	0.80701	-0.147624	5	20.0196	10.7856	2716	2664				1	0.8	0.9	0	0	0	0	1	0	0	0	0	0	0	0	0	0	0	0	0	1	0	0	0.9
	81	426.75	9	18	23	3	9	0	0	9	425.143	137753	5.5	9	2.5	0.739325	0.0481014	5.5	20.1557	10.2405	2514	2514	'Neu'	'Ac'		0.733333	0.733333	1	0	0	0	0	1	0	0	0.9	0	0	0	0	0	0	0	0	1	0	0	1	0
	81	479	9	22	30	4	8	0	0	10	478.206	116329	4	5	1.5	0.616595	0.218525	5	12.2713	13.5045	3573	3573				1	1	0.633333	0	0	0	0	0	0	0	0	0	0	0	0	0	0	0	0	0	1	0	0	0.8
	81	479	9	21	29	5	8	0	0	10	479.202	133946	0	10	2	0.798695	0.2933	4	16.6124	8.37431	1909	1909				0.785714	0.357143	0.142857	0.642857	0	0	0	1	0	0	0	0	0	0	0	0	0	0	0	0	1	0	0	0.142857
	81	479	9	23	31	2	9	0	0	9.5	479.203	133946	0	10	2	0.729235	-2.50844	4	15.1179	8.37431	1909	1909				0.785714	0.357143	0.142857	0.642857	0	0	0	1	0	0	0	0	0	0	0	0	0	0	0	0	1	0	0	0.142857
	81	479	9	20	24	4	10	0	0	11	480.149	38517.1	1	0	2.5	0.140849	-4.27961	4	1.0501	8.37431	1909	1909				0.55	0.2	0.125	0.675	0	0	0	1	0	0	0	0	0	0	0	0	0	0	0	0	1	0	0	0.125
	82	495.5	9	22	30	4	9	0	0	10	494.201	169425	6	0	2.5	0.83626	0.405705	4	11.2683	8.84413	2123	2019	'Pse'	'AcHb'		1	0.342857	0.728571	0	0	0	0.2	0	0	0	0	0	0	0	0	0	0	0	0	0	1	0	0	0.657143
	83	0	0	0	0	0	0	0	0	0	0	0	0	0	0	0	0	0	0	0	0	0				0	0	0	0	0	0	0	0	0	0	0	0	0	0	0	0	0	0	0	0	0	0	0	0
	84	410.25	9	18	23	3	8	0	0	9	409.149	111547	2	2.5	1	0.85786	-0.295858	7	12.624	8.83426	2092	2040				1	1	1	0.75	0	0	0.25	0	0	0	0	0	0	0	0	0	0	0	0	0	1	0	0	1
	84	432.25	9	20	24	4	7	0	0	11	432.164	289009	5.5	11	3.5	0.855935	0.865064	6	27.1069	8.46654	1944	1944				1	0.535714	0.535714	0.535714	0.25	0	0.392857	0	0	0	0	0	0	0	0	0	0	0	0	0	1	0	0	0.535714
	84	451.5	9	20	26	4	8	0	0	10	450.175	4.30252e+06	13	19	5	0.953805	0.614761	7	48.5884	8.56452	2003	1951	'Pse'	'Ac2'		0.916667	0.660714	0.577381	0.309524	0.0833333	0	0.380952	0	0	0	0	0	0	0	0	0	0	0.309524	0	0	1	0	0	0.619048
	85	432.25	9	20	24	4	7	0	0	11	432.164	69776.9	3.5	4.5	1.5	0.526855	0.44173	4.5	10.3161	8.77759	2100	1996				1	1	1	0	0	0	0	0	0	0	0	0	0	0	0	0	0	0	0	0	1	0	0	0.5
	85	451.5	9	20	26	4	8	0	0	10	450.175	2.45143e+06	11.5	18.5	5	0.886345	0.343589	7	44.4715	8.63847	2055	1951	'Pse'	'Ac2'		0.95	0.961538	0.911538	0.607692	0	0	0.530769	0	0	0	0	0	0	0	0	0	0	0.530769	0	0	0.95	0	0	0.911538
	86	432.25	9	20	24	4	7	0	0	11	432.164	371025	11.5	20	6	0.586335	0.194255	5	29.9674	9.04908	2100	2152				1	0.767045	0.673295	0	0	0	0.0625	0	0	0	0	0	0	0	0	0	0	0	0	0.0625	1	0	0	0.553977
	86	451.5	9	20	26	4	8	0	0	10	450.175	8.38612e+06	29	59.5	20.5	0.913225	0.140223	7	120.622	9.06973	2107	2159	'Pse'	'Ac2'		0.989362	0.744433	0.755072	0.256556	0	0.0212766	0.29045	0	0	0	0	0	0	0	0	0	0	0.17615	0	0	1	0	0	0.735774
	87	426.75	9	18	23	3	9	0	0	9	425.143	82108.4	1.5	4.5	1	0.47149	0.40304	3.5	7.2828	9.24278	2254	2150	'Neu'	'Ac'		0.4	0.4	1	0	0	0	0	1	0	0	0.7	0	0	0	0	0	0	0	0	0.4	0	0	1	0
	87	432.25	9	20	24	4	7	0	0	11	432.164	2.59668e+06	31.5	50	11.5	0.802045	0.512155	6.5	97.5157	9.24771	2204	2204				0.984848	0.633333	0.648485	0.0606061	0	0	0.287879	0	0	0	0	0	0	0	0	0	0	0.157576	0	0	1	0	0	0.524242
	87	451.5	9	20	26	4	8	0	0	10	450.175	2.73433e+07	78.5	126.5	38.5	0.944135	0.546962	7	273.618	9.10866	2159	2159	'Pse'	'Ac2'		0.994845	0.650821	0.685822	0.201858	0	0.0103093	0.350134	0	0	0	0	0	0	0	0	0	0	0.21624	0	0	0.994845	0	0	0.774405
	87	492.75	9	22	28	4	9	0	0	11	492.186	1.10028e+06	7.5	9.5	3	0.750595	-0.317177	5.5	21.2225	14.604	3942	3942	'Pse'	'Ac3'		1	0.9375	1	0	0	0	0.660714	0	0	0	0	0	0	0	0	0	0	0.535714	0	0	1	0	0	0.125
	88	410.25	9	18	23	3	8	0	0	9	409.149	305923	9.5	16.5	4.5	0.68377	-0.109618	6	30.3785	9.88227	2456	2352				1	0.888889	1	0.1	0	0	0.211111	0	0	0	0	0	0	0	0	0	0	0	0	0	1	0	0	0.788889
	88	426.75	9	18	23	3	9	0	0	9	425.143	61806.7	4	3	2	0.52161	-0.345766	5	6.76896	9.01687	2150	2098	'Neu'	'Ac'		0.5	0.25	1	1	0	0	0	1	0	0	0	0	0	0	0	0	0	0	0	0.5	0	0	1	0
	88	432.25	9	20	24	4	7	0	0	11	432.164	113540	5	7.5	2.5	0.539525	0.159199	5.5	13.9778	9.10294	2152	2152				0.9	0.633333	0.9	0.7	0	0	0	0	0	0	0	0	0	0	0	0	0.1	0	0	0	1	0	0	0.566667
	88	451.5	9	20	26	4	8	0	0	10	450.175	2.68781e+06	28.5	40.5	13.5	0.88499	-0.0292553	7	89.9423	9.04284	2159	2107	'Pse'	'Ac2'		1	0.608796	0.755208	0.409722	0.0740741	0	0.267361	0	0	0	0	0	0	0	0	0	0	0.167824	0	0	1	0	0	0.624421
	89	385.5	9	16	20	2	9	0	0	8	384.117	186829	3.5	3.5	1.5	0.34739	0.169219	6	6.46823	8.48125	1979	1927	'Kdn'	'base'		1	1	1	0.25	0	0	0	0.75	0.5	0	1	0	0	0	0	0	0	0	0	0.583333	0	0	1	0
	89	410.25	9	17	22	4	8	0	0	9	410.144	21430.6	0	2.5	0	0.36851	3.14439	4	2.99408	8.34642	1936	1884				1	1	0.5	0.25	0	0	0.5	0	0	0	0	0	0	0	0	0	0	0	0	0	0	0	0	0
	89	426.75	9	18	23	3	9	0	0	9	425.143	294859	7	14	3.5	0.703255	-0.239096	6.5	27.2205	9.01078	2150	2098	'Neu'	'Ac'		1	1	1	0.166667	0	0	0	1	0.333333	0	0.708333	0	0	0	0	0	0	0	0	0.875	0	0	1	0
	89	448.75	9	21	28	4	7	0	0	10	448.196	26281	0	1.5	0.5	0.27865	1.30189	5	2.53906	8.31618	1898	1898				1	1	1	0	0	0	0.5	0	0	0	0	0	0	0	0	0	0	0	0	0	1	0	0	1
	89	448.75	9	22	29	2	8	0	0	9.5	449.192	54820.1	0	2.5	0.5	0.575325	0.190676	5	7.81775	8.31618	1898	1898				1	1	1	0	0	0	0.5	0	0	0	0	0	0	0	0	0	0	0	0	0	1	0	0	0.75
	89	451.5	9	20	26	4	8	0	0	10	450.175	504259	9	16.5	4.5	0.653375	-0.0292109	5	26.5011	8.95638	2107	2107	'Pse'	'Ac2'		0.961538	0.63986	0.755245	0	0	0	0.335664	0	0	0	0	0	0	0	0	0	0	0	0	0	1	0	0	0.51049
	89	468	9	19	24	4	10	0	0	10	468.149	27929.3	3	0	1.5	0.529295	0.36954	3	4.39046	9.53468	2269	2321				0	0	1	0	0	0	0	0	0	0	0	0	0	0	0	0	0	0	0	1	0	0	1	0
	89	479	9	21	29	5	8	0	0	10	479.202	58031.4	0	1.5	0	0.747485	0.64357	6	6.55578	8.34841	1909	1909				1	0.75	1	1	0	0	0	0.25	0	0	0	0	0	0	0	0	0	0	0	0	1	0	0	0.75
	89	479	9	23	31	2	9	0	0	9.5	479.203	58031.4	0	1.5	0	0.747485	-2.159	6	6.55578	8.34841	1909	1909				1	0.75	1	1	0	0	0	0.25	0	0	0	0	0	0	0	0	0	0	0	0	1	0	0	0.75
	89	481.75	9	21	27	3	10	0	0	10	481.17	10177.6	0	1.5	0.5	0.609685	0.490679	5	5.57413	8.35122	1910	1910	'Neu'	'Ac2Me'		1	0.5	1	1	0	0	0	0	0	0	0	0	0	0	0	0	0	0	0	0	1	0	0	0.5
	90	410.25	9	18	24	4	7	0	0	9	408.164	21180.3	0	2	0	0.279675	1.36465	4	2.03655	8.27256	1884	1884				1	1	1	0	0	0	0	0	0	0	0	0	0	0	0	0	0	0	0	0	0	0	0	0
	90	410.25	9	19	27	3	7	0	0	8	409.185	24089.7	2.5	0	1	0.287265	1.3979	4	2.20548	8.27256	1884	1884				1	0.541667	0.291667	0	0	0	0	0	0	0	0	0	0	0	0	0	0	0	0	0	0.708333	0	0	0.333333
	90	426.75	9	18	23	3	9	0	0	9	425.143	328195	6.5	12	4	0.649045	0.227453	6	21.8109	8.53928	1994	1942	'Neu'	'Ac'		0.803571	0.928571	1	0.142857	0	0	0	1	0	0	0.803571	0	0	0	0	0	0	0	0	0.410714	0	0	1	0
	90	448.75	9	21	28	4	7	0	0	10	448.196	95283.5	0	2.5	1	0.49144	1.30155	4.5	5.15592	8.32219	1898	1898				1	1	0.5	1	0	0	1	0	0	1	0	0	0	0	0	0	0	0	0	0	1	0	0	0
	90	450.125	9	20	27	5	7	0	0	10	449.191	111562	0.5	2	0.5	0.719535	-1.47465	5	6.99441	8.3236	1898	1899	'Pse'	'AcAm'		0.833333	1	0.583333	0.583333	0	0	0.833333	0	0	0.583333	0	0	0	0	0	0	0	0	0	0	0.833333	0	0	0.25
	90	451.5	9	20	26	4	8	0	0	10	450.175	863095	6.5	14.5	3.5	0.825415	0.513134	5	30.5407	8.5647	1951	2003	'Pse'	'Ac2'		1	0.944444	0.944444	0	0	0	0.777778	0	0	0	0	0	0	0	0	0	0	0	0	0	1	0	0	0.944444
	90	468	9	20	25	3	10	0	0	10	467.154	71000.7	5.5	0	1	0.42689	-0.0331796	3.5	4.45469	11.5483	2945	2945	'Neu'	'Ac2'		0	0.1	1	0	0	0	0	0	0	0	0	0	0	0	0	0	0	0	0	1	0	0	0.916667	0
	91	385.5	9	16	20	2	9	0	0	8	384.117	167020	3.5	3.5	1.5	0.27973	-0.307459	5	5.59689	8.63638	1927	2083	'Kdn'	'base'		1	1	1	0	0	0	0	0.833333	0.333333	0	0.833333	0	0	0	0	0	0	0	0	0.833333	0	0	1	0
	91	410.25	9	18	23	3	8	0	0	9	409.149	64658.1	1	0	2.5	0.607345	0.0391056	3.5	4.57407	10.3507	2352	2768				0.9	0.375	0.8	0	0	0	0	0	0	0	0	0	0	0	0	0	0	0	0	0	1	0	0	0.2
	91	432.25	9	20	24	4	7	0	0	11	432.164	42858.7	2.5	4.5	2.5	0.49734	0.477249	4.5	8.93858	15.814	4336	4336				0.75	0.2	0.7	0	0.65	0.1	0	0.65	0	0	0	0	0	0	0	0	0	0	0	0	1	0	0	0.7
	91	451.5	9	20	26	4	8	0	0	10	450.175	576732	7	14.5	4.5	0.814495	-0.0969623	5	30.7193	9.11283	2003	2315	'Pse'	'Ac2'		1	0.8	0.9	0	0	0	0.45	0	0	0	0	0	0	0	0	0	0	0	0	0	1	0	0	1
	92	385.5	9	16	20	2	9	0	0	8	384.117	176785	3	3	1	0.323975	2.35423	4.5	4.80503	8.48135	1927	1979	'Kdn'	'base'		1	1	1	0	0	0	0	0	0.166667	0	0.166667	0	0	0	0	0	0	0	0	0.5	0	0	1	0
	92	451.5	9	20	26	4	8	0	0	10	450.175	304392	5	5	1.5	0.51204	-0.131615	4	12.988	9.11601	2055	2263	'Pse'	'Ac2'		1	0.5	0.6875	0	0	0	0.125	0	0	0.0625	0	0	0	0	0	0	0	0	0	0	1	0	0	0.5
[truncated: 24 more columns]

## Sheet: 2. ABBREVIATIONS HIT-LIST
	Sample												Window	Water			Mass delta	#		RT				CORE				8-Carbon												9-Carbon
	Number	Channel	Class	C	H	N	O	P	S	RDBE	Mass	Intensity	Score	Score	Consec	Overlap	(av, ppm)	Fragments	Total Score	(min)	AiRM-1	AiRM-2		205.061	217.061	229.061	231.076	265.061	267.077	269.092	283.072	285.087	287.103	301.082	303.098	305.113	319.093	321.108	323.124	277.061	279.077	281.092	295.072	297.087	299.103	313.082	315.098	317.113	331.093
	3	385.5	9	16	20	2	9	0	0	8	384.117	5.19139e+06	14	14	7	0.95257	0.129492	7	54.2513	6.20708	1199	1199		0	0.129032	0	1	0	0	0	0	0	0	0	0	0	0	0	0	0	1	0	0	0	0	0	0	0	0
	5	426.75	9	18	23	3	9	0	0	9	425.143	292412	0	13.5	5.5	0.676135	-1.92594	5	18.7932	8.89084	2150	2046		0.481818	0.718182	1	0	0	0	0	0.818182	0	0	0.663636	0	0	0	0	0	0	0	0	0.481818	0	0	1	0	0	0
	5	426.75	9	18	24	3	9	0	0	8.5	426.151	62805	0	3	0	0.227205	-3.99037	5	2.10044	8.89084	2150	2046		0.583333	0.583333	1	0	0	0	0	0.75	0	0	0.833333	0	0	0	0	0	0	0	0	0.583333	0	0	1	0	0	0
	46	465.25	9+	21	28	4	8	0	0	10	464.191	431281	3	10	2.5	0.523235	0.114393	3.5	13.5026	17.0928	4712	4816		1	0	0	0.666667	0	0	0	0	0	0	0	0	0	0	0	0	0	0	0	0	0	0	0	0	0	0
	Sample Number	Sample number as listed in work sheet 2
	Channel	DIA channels from 380 - 520 m/z (centre), in 2.5 m/z steps (50 channels), see sheet 4.
	Class	Ulusonic acid backbone length assigned
	C	Number of carbon atoms
	H	Number of hydrogen atoms
	N	Number of nitrogen atoms
	O	Number of oxygen atoms
	P	Number of phosphor atoms
	S	Number of sulfur atoms
	RDBE	Double bond equivalent, or degree of unsaturation. (R)DBE = C - H/2 + N/2 + 1
	Mass	Formula mass of the most likely parent ion candidate
	Intensity	Summed MS1 peak intensity of the most likley parent ion candidate
	Window Score	Positive score for number of scans in which the hit is the only candidate within the mass window
	Water Score	Positive score for number of scans which contain an insource (MS1) or neutral loss (aligned MS2) of water corresponding to the hit
	Consec	Positive score for consecutive MS1 scans that include the hit
	Overlap	Percentage of total intensity of hit divided by total intensity of that mass in raw spectra
	Mass delta	Deviation of measured mass from formula mass in ppm
	# Fragments	Number of annotated structure fragments (core plus class fragments)
	Total Score	Score which is compared against random dataset, which is defined asgiven by Total Score = (Window score + Water score + #Fragments) x Overlap
	RT	Reverse phase elution time in minutes
	AiRM-1	All ion reaction monitoring run 1
	AiRM-2	All ion reaction monitoring run 2
	CORE	Smallest (unique) 3 Carbon backbone DMB-UA (ulosonic acid) fragments
	8-Carbon	8-Carbon backgone fragments at differnt levels of oxidation and saturation
	9-Carbon	9-Carbon backgone fragments at differnt levels of oxidation and saturation
	9+	9+ carbon fragments at different levels of oxidation and saturation
	Reporters 1	Reporter fragements for potential unspecific labelling
	Reporters 2	Reporters fragments for potential DMB degradation
3	385.5	Single hit per channel. Only one possible hit was assigned as possible parent ion for the detected transition.
5	426.75	More than one (boxed) hit for a channel. More than one possible parent ion for the identified transition (here 2). Hits are ranked by structural evidence scores. Often, poorly removed isotopes account for duplications of channel hits.
5	426.75
	46	Blue filled sample number box indicates a higher carbon ulusonic acid
[truncated: 22 more columns]

## Sheet: 3. SAMPLE DETAILS
	Sample No / Prefix	Strain/Sample	Additional info	Domain	Kingdom	Phylum/Class	Gram Pos/Negative	Purity	Growth medium	Carbon source	NEU (animal) containing medium	Aerobicity	Other reference	Notes	Strain/Sample	Control type	Additional note(s)	Additional reference(s)
	1	DMB blank	NA	artificial	artificial	artificial	NA	pure	NA	NA	NA	NA	.-	.-	DMB blank	Method NEG control.	Investigation of excess DMB reagent on false positives. No false positives due to presence of unreacted reagent was observed.	.	.	.	.
	2	Sialic acid reference	NA	artificial	artificial	artificial	NA	pure	NA	NA	NA	NA	Ludger, Prozyme GKRP-2503	.-	Sialic acid reference	Method POS control.	Synthetic reference with defined content (Neu5Ac, Neu5Gc, Neu5,7Ac2, Neu5Gc,9Ac, Neu5,8Ac2, Neu5,9Ac2 and NeuAc3). All sialic acid reference compounds were identified.	https://www.ludger.com/docs/products/cm/cm-srp-01-b71n-07-cofa.pdf	2. Varki, Ajit. "Diversity in the sialic acids." Glycobiology 2.1 (1992): 25-40.	.	.
	3	KDN reference	NA	artificial	artificial	artificial	NA	pure	NA	NA	NA	NA	Sigma 60714	.-	KDN reference	Method POS control.	Synthetic reference (containing Kdn). Kdn identified as expected.	https://www.sigmaaldrich.com/catalog/product/sigma/60714	.	.	.
	4	STD1: (1:1 KDN Sialic acid reference)	NA	artificial	artificial	artificial	NA	pure	NA	NA	NA	NA	.-	.-	STD1: (1:1 KDN Sialic acid reference)	Method POS control.	Synthetic reference (mix of sample No 2 and sample No 1). All sialic acid reference compounds were identified.	See refs samples 2 and 3.	.	.	.
	5	BactoTM Peptone	NA	artificial	artificial	artificial	NA	pure	NA	NA	NA	NA	.-	.-	BactoTM Peptone	Method procedure control.	Growth medium control. Animal origin, therefore animal-type sialic acids expected. The sample showed indeed animal-type NeuAc sialic acids.	https://www.thermofisher.com/order/catalog/product/211677#/211677	.	.	.
	6	BactoTM Yeast extract	NA	artificial	artificial	artificial	NA	pure	NA	NA	NA	NA	.-	.-	BactoTM Yeast extract	Method procedure control.	Growth medium control. Pureley yeast extracts related. No sialic acid compounds are expected. The samples did not show any sialic acid related peaks.	https://www.thermofisher.com/order/catalog/product/212710#/212710	.	.	.
	7	BactoTM Tryptone	NA	artificial	artificial	artificial	NA	pure	NA	NA	NA	NA	.-	.-	BactoTM Tryptone	Method procedure control.	Growth medium control. Animal origin, therefore animal-type sialic acids are expected. The sample showed different types of NeuAC and NeuGc sialic acids.	https://www.thermofisher.com/order/catalog/product/211699#/211699	.	.	.
	8	Fucose (Fuc)	NA	artificial	artificial	artificial	NA	pure	NA	NA	NA	NA	.-	.-	Fucose (Fuc)	Method procedure control.	Testing for nonspecific labelling due to presence of bulk sugars in cell lysates, and identification of fragment indicators.	.	.	.	.
	9	Glucose (Glc)	NA	artificial	artificial	artificial	NA	pure	NA	NA	NA	NA	.-	.-	Glucose (Glc)	Method procedure control.	Testing for nonspecific labelling due to presence of bulk sugars in cell lysates, and identification of fragment indicators.	.	.	.	.
	10	Glucuronic acid (GlcA)	NA	artificial	artificial	artificial	NA	pure	NA	NA	NA	NA	.-	.-	Glucuronic acid (GlcA)	Method procedure control.	Testing for nonspecific labelling due to presence of bulk sugars in cell lysates, and identification of fragment indicators.	.	.	.	.
	11	1:1:1 Fuc:Glc:GlcA	NA	artificial	artificial	artificial	NA	pure	NA	NA	NA	NA	.-	.-	1:1:1 Fuc:Glc:GlcA	Method procedure control.	Testing for nonspecific labelling due to presence of bulk sugars in cell lysates, and identification of fragment indicators.	.	.	.	.
	12	STD2: (1:1 KDN Sialic acid refernce)	NA	artificial	artificial	artificial	NA	pure	NA	NA	NA	NA	.-	.-	STD2: (1:1 KDN Sialic acid refernce)	Method procedure control.	Synthetic reference (mix of sample No 2 and sample No 1)	See refs samples 2 and 3.	.	.	.
	13	STD2:K12 1:1 pre	NA	artificial	artificial	artificial	NA	pure	NA	NA	NA	NA	.-	.-	STD2:K12 1:1 pre	Method procedure control.	Test recovery of synthetic reference mix (No 1+2) after spiking into E coli K12. All standard compounds could be detected.	See refs samples 2 and 3.	.	.	.
	14	STD2:K12 1:5 pre	NA	artificial	artificial	artificial	NA	pure	NA	NA	NA	NA	.-	.-	STD2:K12 1:5 pre	Method procedure control.	Test recovery of synthetic reference mix (No 1+2) after spiking into E coli K12. All standard compounds could be detected.	See refs samples 2 and 3.	.	.	.
	15	STD2:K12 1:10 pre	NA	artificial	artificial	artificial	NA	pure	NA	NA	NA	NA	.-	.-	STD2:K12 1:10 pre	Method procedure control.	Test recovery of synthetic reference mix (No 1+2) after spiking into E coli K12. All standard compounds could be detected.	See refs samples 2 and 3.	.	.	.
	16	STD2:K12 1:1 post	NA	artificial	artificial	artificial	NA	pure	NA	NA	NA	NA	.-	.-	STD2:K12 1:1 post	Method procedure control.	Test recovery of synthetic reference mix (No 1+2) after spiking into E coli K12. All standard compounds could be detected.	See refs samples 2 and 3.	.	.	.
	17	CHO cells	NA	Eukaryotes	Animalia	Chordata	NA	pure	Ham's F12 + FBS	Glucose + serum	yes	Aerobic	Sigma Aldrich	Model organism	CHO cells	Animal cell material POS control.	Animal positive control. Known to mostly containing Neu5Ac and related derivatives and small proportions of NeuGc. This could be confirmed.	1. Hokke, Cornelis H., et al. "Sialylated carbohydrate chains of recombinant human glycoproteins expressed in Chinese hamster ovary cells contain traces of N‐glycolylneuraminic acid." FEBS letters 275.1-2 (1990): 9-14.	2. North, Simon J., et al. "Glycomics profiling of Chinese hamster ovary cell glycosylation mutants reveals N-glycans of a novel size and complexity." Journal of Biological Chemistry 285.8 (2010): 5759-5775.	3. Varki, Ajit. "Diversity in the sialic acids." Glycobiology 2.1 (1992): 25-40.	.
	18	HELA cells (No Serum)	NA	Eukaryotes	Animalia	Chordata	NA	pure	EX-CELL HeLa serum free	Glucose	no	Aerobic	Sigma 08011102	Model organism	HELA cells (No Serum)	Animal cell material POS control.	Human cell line positive control. Expected to contain Neu5Ac and low/trace amounts related derivatives. This could be confirmed.	1. Chou, Hsun-Hua, et al. "A mutation in human CMP-sialic acid hydroxylase occurred after the Homo-Pan divergence." Proceedings of the National Academy of Sciences 95.20 (1998): 11751-11756.	2. Carubelli, R., and M. J. Griffin. "Sialic acid in HeLa cells: effect of hydrocortisone." Science 157.3789 (1967): 693-694.	3. Varki, Ajit. "Diversity in the sialic acids." Glycobiology 2.1 (1992): 25-40.	.
	19	HELA cells (Serum grown)	NA	Eukaryotes	Animalia	Chordata	NA	pure	EMEM (EBSS) + FBS	Glucose +serum	yes	Aerobic	Sigma 93021013	Model organism	HELA cells (Serum grown)	Animal cell material POS control.	Human cell line positive control. Expected to contain Neu5Ac and highly increased amounts of NeuGc due to animal derived grwoth medieum. This could be confirmed.	1. Tangvoranuntakul, Pam, et al. "Human uptake and incorporation of an immunogenic nonhuman dietary sialic acid." Proceedings of the National Academy of Sciences 100.21 (2003): 12045-12050.	2. Varki, Ajit. "Diversity in the sialic acids." Glycobiology 2.1 (1992): 25-40.	.	.
	20	IgG type antibody (non-human)	NA	Eukaryotes	Animalia	Chordata	NA	pure	Animal derived, affinity purified	Animal derived, affinity purified	no	Aerobic	Merck Millipore AP182P	.-	IgG type antibody (non-human)	Method procedure control.	Glycoprotein, expected to only contain bound animal-type sialic acid. Successful hydrolysis should show significant levels of sialic acids. This could be confirmed.	1. Varki, Ajit. "Diversity in the sialic acids." Glycobiology 2.1 (1992): 25-40.		.	.
	21	Arabidopsis thaliana	NA	Eukaryotes	Plants	flowering plant	NA	pure	Soil	CO2	no	Aerobic	.-	Model organism	Arabidopsis thaliana		Plants have been shown not to produce (animal-type) sialic acids due to lack or incomplete NAB pathways in previous studies. This was confirmend, also no other nonulosonic acid like compounds could be observed in this study.	1. Zeleny, Reinhard, et al. "Sialic acid concentrations in plants are in the range of inadvertent contamination." Planta 224.1 (2006): 222-227.	2. Castilho, Alexandra, et al. "Construction of a functional CMP-sialic acid biosynthesis pathway in Arabidopsis." Plant physiology 147.1 (2008): 331-339.	.	.
	22	Nicotiana benthamiana	NA	Eukaryotes	Plants	flowering plant	NA	pure	Soil	CO2	no	Aerobic	.-	Model organism	Nicotiana benthamiana		Plants have been shown not to produce (animal-type) sialic acids due to lack or incomplete NAB pathways in previous studies. This was confirmend, also no other nonulosonic acid like compounds could be observed in this study.	1. Zeleny, Reinhard, et al. "Sialic acid concentrations in plants are in the range of inadvertent contamination." Planta 224.1 (2006): 222-227.	2. Strasser, Richard. "Engineering of human-type O-glycosylation in Nicotiana benthamiana plants." Bioengineered 4.4 (2013): 191-196.	.	.
	23	Saccharomyces cerevisiae	NA	Eukaryotes	Fungi	Ascomycota	NA	pure	Defined, Mineral	Glucose	no	Aerobic	.-	Substrate limited chemostat	Saccharomyces cerevisiae	Microbial cell material NEG control.	Most yeasts strains, such as Saccharomyces cerevisiae, do not produce (animal-type) sialic acids due to lack or incomplete NAB pathways. This was confirmed, also no other nonulosonic acid like compounds were detected in this study.	1. Hamilton, Stephen R., et al. "Humanization of yeast to produce complex terminally sialylated glycoproteins." Science 313.5792 (2006): 1441-1443.	.	.	.
	24	Cryptomonas spec.	979-5	Eukaryotes	(Algae)	Cryptophyta	NA	pure	MiEB12 Agar	CO2	no	Aerobic	EPSAG 979-5	axenic	Cryptomonas spec.		The preseence of KDN was confirmed in (a) microalgae in a recent study.	1. Wagstaff, Ben A., Martin Rejzek, and Robert A. Field. "Identification of a Kdn biosynthesis pathway in the haptophyte Prymnesium parvum suggests widespread sialic acid biosynthesis among microalgae." Journal of Biological Chemistry 293.42 (2018): 16277-16290.	.	.	.
	25	Cricophaera carterae	944-1	Eukaryotes	(Algae)	Haptophyta	NA	pure	0.5 SWES Agar	CO2	no	Aerobic	EPSAG 944-1	axenic	Cricophaera carterae		The preseence of KDN was confirmed in (a) microalgae in a recent study.	See ref sample 24.	.	.	.
	26	Chlamydomonas reinhardtii I	18-79	Eukaryotes	(Algae)	Chlorophyta	NA	pure	ESP Agar	CO2	no	Aerobic	EPSAG 18-79	axenic	Chlamydomonas reinhardtii I		The preseence of KDN was confirmed in (a) microalgae in a recent study.	See ref sample 24.	.	.	.
	27	Chlamydomonas reinhardtii II	11-32a	Eukaryotes	(Algae)	Chlorophyta	NA	pure	K Agar	CO2	no	Aerobic	EPSAG 11-32a	axenic	Chlamydomonas reinhardtii II		The preseence of KDN was confirmed in (a) microalgae in a recent study.	See ref sample 24.	.	.	.
	28	Chlorella sorokinii	NA	Eukaryotes	(Algae)	Chlorophyta	NA	pure*	WC Medium	CO2	no	Aerobic	.-	not axenic	Chlorella sorokinii		The preseence of KDN was confirmed in (a) microalgae in a recent study.	See ref sample 24.	.	.	.
	29	Asterionella formosa	NA	Eukaryotes	Chromista	Heterokonta	NA	pure*	CHU 10 Medium	CO2	no	Aerobic	.-	not axenic	Asterionella formosa				.	.	.
	30	Pediastrum sp	NA	Eukaryotes	(Algae)	Chlorophyta	NA	pure*	WC Medium	CO2	no	Aerobic	.-	not axenic	Pediastrum sp		The preseence of KDN was confirmed in (a) microalgae in a recent study.	See ref sample 24.	.	.	.
	31	Diatoma sp	NA	Eukaryotes	Chromista	Heterokonta	NA	pure*	CHU 10 medium	CO2	no	Aerobic	.-	not axenic	Diatoma sp				.	.	.
	32	Galdieria sulphuraria	NA	Eukaryotes	Algae	Red Algae	NA	pure	Defined	Glucose / CO2	no	Aerobic	.-	Acidophile, Thermophile	Galdieria sulphuraria		The preseence of KDN was confirmed in (a) microalgae in a recent study.	See ref sample 24.	.	.	.
	33	Alexandrium ostenfeldii strain I	NA	Eukaryotes	(Diaphoretickes)	Alveolata	NA	pure*	0.5 K Medium	CO2	no	Aerobic	.-	not axenic	Alexandrium ostenfeldii strain I			.	.	.	.
	34	Alexandrium ostenfeldii strain II	NA	Eukaryotes	(Diaphoretickes)	Alveolata	NA	pure*	0.5 K Medium	CO2	no	Aerobic	.-	not axenic	Alexandrium ostenfeldii strain II			.	.	.	.
	35	Haloferax volcanii	NA	Prokaryotes	Archeae	Euryarchaeota	Archeal	pure	Halobacterium medium	Casein Tryptone	yes	Fac Anaerobic	DSMZ 3757	Halophile, Alkaliphile	Haloferax volcanii			.	.	.	.
	36	Sulfolobus acidocaldarius	NA	Prokaryotes	Archeae	Crenarchaeota	Archeal	pure	Brock medium	Sucrose	no	Aerobic	.-	Acidophile	Sulfolobus acidocaldarius			.	.	.	.
	37	Halalkaliarchaeum desulfuricum	NA	Prokaryotes	Archeae	unclassified Archaea	Archeal	pure	Halobacterium medium	Yeast extract	no	Fac Aerobic	.-	Halophile, Alkaliphile	Halalkaliarchaeum desulfuricum			.	.	.	.
	38	Halorhabdus tiamatea	NA	Prokaryotes	Archeae	Euryarchaeota	Archeal	pure	Halobacterium medium	Yeast extract	no	Aerobic	.-	Alkaliphile, Halophile, Thermophile	Halorhabdus tiamatea			.	.	.	.
	39	Nitrospira moscoviensis	NA	Prokaryotes	Bacteria	Nitrospirae	Negative	pure	Defined, Mineral	Yeast extract / Bicarbonate	no	Litoautotroph	.-	.-	Nitrospira moscoviensis			.	.	.	.
	40	Scalindua, marine anammox	NA	Prokaryotes	Bacteria	Planktomycetes	Negative	pure	Defined, Mineral	CO2	no	Anaerobic	.-	.-	Scalindua, marine anammox			.	.	.	.
	41	Brocadia sap.	NA	Prokaryotes	Bacteria	Planktomycetes	Negative	pure	Defined, Mineral	CO2	no	Anaerobic	.-	.-	Brocadia sap.			.	.	.	.
	42	Magnetospirllium Gryphiswaldense	NA	Prokaryotes	Bacteria	Alfa-proteobacteria	Negative	pure	Defined	acetate	no	Microaerophillic	.-	Magnetotactic	Magnetospirllium Gryphiswaldense			.	.	.	.
	43	Ctrl: Magnetospirllium gryphiswaldense, no DMB, no acid	NA	Prokaryotes	Bacteria	Alfa-proteobacteria	Negative	pure	Defined	acetate	no	Microaerophillic	.-	Magnetotactic	Ctrl: Magnetospirllium gryphiswaldense, no DMB, no acid	Method procedure control.	Test analysis of microbial sample in absense of acid-release/labelling steps. No labelled ulsonic acid peaks were detected (as otherwise found in run 42 or 46)	.	.	.	.
	44	Ctrl: Magnetospirllium gryphiswaldense, no DMB, acid	NA	Prokaryotes	Bacteria	Alfa-proteobacteria	Negative	pure	Defined	acetate	no	Microaerophillic	.-	Magnetotactic	Ctrl: Magnetospirllium gryphiswaldense, no DMB, acid	Method procedure control.	Test analysis of microbial sample in absense of the labelling step. No labelled ulsonic acid peaks were detected (as otherwise found in run 42 or 46)	.	.	.	.
	45	Ctrl: Magnetospirllium gryphiswaldense, DMB, no acid	NA	Prokaryotes	Bacteria	Alfa-proteobacteria	Negative	pure	Defined	acetate	no	Microaerophillic	.-	Magnetotactic	Ctrl: Magnetospirllium gryphiswaldense, DMB, no acid	Method procedure control.	Test analysis of microbial sample in absense of the acid-release step. No labelled ulsonic acid peaks were detected (as otherwise found in run 42 or 46)	.	.	.	.
	46	Ctrl: Magnetospirllium gryphiswaldense, DMB, acid	NA	Prokaryotes	Bacteria	Alfa-proteobacteria	Negative	pure	Defined	acetate	no	Microaerophillic	.-	Magnetotactic	Ctrl: Magnetospirllium gryphiswaldense, DMB, acid	Method procedure control.	Test analysis of microbial sample using complete sample prepration protocol. All higher ulosonic acid variants as previously found in 42 could be detected.	.	.	.	.
	47	Magnetospirillium J10	NA	Prokaryotes	Bacteria	Alfa-proteobacteria	Negative	pure	Defined	acetate	no	Microaerophillic	.-	Magnetotactic	Magnetospirillium J10			.	.	.	.
	48	Magnetospirillum magneticum	NA	Prokaryotes	Bacteria	Alfa-proteobacteria	Negative	pure	MSGM medium	Lactate, acetate	no	Microaerophillic	.-	Magnetotactic	Magnetospirillum magneticum			.	.	.	.
	49	Roseobacter sp.	NA	Prokaryotes	Bacteria	Alfa-proteobacteria	Negative	pure	Bacto marine broth	Casein Tryptone	yes	Aerobic	DSMZ 15398	.-	Roseobacter sp.			.	.	.	.
	50	Stappia aggregata	NA	Prokaryotes	Bacteria	Alfa-proteobacteria	Negative	pure	Bacto marine broth	Casein Tryptone	yes	Anaerobic	DSMZ 10149	.-	Stappia aggregata			.	.	.	.
	51	Paraccocus Denitrificans	NA	Prokaryotes	Bacteria	Alfa-proteobacteria	Negative	pure	LB agar	Casein Tryptone	yes	Aerobic/Anaerobic	.-	.-	Paraccocus Denitrificans			.	.	.	.
	52	Acidovorax Avenae	NA	Prokaryotes	Bacteria	Beta-proteobacteria	Negative	pure	LB agar	Casein Tryptone	yes	Aerobic	DSMZ 7227	.-	Acidovorax Avenae			.	.	.	.
	53	Serpentinomonas mccroryi A	NA	Prokaryotes	Bacteria	Beta-proteobacteria	Negative	pure	Defined, Mineral	Acetate	no	Aerobic	.-	.-	Serpentinomonas mccroryi A			.	.	.	.
	54	Shewanella oneidensis	NA	Prokaryotes	Bacteria	Gamma-proteobacteria	Negative	pure	LB agar	Casein Tryptone	yes	Fac Anaerobic	.-	Alkaliphile	Shewanella oneidensis			.	.	.	.
	55	Citrobacter Fruendii pure culture	NA	Prokaryotes	Bacteria	Gamma-proteobacteria	Negative	pure	Defined	Xylose	no	Fac Anaerobic	.-	.-	Citrobacter Fruendii pure culture			.	.	.	.
	56	Escherichia Coli BW 25113	NA	Prokaryotes	Bacteria	Gamma-proteobacteria	Negative	pure	Defined	Glucose	no	Fac Anaerobic	.-	Model organism, substrate limited chemostat	Escherichia Coli BW 25113			.	.	.	.
	57	Escherichia Coli K12	NA	Prokaryotes	Bacteria	Gamma-proteobacteria	Negative	pure	Defined, Mineral	Glucose	no	Fac Anaerobic	.-	Model organism	Escherichia Coli K12	Microbial cell material NEG control.	Where some E coli strains can produce a polysialic acid containing capsule (such as K-1), the industrial strain E coli K-12 has been shown to lack the required Neu/NAB genes. In confirmation to the lack of genes, no significant quantities of nonulosonic acids could be detected in this study.	1. Barry, Guy T. "Detection of sialic acid in various Escherichia coli strains and in other species of bacteria." Nature 183.4654 (1959): 117-118.	2. Steenbergen, Susan M., and Eric R. Vimr. "Biosynthesis of the Escherichia coli K1 group 2 polysialic acid capsule occurs within a protected cytoplasmic compartment." Molecular microbiology 68.5 (2008): 1252-1267.	.	.
	58	Pseudomonas putida	NA	Prokaryotes	Bacteria	Gamma-proteobacteria	Negative	pure	Defined, Mineral	Glucose	no	Aerobic	.-	Model orgnaism, Bio Remediation	Pseudomonas putida			.	.	.	.
	59	Geobacter ammonificans	NA	Prokaryotes	Bacteria	Delta-proteobacteria	Negative	pure	Defined, Mineral	Acetate	no	Anaerobic	.-	.-	Geobacter ammonificans			.	.	.	.
	60	Myxococcus xanthus	NA	Prokaryotes	Bacteria	Delta-proteobacteria	Negative	pure	V2y agar	Yeast extract	no	Aerobic	DSMZ 16526	.-	Myxococcus xanthus			.	.	.	.
	61	Stigmatella aurantiaca	NA	Prokaryotes	Bacteria	Delta-proteobacteria	Negative	pure	V2y agar	Yeast extract	no	Aerobic	DSMZ 17044	.-	Stigmatella aurantiaca			.	.	.	.
	62	Rhodopseudomonas pure culture	NA	Prokaryotes	Bacteria	Alfa-proteobacteria	Negative	pure	Defined	Acetate	no	Aerobic/Anaerobic	.-	.-	Rhodopseudomonas pure culture			.	.	.	.
	63	Campylobacter jejuni 9141	NA	Prokaryotes	Bacteria	Epsilon-proteobacteria	Negative	pure	MH broth	Casein Tryptone, Meat extract	yes	Microaerophillic	.-	Pathogenic	Campylobacter jejuni 9141	Microbial cell material POS control	Most frequent reported Pse derivatives for C. jejuni (flagella) are Pse5Ac7Ac and Pse5Am7Ac (both confirmed by NMR) plus additional variations thereof (Refs 1/2). Both Pse5Ac7Ac and Pse5Am7Ac, were also most abundant for the strains investigated here. Other variations were only very low intense (for the mass range measured). LOS outer core structures of C. jejuni strains have shown to contain Neu…	1. Thibault, Pierre, et al. "Identification of the carbohydrate moieties and glycosylation motifs in Campylobacter jejuni flagellin." Journal of Biological Chemistry 276.37 (2001): 34862-34870.	2. Hitchen, Paul, et al. "Modification of the Campylobacter jejuni flagellin glycan by the product of the Cj1295 homopolymeric-tract-containing gene." Microbiology 156.Pt 7 (2010): 1953.	3. Montreuil, Jean, Johannes Frederik Gerardus Vliegenthart, and Harry Schachter, eds. Glycoproteins II. Elsevier, 1997. (see page 261, table 5)	4. Gilbert, Michel, et al. "Biosynthesis of ganglioside mimics in Campylobacter jejuni OH4384 identification of the glycosyltransferase genes, enzymatic synthesis of model compounds, and characterization of nanomole amounts by 600-MHz 1H AND 13C NMR analysis." Journal of Biological Chemistry 275.6 (2000): 3896-3906.	.
	64	Campylobacter jejuni GB11	NA	Prokaryotes	Bacteria	Epsilon-proteobacteria	Negative	pure	MH broth	Casein Tryptone, Meat extract	yes	Microaerophillic	.-	Pathogenic	Campylobacter jejuni GB11	Microbial cell material POS control	Most frequent reported Pse derivatives for C. jejuni (flagella) are Pse5Ac7Ac and Pse5Am7Ac (both confirmed by NMR) plus additional variations thereof (Refs 1/2). Both Pse5Ac7Ac and Pse5Am7Ac, were also most abundant for the strains investigated here. Other variations were only very low intense (for the mass range measured). LOS outer core structures of C. jejuni strains have shown to contain Neu…	.		.	.
	65	Mycobacterium smegmatis	NA	Prokaryotes	Bacteria	Actinomycetes	Positive	pure	TSB agar	Casein Tryptone	yes	Aerobic	.-	.-	Mycobacterium smegmatis			.	.	.	.
	66	Streptomyces coelicolor	NA	Prokaryotes	Bacteria	Actinomycetes	Positive	pure	MS agar	Mannitol, soy flour	no	Aerobic	.-	.-	Streptomyces coelicolor	Microbial cell material POS control	Streptomyces coelicolor has been found (using NMR) to produce Kdn (and derivatives) which are incorporated into a sugar polymer. Kdn and derivatives (methylation, acetylation) could be also detected in this study.	1. Shashkov, Alexander S., et al. "Novel teichulosonic acid from cell wall of Streptomyces coelicolor M145." Carbohydrate research 359 (2012): 70-75	.	.	.
	67	Rhodococcus erythtropolis	NA	Prokaryotes	Bacteria	Actinomycetes	Positive	pure	LB agar	Casein Tryptone	yes	Aerobic	.-	.-	Rhodococcus erythtropolis			.	.	.	.
	68	Clostridium saccharoperbutylacetonicum	planctonic cells	Prokaryotes	Bacteria	Firmicutes	Positive	pure	Defined, Mineral	Glucose	no	Anaerobic	.-	.-	Clostridium saccharoperbutylacetonicum			.	.	.	.
	69	Clostridium saccharoperbutylacetonicum	aggregates	Prokaryotes	Bacteria	Firmicutes	Positive	pure	Defined, Mineral	Glucose	no	Anaerobic	.-	.-	Clostridium saccharoperbutylacetonicum			.	.	.	.
	70	Bacillus subtilis	NA	Prokaryotes	Bacteria	Firmicutes	Positive	pure	LB agar	Casein Tryptone	yes	Aerobic	.-	.-	Bacillus subtilis			.	.	.	.
	71	Caldalkalibacillus thermarum	NA	Prokaryotes	Bacteria	Firmicutes	Positive	pure	Defined	Casein Tryptone	yes	Aerobic	.-	Alkaliphile, Thermophile	Caldalkalibacillus thermarum			.	.	.	.
	72	Lactate producing enrichment (Streptococcus)	NA	Prokaryotes	Bacteria	Firmicutes	Positive	enriched	Defined, Mineral	Glucose	no	Anaerobic	.-	Mixed culture	Lactate producing enrichment (Streptococcus)			.	.	.	.
	73	Arthrospira platensis; A. (Spirulina)	NA	Prokaryotes	Bacteria	Cyanobacteria	Negative	pure	Defined	CO2	no	Aerobic	ULM-8453-PK	.-	Arthrospira platensis; A. (Spirulina)			.	.	.	.
	74	Nostoc punctiforme	NA	Prokaryotes	Bacteria	Cyanobacteria	Negative	pure	ES-KNO3 Agar	CO2	no	Aerobic	EPSAG 69.79	axenic	Nostoc punctiforme			.	.	.	.
	75	Microcystis cf aerginosa	NA	Prokaryotes	Bacteria	Cyanobacteria	Negative	pure	BG11 Medium	CO2	no	Aerobic	.-	.-	Microcystis cf aerginosa			.	.	.	.
	76	Geitlerinema, Nodosiliniea	NA	Prokaryotes	Bacteria	Cyanobacteria	Positive	enriched	Defined	CO2	no	Aerobic	.-	Alkaliphile, Halophile	Geitlerinema, Nodosiliniea			.	.	.	.
	77	Galacturonibacter Soeghenii	NA	Prokaryotes	Bacteria	Firmicutes	Positive	enriched	Defined, Mineral	Xylose	no	Aerobic	.-	.-	Galacturonibacter Soeghenii			.	.	.	.
	78	Methanobacterium enrichment	NA	Prokaryotes	Archaea	Methanobacteria	Archeal	enriched	Defined	NA	no	Aerobic	.-	.-	Methanobacterium enrichment			.	.	.	.
	79	Clostridium pasteurianum enrichment short SRT	NA	Prokaryotes	Bacteria	Firmicutes	Positive	enriched	Defined, Mineral	Glucose	no	Aerobic	.-	.-	Clostridium pasteurianum enrichment short SRT			.	.	.	.
	80	Clostridium pasteurianum enrichment long SRT	NA	Prokaryotes	Bacteria	Firmicutes	Positive	enriched	Defined, Mineral	Glucose	no	Aerobic	.-	.-	Clostridium pasteurianum enrichment long SRT			.	.	.	.
	81	Rhodopseudomonas palustris enrichment	NA	Prokaryotes	Bacteria	Alphaproteobacteria	Negative	enriched	Defined, Mineral	Glucose	no	Aerobic	.-	.-	Rhodopseudomonas palustris enrichment			.	.	.	.
	82	Citrobacter freundii enrichment	NA	Prokaryotes	Bacteria	Gammaproteobacteria	Positive	enriched	Defined, Mineral	Xylose	no	Aerobic	.-	.-	Citrobacter freundii enrichment			.	.	.	.
	83	Thiothrix	NA	Prokaryotes	Bacteria	Gamma Proteobacteria	Positive	enriched	Defined, Mineral	Acetate	no	Aerobic	.-	.-	Thiothrix			.	.	.	.
	84	Thiothrix + Pao	NA	Prokaryotes	Bacteria	Gamma Proteobacteria	Positive	enriched	Defined, Mineral	Acetate	no	Aerobic	.-	.-	Thiothrix + Pao			.	.	.	.
	85	Accumulibacter phosphatis	NA	Prokaryotes	Bacteria	Beta-proteobacteria	Diverse	enriched	Defined, Mineral	Acetate	no	Aerobic	.-	.-	Accumulibacter phosphatis			.	.	.	.
	86	Non-saline labscale AGS reactor I	NA	Prokaryotes	Bacteria	Beta-proteobacteria	Diverse	enriched	Defined, Mineral	Acetate	no	Aerobic	.-	.-	Non-saline labscale AGS reactor I			.	.	.	.
	87	Non-saline labscale AGS reactor II	NA	Prokaryotes	Bacteria	Beta-proteobacteria	Diverse	enriched	Defined, Mineral	Acetate	no	Aerobic	.-	.-	Non-saline labscale AGS reactor II			.	.	.	.
	88	Saline labscale AGS reactor	NA	Prokaryotes	Bacteria	Beta-proteobacteria	Diverse	enriched	Defined, Mineral	Acetate	yes	Aerobic	.-	.-	Saline labscale AGS reactor			.	.	.	.
	89	Dinxperlo fullscale AGS granules	NA	Prokaryotes	Bacteria	Community	Diverse	community	Wastewater treatment	Wastewater treatment plant	yes	Aerobic	.-	.-	Dinxperlo fullscale AGS granules			.	.	.	.
	90	Dinxperlo fullscale AGS flocs	NA	Prokaryotes	Bacteria	Community	Diverse	community	Wastewater treatment	Wastewater treatment plant	yes	Aerobic	.-	.-	Dinxperlo fullscale AGS flocs			.	.	.	.
	91	Fullscale Anarobic dig. I	NA	Prokaryotes	Bacteria	Community	Diverse	community	Wastewater treatment	Wastewater treatment plant	yes	Anaerobic	.-	.-	Fullscale Anarobic dig. I			.	.	.	.
	92	Fullscale Anarobic dig. II	NA	Prokaryotes	Bacteria	Community	Diverse	community	Wastewater treatment	Wastewater treatment plant	yes	Anaerobic	.-	.-	Fullscale Anarobic dig. II			.			.
		Notes to reference compounds, postive / negative controls used for method deveolpment
		Additional info to column Q (sheet-3)
		Method NEG control.	Test method for system related false positive interferences.
		Method POS control.	Test method for false negatives, by using pure sialic acid reference material (commercial) and cell lysate spiking (recovery) experiments.
		Method procedure control.	Test method for individual sample prepartion steps and bulk matrix interference.
		Animal cell material POS control.	Animal cell material positive control. Use of cell material with differential contents of animal-type sialic acids
		Microbial cell material NEG control.	Microbial cell material negative control, to test for backgrouninterferrence
		Microbial cell material POS control	Cell material positive control, using cell material with differential contents of animal-type sialic acids
		Global sialic acid / nonulosonic acid literature
		1. Lewis, Amanda L., et al. "Innovations in host and microbial sialic acid biosynthesis revealed by phylogenomic prediction of nonulosonic acid structure." Proceedings of the National Academy of Sciences 106.32 (2009): 13552-13557.	Genetic reference study showing wide phylogenetic occurance of nonulosonic acid biosynthesis pathways.
		2. Schauer, Roland, and Johannis P. Kamerling. "Exploration of the sialic acid world." Advances in carbohydrate chemistry and biochemistry. Vol. 75. Academic Press, 2018. 1-213.	Reference collection covering many sialic acids and nonulosonic acid related compounds identified to date (2019).

## Sheet: 4. FRAG FREQUENCY
	[M+H+]+	C	H	N	O	Ccore	Hcore	RDBE	RDBEcor	C-No	# Occurances
	253.061	14	9	2	3	5	2	5	5	7	637
	255.077	14	11	2	3	5	4	4	4	7	1060				1. Extract MS2 scans which contain core fragments								NOTES
	257.092	14	13	2	3	5	6	3	3	7	445												INPUT
	271.072	14	11	2	4	5	4	4	5	7	1474												ms2data	(MS2 peaks)x5 double, [scan number, channel, retention time, mass, intensity]
	273.087	14	13	2	4	5	6	3	4	7	522												transitions	UA fragment feature table, supplied as .csv file (only core selected, 1-4)
	275.103	14	15	2	4	5	8	2	3	7	60												fmppm	allowed mass error (ppm =15) to extract fragments
	289.082	14	13	2	5	5	6	3	5	7	617												OUTPUT
	291.098	14	15	2	5	5	8	2	4	7	399												extfrag	double containing rows of SCAN number, CHANNEL and identified core fragment
	293.113	14	17	2	5	5	10	1	3	7	34
	307.093	14	15	2	6	5	8	2	5	7	393
	309.108	14	17	2	6	5	10	1	4	7	855				2. Create a chemical (compound) space using the predefined elemental constraints										C	H	N	O	P	S
	311.124	14	19	2	6	5	12	0	3	7	91				See SI-table sheet 9: '4. Create a chemical (compound) space using the predefined elemental constraints'									exactm	12	1.00783	14.0031	15.9949	30.9738	31.9721
	265.061	15	9	2	3	6	2	6	6	8	470													mincount	10	9	2	3	0	0
	267.077	15	11	2	3	6	4	5	5	8	848													maxcount	17	19	2	6	0	0
	269.092	15	13	2	3	6	6	4	4	8	851
	283.072	15	11	2	4	6	4	5	6	8	2820
	285.087	15	13	2	4	6	6	4	5	8	910				3. Align identified MS2 scans with MS1 scans, to keep only scans which also show at least one realistic parent mass candidate
	287.103	15	15	2	4	6	8	3	4	8	232				See SI-table sheet 9: '3. Align MS2 scans (containing UA fragments) with potential parents of neighbouring MS1 scans'
	301.082	15	13	2	5	6	6	4	6	8	1879
	303.098	15	15	2	5	6	8	3	5	8	341
	305.113	15	17	2	5	6	10	2	4	8	47
	319.093	15	15	2	6	6	8	3	6	8	593				4. Assign chemical compositions to fragments in MS2 scans matching the chemical space
	321.108	15	17	2	6	6	10	2	5	8	378												INPUT
	323.124	15	19	2	6	6	12	1	4	8	43												Combined	(matrix, one line for every MS2 scan ID) identified scans from function 1, which passed alignment criteria (=potential parent masses present)
	277.061	16	9	2	3	7	2	7	7	9	203												allminecomp	Chemical space created in function 2, considering the given elemental constraints
	279.077	16	11	2	3	7	4	6	6	9	205												ms2data	(MS2 peaks)x5 double, [scan number, channel, retention time, mass, intensity]
	281.092	16	13	2	3	7	6	5	5	9	40												form_ppm	Max allowed mass error, 5ppm
	295.072	16	11	2	4	7	4	6	7	9	1742
	297.087	16	13	2	4	7	6	5	6	9	1159
	299.103	16	15	2	4	7	8	4	5	9	162
	313.082	16	13	2	5	7	6	5	7	9	1954
	315.098	16	15	2	5	7	8	4	6	9	388
	317.113	16	17	2	5	7	10	3	5	9	44
	331.093	16	15	2	6	7	8	4	7	9	546												OUTPUT
	333.108	16	17	2	6	7	10	3	6	9	31												matched (double with identified scans including chemical compositions)
	335.124	16	19	2	6	7	12	2	5	9	40												further filtered for the chemical UA space candidates (3O-6O, different degrees of saturation) with carbon lengths of 7, 8, 9 and potential higher
	289.061	17	9	2	3	8	2	8	8	10	45
	291.077	17	11	2	3	8	4	7	7	10	160
	293.092	17	13	2	3	8	6	6	6	10	73
	307.072	17	11	2	4	8	4	7	8	10	75
	309.087	17	13	2	4	8	6	6	7	10	220
	311.103	17	15	2	4	8	8	5	6	10	102
	325.082	17	13	2	5	8	6	6	8	10	43
	327.098	17	15	2	5	8	8	5	7	10	113
	329.113	17	17	2	5	8	10	4	6	10	22
	343.093	17	15	2	6	8	8	5	8	10	44
	345.108	17	17	2	6	8	10	4	7	10	46
	347.124	17	19	2	6	8	12	3	6	10	16

## Sheet: 5. SMALL M DIA INCLUSION LIST
INCLUSION LIST
52 entries
Mass Formula Species CS Polarity Start End (N)CE MSX ID Comment
[m/z] [M] [z] [min] [min]
380.00000 Positive
382.75000 Positive
385.50000 Positive
388.25000 Positive
391.00000 Positive
393.75000 Positive
396.50000 Positive
399.25000 Positive
402.00000 Positive
404.75000 Positive
407.50000 Positive
410.25000 Positive
413.00000 Positive
415.75000 Positive
418.50000 Positive
421.25000 Positive
424.00000 Positive
426.75000 Positive
429.50000 Positive
432.25000 Positive
435.00000 Positive
437.75000 Positive
440.50000 Positive
443.25000 Positive
446.00000 Positive
448.75000 Positive
451.50000 Positive
454.25000 Positive
457.00000 Positive
459.75000 Positive
462.50000 Positive
465.25000 Positive
468.00000 Positive
470.75000 Positive
473.50000 Positive
476.25000 Positive
479.00000 Positive
481.75000 Positive
484.50000 Positive
487.25000 Positive
490.00000 Positive
492.75000 Positive
495.50000 Positive
498.25000 Positive
501.00000 Positive
503.75000 Positive
506.50000 Positive
509.25000 Positive
512.00000 Positive
514.75000 Positive
517.50000 Positive
520.25000 Positive
EXCLUSION LIST
(no entries)
NEUTRAL LOSSES
(no entries)
MASS TAGS
(no entries)

## Sheet: 6. POT. PARENT ANNOTATIONS
	Frequency	Class	C	H	N	O	Formula mass	Bacterial-type	NEU-type	Listed in Schauer et al.		CID	Theoretical composition space	.
	4	9	23	28	4	10	520.181	4	0	NA	NA	NA	X3Ac1Fo dHydroNeu2AcAla dHydroNeu1GcPro dHydroX2Ac1Pr dOxyNeu2Ac1Fo1Am dOxyX2Ac1Fo1Gc dAmidX2Ac1Fo1Am dHydroNeu1Hb1Fo1Am dHydroNeu1Ac1Am1Lt dHydroNeu1Me2AcGly dHydroX1Hb1Fo1Gc dHydroX1Ac1Gc1Lt dHydroKdn1Ac1AmAla dHydroNeu1Me1Fo1Am1Lt dHydroNeu1Me1Ac1Am1Gc dHydroNeu1Me1Ac1FoAla dHydroNeu2Me1Ac1FoGly dHydroX1Me1Fo1Gc1Lt dHydroX1Me1Ac1Pr1Fo dHydroKdn1Me1Fo1AmAla dHydroKdn1Me1Ac1AmGly dHydroKdn2Me1Fo…	.
	1	9	22	30	4	10	510.196	1	0	AcdiHB	Pse/Leg	NA	Neu1Hb1Am Neu1FoVal X1Hb1Gc HydroX3Ac Neu1Me1Am1Lt Neu2Me1Am1Gc Neu1Me1AcAla Neu2Me1FoAla Neu2Me1AcGly Neu3Me1FoGly OxyNeu1MePro X1Me1Gc1Lt X1Me1Ac1Pr X2Me1Pr1Fo OxyX1Ac1Hb dHydroXHex Kdn1Me1AmAla Kdn2Me1AmGly AmidNeu1Ac1Hb dOxyNeu1LtAla dOxyNeu2MeAsp dOxyNeu1MeGlu dOxyNeu1HbGly dOxyNeu1AcThr dOxyX1Pr1Lt dOxyX1FoXyl AmidKdn1Hb1Am dOxyKdn2MeAsn dOxyKdn1MeGln dOxyKdn1AmThr AmidKdn1FoVal dAmidX1LtAl…	.
	11	9	22	27	3	11	509.165	0	11	Ac3	Neu	1NA1135556 1NA1263994	Neu3Ac Kdn2Ac1Am Kdn1FoPro AmidKdn3Ac Neu1Me2Ac1Fo dOxyNeu2Ac1Gc dOxyKdn2AcGly dAmidNeu2Ac1Am dAmidNeu1FoPro dAmidX2Ac1Gc dHydroNeu1Hb1Gc Kdn1Me1Ac1Fo1Am dHydroKdn1LtAla dHydroKdn2MeAsp dHydroKdn1MeGlu dHydroKdn1HbGly dHydroKdn1AcThr dOxyNeu1Ac1Fo1Lt AmidKdn1Me2Ac1Fo dOxyKdn1Fo1Am1Lt dOxyKdn1Ac1Am1Gc dOxyKdn1Ac1FoAla dAmidX1Ac1Fo1Lt dHydroNeu1Me1Gc1Lt dHydroNeu1Me1Ac1Pr dHydroNeu2Me1Pr1Fo dHydroK…	.
	1	9	23	32	4	9	508.217	1	0	NA	NA	NA	Neu2MePro X1Me1Ac1Hb X2Me1Hb1Fo X2Me1Ac1Lt dOxyNeu1FoLeu dOxyNeu1AcVal dOxyX1Hb1Lt AmidKdn2MePro dOxyKdn1AmVal dAmidX1FoLeu dAmidX1AcVal dHydroNeu3MeThr dHydroX2MeXyl dHydroX1MeFuc dHydroKdn1MeLys dOxyNeu1Me1Hb1Am dOxyNeu2Me1Am1Lt dOxyNeu2Me1AcAla dOxyNeu3Me1FoAla dOxyNeu3Me1AcGly dOxyNeu1Me1FoVal dOxyX1Me1Hb1Gc dOxyX2Me1Gc1Lt dOxyX2Me1Ac1Pr dOxyKdn2Me1AmAla dOxyKdn3Me1AmGly dAmidX1Me1Hb1Am dAmid…	.
	4	9	23	30	4	9	506.201	4	0	NA	NA	NA	X1Me3Ac dOxyNeu1AcPro dOxyX2Ac1Lt dOxyKdn1AmPro dAmidX1AcPro dHydroNeu1FoLeu dHydroNeu1AcVal dHydroX1Hb1Lt dHydroKdn1AmVal dOxyNeu1Me2Ac1Am dOxyNeu1Me1FoPro dOxyX1Ac1Hb1Fo dOxyX1Me2Ac1Gc dAmidX1Me2Ac1Am dAmidX1Me1FoPro dHydroNeu1Me1Hb1Am dHydroNeu2Me1Am1Lt dHydroNeu2Me1AcAla dHydroNeu3Me1FoAla dHydroNeu3Me1AcGly dHydroNeu1Me1FoVal dHydroX1Me1Hb1Gc dHydroX2Me1Gc1Lt dHydroX2Me1Ac1Pr dHydroKdn2Me1Am…	.
	2	9	22	26	4	10	506.165	2	0	NA	NA	NA	dHydroNeu2AcGly dHydroNeu1Fo1Am1Lt dHydroNeu1Ac1Am1Gc dHydroNeu1Ac1FoAla dHydroX1Fo1Gc1Lt dHydroX1Ac1Pr1Fo dHydroKdn1Fo1AmAla dHydroKdn1Ac1AmGly dHydroNeu1Me1Fo1Am1Gc dHydroNeu1Me1Ac1FoGly dHydroKdn1Me1Fo1AmGly	.
	1	9	23	26	4	9	502.17	1	0	NA	NA	NA	dHydroX3Ac1Fo	.
	2	9	20	28	3	12	502.167	2	0	NA	NA	NA	NA	.
	3	9	21	28	4	10	496.18	3	0	AcPr	Pse/Leg	NA	Neu1Am1Lt Neu1AcAla OxyNeuPro X1Gc1Lt X1Ac1Pr Kdn1AmAla dOxyNeuGlu dOxyKdnGln dAmidXGlu Neu1Me1Am1Gc Neu1Me1FoAla Neu1Me1AcGly Neu2Me1FoGly X1Me1Pr1Fo OxyX1Hb1Fo OxyX1Ac1Lt Kdn1Me1AmGly AmidNeu1Hb1Fo AmidNeu1Ac1Lt dOxyNeu1Pr1Am dOxyNeu1GcAla dOxyNeu1MeAsp dOxyNeu1LtGly dOxyNeu1AcSer dOxyNeu1FoThr dOxyX1Pr1Gc AmidKdn1Am1Lt AmidKdn1AcAla dOxyKdn1MeAsn dOxyKdn1AmSer dAmidNeu1AmAla dAmidX1Pr1Am Hydro…	.
	2	9	22	30	4	9	494.201	2	0	AcHb	Pse/Leg	127561	Neu1MePro X1Ac1Hb Neu2Me1Ac1Am X1Me1Hb1Fo X1Me1Ac1Lt X2Me1Fo1Lt X2Me1Ac1Gc OxyX2Me2Ac dHydroXFuc dHydroKdnLys AmidNeu2Me2Ac dOxyNeu1Hb1Am dOxyNeu1FoVal dOxyX1Hb1Gc AmidKdn1MePro dAmidX1Hb1Am dAmidX1FoVal dHydroNeu3MeSer dHydroNeu2MeThr dHydroX1MeXyl dOxyNeu1Me1Am1Lt dOxyNeu2Me1Am1Gc dOxyNeu1Me1AcAla dOxyNeu2Me1FoAla dOxyNeu2Me1AcGly dOxyNeu3Me1FoGly dOxyX1Me1Gc1Lt dOxyX1Me1Ac1Pr dOxyX2Me1Pr1Fo Am…	.
	4	9	22	28	4	9	492.186	3	1	Ac3	Pse/Leg	NA	X3Ac X1Me2Ac1Fo dOxyNeu2Ac1Am dOxyNeu1FoPro dOxyX2Ac1Gc dAmidX2Ac1Am dAmidX1FoPro dHydroNeu1Hb1Am dHydroNeu1FoVal dHydroX1Hb1Gc dOxyX1Ac1Fo1Lt dHydroNeu1Me1Am1Lt dHydroNeu2Me1Am1Gc dHydroNeu1Me1AcAla dHydroNeu2Me1FoAla dHydroNeu2Me1AcGly dHydroNeu3Me1FoGly dHydroX1Me1Gc1Lt dHydroX1Me1Ac1Pr dHydroX2Me1Pr1Fo dHydroKdn1Me1AmAla dHydroKdn2Me1AmGly dOxyNeu1Me1Ac1Fo1Am dOxyX1Me1Ac1Fo1Gc dAmidX1Me1Ac1Fo…	.
	10	9	20	25	3	11	483.149	0	10	AcGc	Neu	1NA2144NA4NA	Neu1Fo1Lt Neu1Ac1Gc OxyNeu2Ac Kdn1Am1Gc Kdn1FoAla Kdn1AcGly dOxyKdnAsp Neu1Me1Fo1Gc OxyKdn1Ac1Am Kdn1Me1FoGly dOxyNeu1Pr1Fo AmidKdn1Fo1Lt AmidKdn1Ac1Gc dOxyKdn1GcGly dOxyKdn1FoSer dAmidNeu1Am1Gc dAmidNeu1FoAla dAmidNeu1AcGly dAmidX1Pr1Fo dAmidKdn1AmGly OxyNeu1Me1Ac1Fo OxyKdn1Me1Fo1Am AmidKdn1Me1Fo1Gc dAmidNeu1Me1FoGly	.
	1	9	21	27	3	10	481.17	0	1	Ac2Me	Neu	117679711 1NA17NA7474	KdnPro Neu1Me2Ac dAmidNeuPro Neu2Me1Ac1Fo Kdn1Me1Ac1Am Kdn2Me1Fo1Am dOxyNeu1Hb1Fo dOxyNeu1Ac1Lt AmidKdn1Me2Ac dOxyKdn1Am1Lt dOxyKdn1AcAla dAmidX1Hb1Fo dAmidX1Ac1Lt dHydroNeu2Me1Pr dHydroKdn2MeSer dHydroKdn1MeThr dOxyNeu1Me1Fo1Lt dOxyNeu1Me1Ac1Gc dOxyNeu2Me1Fo1Gc AmidKdn2Me1Ac1Fo dOxyKdn1Me1Am1Gc dOxyKdn1Me1FoAla dOxyKdn1Me1AcGly dOxyKdn2Me1FoGly dAmidNeu1Me1Ac1Am dAmidNeu2Me1Fo1Am dAmidX1Me1Fo1Lt…	.
	5	9	23	31	2	9	479.203	5	0	NA	NA	NA	NA	.
	5	9	21	29	5	8	479.202	5	0	NA	NA	NA	X1Am1Lt X1AcAla OxyXPro AmidNeuPro dOxyXGlu X1Me1Am1Gc X1Me1FoAla X1Me1AcGly X2Me1FoGly dOxyNeu1AmAla AmidX1Hb1Fo AmidX1Ac1Lt dOxyX1Pr1Am dOxyX1GcAla dOxyX1MeAsp dOxyX1LtGly dOxyX1AcSer dOxyX1FoThr dAmidX1AmAla OxyX1Me1Ac1Am OxyX2Me1Fo1Am AmidNeu1Me1Ac1Am AmidNeu2Me1Fo1Am dOxyNeu1Me1AmGly AmidX1Me1Fo1Lt AmidX1Me1Ac1Gc AmidX2Me1Fo1Gc dOxyX1Me1GcGly dOxyX1Me1FoSer dAmidX1Me1AmGly	.
	2	9	22	30	4	8	478.206	2	0	NA	NA	NA	X2Me2Ac dHydroNeuLeu dOxyNeu1MePro dOxyX1Ac1Hb dAmidX1MePro dHydroNeu3MeAla dHydroNeu1MeVal dHydroX3Me1Pr dOxyNeu2Me1Ac1Am dOxyX1Me1Hb1Fo dOxyX1Me1Ac1Lt dOxyX2Me1Fo1Lt dOxyX2Me1Ac1Gc dAmidX2Me1Ac1Am	.
	25	9	20	25	3	10	467.154	0	25	Ac2	Neu	72941513 1421458NA 1NA166977NA	Neu2Ac Kdn1Ac1Am AmidKdn2Ac Neu1Me1Ac1Fo Kdn1Me1Fo1Am dHydroKdnThr dOxyNeu1Fo1Lt dOxyNeu1Ac1Gc dOxyKdn1Am1Gc dOxyKdn1FoAla dOxyKdn1AcGly dAmidNeu1Ac1Am dAmidX1Fo1Lt dAmidX1Ac1Gc dHydroNeu1Me1Pr dHydroKdn1MeSer dOxyNeu1Me1Fo1Gc AmidKdn1Me1Ac1Fo dOxyKdn1Me1FoGly dAmidNeu1Me1Fo1Am dAmidX1Me1Fo1Gc	.
	2	9	21	30	4	8	466.206	2	0	NA	NA	NA	Neu3Me1Am X1Me1Hb X2Me1Lt X3Me1Gc dOxyNeuVal dAmidXVal OxyX3Me1Ac AmidNeu3Me1Ac dOxyNeu2MeAla dOxyNeu3MeGly dOxyX2Me1Pr AmidKdn3Me1Am dAmidX2MeAla dAmidX3MeGly	.
	2	9	22	29	2	9	465.187	2	0	NA	NA	NA	NA	.
	2	9	20	27	5	8	465.186	2	0	NA	NA	NA	X1Am1Gc X1FoAla X1AcGly dOxyXAsp OxyX1Ac1Am X1Me1FoGly AmidNeu1Ac1Am dOxyNeu1AmGly AmidX1Fo1Lt AmidX1Ac1Gc dOxyX1GcGly dOxyX1FoSer dAmidX1AmGly OxyX1Me1Fo1Am AmidNeu1Me1Fo1Am AmidX1Me1Fo1Gc	.
	1	9	22	30	3	8	464.203	1	0	NA	NA	NA	NA	.
	1	9	21	28	4	8	464.191	1	0	NA	NA	NA	X1Me2Ac dOxyNeuPro dAmidXPro dHydroNeuVal X2Me1Ac1Fo dOxyX1Hb1Fo dOxyX1Ac1Lt dHydroNeu2MeAla dHydroNeu3MeGly dHydroX2Me1Pr dOxyNeu1Me1Ac1Am dOxyNeu2Me1Fo1Am dOxyX1Me1Fo1Lt dOxyX1Me1Ac1Gc dOxyX2Me1Fo1Gc dAmidX1Me1Ac1Am dAmidX2Me1Fo1Am	.
	1	9	23	31	2	8	463.208	1	0	NA	NA	NA	NA	.
	1	9	21	29	5	7	463.207	1	0	AcAmMe	Pse/Leg	NA	XPro X1Me1Ac1Am X2Me1Fo1Am AmidX1Me2Ac dOxyX1Am1Lt dOxyX1AcAla dHydroX2MeSer dHydroX1MeThr AmidX2Me1Ac1Fo dOxyX1Me1Am1Gc dOxyX1Me1FoAla dOxyX1Me1AcGly dOxyX2Me1FoGly	.
	1	9	22	27	2	9	463.172	0	1	NA	NA	NA	NA	.
	1	9	23	30	3	7	460.208	1	0	NA	NA	NA	NA	.
	2	9	19	22	2	11	454.122	0	2	NA	NA	NA	Kdn1Ac1Fo dHydroKdn1Pr dOxyKdn1Fo1Gc dAmidNeu1Ac1Fo dAmidKdn1Fo1Am	.
	2	9	19	23	3	10	453.138	2	0	NA	NA	NA	Neu1Ac1Fo Kdn1Fo1Am dHydroNeu1Pr dHydroKdnSer dOxyNeu1Fo1Gc AmidKdn1Ac1Fo dOxyKdn1FoGly dAmidNeu1Fo1Am dAmidX1Fo1Gc	.
	26	9	20	26	4	8	450.175	24	2	Ac2	Pse/Leg	53463699	X2Ac X1Me1Ac1Fo dOxyNeu1Ac1Am dOxyX1Fo1Lt dOxyX1Ac1Gc dAmidX1Ac1Am dHydroNeu1MeAla dHydroNeu2MeGly dHydroX1Me1Pr dOxyNeu1Me1Fo1Am dOxyX1Me1Fo1Gc dAmidX1Me1Fo1Am	.
	7	9	22	29	2	8	449.192	7	0	NA	NA	NA	NA	.
	7	9	20	27	5	7	449.191	7	0	AcAm	Pse/Leg	129877163	X1Ac1Am AmidX2Ac X1Me1Fo1Am dHydroXThr dOxyX1Am1Gc dOxyX1FoAla dOxyX1AcGly dHydroX1MeSer AmidX1Me1Ac1Fo dOxyX1Me1FoGly	.
	5	9	20	23	3	9	449.143	0	5	dehydro	NA	NA	dHydroNeu2Ac dHydroKdn1Ac1Am dHydroNeu1Me1Ac1Fo dHydroKdn1Me1Fo1Am	.
	3	9	21	28	4	7	448.196	3	0	NA	NA	87327558	dOxyX1Me2Ac dHydroNeu3Me1Am dHydroX1Me1Hb dHydroX2Me1Lt dHydroX3Me1Gc dOxyX2Me1Ac1Fo	.
	1	9	18	25	4	9	441.162	0	1	NA	NA	NA	NA	.
	15	9	18	23	3	10	441.138	0	15	Gc	Neu	6NA16NA6NANA 299654 1NA1141241 1NANA967658	Neu1Gc KdnGly OxyNeu1Ac OxyKdn1Am AmidKdn1Gc dAmidNeuGly OxyNeu1Me1Fo	.
	2	9	19	24	2	10	440.143	0	2	NA	NA	NA	Kdn1Me1Ac Kdn2Me1Fo dOxyKdn1Lt dOxyKdn1Me1Gc dAmidNeu1Me1Ac dAmidNeu2Me1Fo dAmidKdn1Me1Am	.
	1	9	19	29	5	7	439.207	0	1	NA	NA	NA	HydroX1Me1Am	.
	11	9	19	25	3	9	439.159	0	11	AcMe	Neu	59366497 1297NA8771 1NA193646NA 1NA17NA7473 1297NA8632 1NA253347NA	Neu1Me1Ac Neu2Me1Fo Kdn1Me1Am dOxyNeu1Lt dOxyKdnAla dAmidX1Lt dOxyNeu1Me1Gc AmidKdn1Me1Ac AmidKdn2Me1Fo dOxyKdn1MeGly dAmidNeu1Me1Am dAmidX1Me1Gc	.
	1	9	19	26	4	8	438.175	0	1	NA	NA	7NA924279	X1Lt Neu1Me1Am X1Me1Gc dOxyNeuAla dOxyX1Pr dAmidXAla OxyX1Me1Ac OxyX2Me1Fo AmidNeu1Me1Ac AmidNeu2Me1Fo dOxyNeu1MeGly AmidKdn1Me1Am dAmidX1MeGly	.
	17	9	20	24	4	7	432.164	17	0	dehydro	NA	NA	dHydroX2Ac dHydroX1Me1Ac1Fo	.
	1	9	17	22	2	11	430.122	1	0	NA	NA	NA	HydroKdn1Fo	.
	3	9	18	24	3	9	426.151	0	3	NA	NA	NA	NA	.
	2	9	18	22	2	10	426.127	0	2	Ac	Kdn	1353NA6459 1353NA6444 1353NA6449 1353NA6441 78174NA34	Kdn1Ac Kdn1Me1Fo dOxyKdn1Gc dAmidNeu1Ac dAmidKdn1Am dAmidNeu1Me1Fo	.
	58	9	18	23	3	9	425.143	2	56	Ac	Neu	14NA17587 129878NANA4 1NA16177NA9 1NA161771NA 1NA1617711	Neu1Ac Kdn1Am Neu1Me1Fo dOxyNeu1Gc AmidKdn1Ac dOxyKdnGly dAmidNeu1Am dAmidX1Gc AmidKdn1Me1Fo	.
	4	9	18	21	3	9	423.128	0	4	dehydro	NA	NA	dHydroNeu1Gc dHydroKdnGly	.
	1	9	17	23	3	9	413.143	0	1	NA	NA	NA	OxyNeu1Me	.
	9	9	18	23	3	8	409.149	9	0	doxy	NA	445523 137552879	dOxyNeu1Ac dOxyKdn1Am dAmidX1Ac dOxyNeu1Me1Fo dAmidX1Me1Fo	.
	1	9	18	24	4	7	408.164	1	0	NA	NA	NA	X1Ac X1Me1Fo dOxyNeu1Am dOxyX1Gc dAmidX1Am	.
	4	9	18	21	3	8	407.133	0	4	dehydro	NA	NA	dHydroNeu1Ac dHydroKdn1Am dHydroNeu1Me1Fo	.
	2	9	17	22	2	9	398.132	0	2	Me	Kdn	1353NA6457 1353NA645NA 1353NA6458 1353NA6451 1353NA6446 1NA1689263	Kdn1Me dAmidNeu1Me	.
	3	9	17	23	3	8	397.149	1	2	NA	NA	91177NA4NA	Neu1Me AmidKdn1Me	.
	28	9	16	20	2	9	384.117	0	28	unmod	Kdn	22833524 87684967 129677347	Kdn dAmidNeu	.

## Sheet: 7. NAB BLAST SEARCH
						Ids >= 33%					KDN_BT_NAB1		KDN_BT_NAB2		NEU_Ecoli_NAB1		NEU_Ecoli_NAB2		NEU_HS_NAB1		NEU_HS_NAB2		PSE_CJ_NAB1		PSE_CJ_NAB2		LEG_CJ_NAB1		LEG_CJ_NAB2
	Number in Figure 2B	Sample No	Species/Sample name	Phylum	Species search	Kdn	Neu	Pse	Leg	Total	Accession	Ids%	Accession	Ids%	Accession	Ids%	Accession	Ids%	Accession	Ids%	Accession	Ids%	Accession	Ids%	Accession	Ids%	Accession	Ids%	Accession	Ids%
	1	1	DMB blank	Artificial	none	0	0	0	0	0	ND	0	ND	0	ND	0	ND	0	ND	0	ND	0	ND	0	ND	0	ND	0	ND	0
	2	14	STD2:K12 1:5 pre	Artificial	none	0	0	0	0	0	ND	0	ND	0	ND	0	ND	0	ND	0	ND	0	ND	0	ND	0	ND	0	ND	0
	3	18	HELA cells (No Serum)	Chordata	Homo sapiens	1	4	2	2	9	ND	0	AAH19315	29.3605	AAH16609	27.907	NP_061819	36.3905	NP_061156	100	NP_061819	100	AAH16609	31.8436	NP_061819	31.6418	BAD96701	25.8929	NP_061819	35.3474
	4	19	HELA cells (Serum grown)	Chordata	Homo sapiens	1	4	2	2	9	ND	0	AAH19315	29.3605	AAH16609	27.907	NP_061819	36.3905	NP_061156	100	NP_061819	100	AAH16609	31.8436	NP_061819	31.6418	BAD96701	25.8929	NP_061819	35.3474
	5	21	Arabidopsis thaliana	Flowering plant	Arabidopsis thaliana	0	0	1	0	1	ND	0	ND	0	NP_175708	22.5434	ND	0	ND	0	ND	0	NP_175708	30.3571	ND	0	ND	0	ND	0
	6	22	Nicotiana benthamiana	Flowering plant	Nicotiana benthamiana	0	0	0	0	0	ND	0	ND	0	ND	0	ND	0	ND	0	ND	0	ND	0	ND	0	ND	0	ND	0
	7	23	Saccharomyces cerevisiae	Fungi	Saccharomyces cerevisiae	0	0	0	0	0	ND	0	ND	0	ND	0	ND	0	ND	0	ND	0	ND	0	ND	0	ND	0	ND	0
	8	26	Chlamydomonas reinhardtii I	Alagae	Chlamydomonas Reinhardtii	0	0	0	0	0	ND	0	ND	0	ND	0	ND	0	ND	0	ND	0	ND	0	ND	0	ND	0	ND	0
	9	27	Chlamydomonas reinhardtii II	Alagae	Chlamydomonas Reinhardtii	0	0	0	0	0	ND	0	ND	0	ND	0	ND	0	ND	0	ND	0	ND	0	ND	0	ND	0	ND	0
	10	24	Cryptomonas spec.	Alagae	Cryptomonas	0	0	0	0	0	ND	0	ND	0	ND	0	ND	0	ND	0	ND	0	ND	0	ND	0	ND	0	ND	0
	11	29	Asterionella formosa	Alagae	Asterionella formosa	0	0	0	0	0	ND	0	ND	0	ND	0	ND	0	ND	0	ND	0	ND	0	ND	0	ND	0	ND	0
	12	31	Diatoma sp	Alagae	Diatoma	0	0	0	0	0	ND	0	ND	0	ND	0	ND	0	ND	0	ND	0	ND	0	ND	0	ND	0	ND	0
	13	33	Alexandrium ostenfeldii strain I	Alveolata	Alexandrium ostenfeldii	0	0	0	0	0	ND	0	ND	0	ND	0	ND	0	ND	0	ND	0	ND	0	ND	0	ND	0	ND	0
	14	34	Alexandrium ostenfeldii strain II	Alveolata	Alexandrium ostenfeldii	0	0	0	0	0	ND	0	ND	0	ND	0	ND	0	ND	0	ND	0	ND	0	ND	0	ND	0	ND	0
	15	25	Cricophaera carterae	Alagae	Cricosphaera roscoffensis	0	0	0	0	0	ND	0	ND	0	ND	0	ND	0	ND	0	ND	0	ND	0	ND	0	ND	0	ND	0
	16	32	Galdieria sulphuraria	Red alagae	Galdieria sulphuraria	0	1	0	0	1	ND	0	ND	0	ND	0	ND	0	XP_005706001	26.7717	ND	0	ND	0	ND	0	ND	0	ND	0
	17	35	Haloferax volcanii	Euryarchaeota	Haloferax volcanii	0	0	0	0	0	ND	0	ND	0	ND	0	ND	0	ND	0	ND	0	ND	0	ND	0	ND	0	ND	0
	18	38	Halorhabdus tiamatea	Euryarchaeota	Halorhabdus tiamatea	1	3	2	1	7	ND	0	WP_008524260	28.6119	WP_008524258	41.2844	WP_008524260	32.7586	WP_008524258	24.159	WP_008524260	27.9883	WP_008524258	28.2158	WP_008524260	30.4709	WP_008524258	24.1228	WP_008524260	36.1516
	19	80	Methanobacterium enrichment	Euryarchaeota	Methanococcales	2	4	2	2	10	WP_010870576	32.5203	WP_007043592	35.3116	BAP60495	41.8182	BAP60493	50	WP_007043591	35.5856	WP_010870578	39.528	WP_011973135	35.9649	AXI25871	48.1707	BAP60495	35.1931	BAP60493	63.3333
	20	40	Scalindua, marine anammox	Planktomycetes	Scalindua	2	4	2	2	10	ODS33748	25.4032	ODS33761	32.8571	RZV98945	31.6964	ODS33743	37.7522	RZV98945	28.7554	RZV98939	38.4384	RZV98945	28.2609	KHE90627	45.0617	RZV98945	29.8701	ODS33743	39.4578
	21	39	Nitrospira moscoviensis	Nitrospirae	Nitrospira moscoviensis	0	2	1	0	3	ND	0	ND	0	WP_053380671	30.303	ND	0	ALA59870	36.4238	ND	0	WP_053380671	27.0492	ND	0	ND	0	ND	0
	22	68	Clostridium saccharoperbutylacetonicum	Firmicutes	Clostridium saccharoperbutylacetonicum SC	0	0	0	0	0	ND	0	ND	0	ND	0	ND	0	ND	0	ND	0		0	ND	0	ND	0	ND	0
	23	86	Thiothrix + Pao	Gamma Proteobacteria	Thiothrix	1	4	2	2	9	ND	0	EIJ34212	31.2865	EIJ34216	32.3144	EIJ34212	46.7066	OQX16865	33.3333	EIJ34212	36.6667	OQX16865	47.9821	OQX16868	42.5595	EIJ34216	55.1724	EIJ34212	57.7982
	24	58	Pseudomonas putida	Gamma-proteobacteria	Pseudomonas putida	1	4	2	2	9	ND	0	WP_058541041	32.6471	WP_133330939	36.1991	WP_043862687	39.8876	WP_099453248	25.2451	WP_023533950	36.3905	WP_084855138	50.8772	WP_074687531	44.7059	WP_058541040	30.0885	WP_133330945	48
	25	56	Escherichia Coli BW 25113	Gamma-proteobacteria	Escherichia coli BW25113	0	0	0	0	0	ND	0	ND	0	ND	0	ND	0	AIN31386	24.7748	ND	0	AIN31386	24.2188	ND	0	ND	0	ND	0
	26	60	Myxococcus xanthus	Delta-proteobacteria	Myxococcus xanthus	1	1	0	0	2	ND	0	WP_011556010	26.7081	ND	0	ND	0	WP_140860878	29.3333	ND	0	ND	0	ND	0	ND	0	ND	0
	27	52	Acidovorax Avenae	Beta-proteobacteria	Acidovorax avenae subsp. avenae	0	1	1	0	2	ND	0	ND	0	ND	0	ND	0	AVS90156	26	ND	0	AVS62429	32.0988	ND	0	ND	0	ND	0
	28	66	Streptomyces coelicolor	Actinomycetes	Streptomyces coelicolor	1	4	2	2	9	ND	0	WP_003974091	35.206	WP_011029924	34.5455	WP_003974091	33.5593	WP_011029924	29.1358	WP_003974091	39.661	WP_011029924	34.5455	WP_003974091	31.2977	WP_011029924	26.4706	WP_003974091	34.4948
	29	65	Mycobacterium smegmatis	Actinomycetes	Mycobacterium smegmatis	0	0	0	0	0	ND	0	ND	0	ND	0	ND	0	ND	0	ND	0	ND	0	ND	0	ND	0	ND	0
	30	74	Arthrospira platensis; A. (Spirulina)	Cyanobacteria	Arthrospira platensis	0	2	0	0	2	ND	0	ND	0	WP_014273897	29.7674	ND	0	WP_014273897	25.9615	ND	0	WP_014273897	23.1818	ND	0	WP_014273897	23.4513	ND	0
	31	51	Paraccocus Denitrificans	Alfa-proteobacteria	Paracoccus denitrificans	1	4	2	2	9	ND	0	WP_104494377	29.2994	WP_011746437	25.5708	WP_104494377	32.9268	WP_011746437	30.7692	WP_011749798	29.8883	WP_011746437	41.4414	WP_011749798	43.6364	WP_011746437	27.8761	WP_104494377	36.4486
	32	42	Magnetospirllium Gryphiswaldense	Alfa-proteobacteria	Magnetospirillum gryphiswaldense	2	4	2	2	10	CDK97345	31.7536	WP_106003058	28.2967	WP_024081557	30.0429	WP_106003058	41.4085	WP_024081557	28.2609	WP_106003058	32.853	WP_024081557	29.7872	WP_106003127	35.0427	WP_024081557	37.1681	WP_024081553	52.2599
	33	43	Magnetospirllium Gryphiswaldense	Alfa-proteobacteria	Magnetospirillum gryphiswaldense	2	4	2	2	10	CDK97345	31.7536	WP_106003058	28.2967	WP_024081557	30.0429	WP_106003058	41.4085	WP_024081557	28.2609	WP_106003058	32.853	WP_024081557	29.7872	WP_106003127	35.0427	WP_024081557	37.1681	WP_024081553	52.2599
	34	44	Magnetospirllium Gryphiswaldense	Alfa-proteobacteria	Magnetospirillum gryphiswaldense	2	4	2	2	10	CDK97345	31.7536	WP_106003058	28.2967	WP_024081557	30.0429	WP_106003058	41.4085	WP_024081557	28.2609	WP_106003058	32.853	WP_024081557	29.7872	WP_106003127	35.0427	WP_024081557	37.1681	WP_024081553	52.2599
	35	45	Magnetospirllium Gryphiswaldense	Alfa-proteobacteria	Magnetospirillum gryphiswaldense	2	4	2	2	10	CDK97345	31.7536	WP_106003058	28.2967	WP_024081557	30.0429	WP_106003058	41.4085	WP_024081557	28.2609	WP_106003058	32.853	WP_024081557	29.7872	WP_106003127	35.0427	WP_024081557	37.1681	WP_024081553	52.2599
	NAB1	Nonulosonic biosynthetic pathway 1, formation of a CMP-activated sialic acid
	NAB2	Nonulosonic biosynthetic pathway 2, condensation of hexose with phosphoenolpyruvate to yield a nonulosonic acid
	KDN_BT_NAB2 Accession	Homologue for KDN NAB2 biosyhnthesis
	Ids%	% identity
	Kdn	3-Deoxy-D-glycero-D-galacto-2-nonulosonic acid
	Neu	Neuarminic acid
	Pse	Pseudaminic acid
	Leg	Legionaminc acid
	Species search	Species used for Blast search (default parameters)
	ND	0	No hit or poor homology(0-25)
	WP_007043592	35.3116	Low homology (>=25)
	WP_106003058	41.4085	Good homology (>=40%)
	4	Number of homologies >=33%, for either KDN, NEU, PSE, LEG or Total

## Sheet: 8. COMPOSITIONAL VARIATIONS
								#	Compositional variants
	C	H	N	O	P	S	Mw	Same mass	1	2	3	4	5	6	7	8	9	10	11	12	13	14	15	16	17	18	19	20	21	22	23	24	25	26	27	28	29	30	31	32	33	34	35	36	37	38	39	40	41
	17	20	2	8	0	0	380.122	1	dHydroKDN1Me
	17	24	4	6	0	0	380.17	1	Pse1Me
	17	23	3	7	0	0	381.154	2	dOxyNeu1Me	dAmidPse1Me
	17	22	2	8	0	0	382.138	1	dOxyKDN1Me			Definitions
	16	22	4	7	0	0	382.149	2	OxyPse	AmidNeu		Nominal mass (n)	Summed mass numbers - where the most abundant isotope of each element is rounded to the nearest integer value.
	16	21	3	8	0	0	383.133	2	Neu	AmidKDN		Exact mass	Summed masses of the individual isotopes of the molecule.
	16	20	2	9	0	0	384.117	2	KDN	dAmidNeu		Monoisotopic mass (mi)	Summed masses of the most abundant isotopes.
	16	24	4	7	0	0	384.164	1	HydroPse			(Mass spectrometric) mass defect	Difference between the exact mass (or monoisotopic mass) and the nearest integer mass.
	16	19	1	10	0	0	385.101	1	dAmidKDN
	16	26	4	7	0	0	386.18	1	RedPse
	18	23	5	5	0	0	389.17	1	dHydroPse1Am
	18	22	4	6	0	0	390.154	2	dHydroPse1Ac	dHydroPse1Me1Fo
	19	26	4	5	0	0	390.19	1	dHydroPse3Me
	18	25	5	5	0	0	391.186	1	dOxyPse1Am
	18	24	4	6	0	0	392.17	2	dOxyPse1Ac	dOxyPse1Me1Fo
	19	28	4	5	0	0	392.206	1	dOxyPse3Me
	17	19	3	8	0	0	393.117	1	dHydroNeu1Fo
	18	23	3	7	0	0	393.154	1	dHydroNeu2Me
	17	23	5	6	0	0	393.165	1	AmidPse1Fo
	18	27	5	5	0	0	393.201	1	AmidPse2Me
	17	18	2	9	0	0	394.101	1	dHydroKDN1Fo
	18	22	2	8	0	0	394.138	1	dHydroKDN2Me
	17	22	4	7	0	0	394.149	1	Pse1Fo
	18	26	4	6	0	0	394.185	1	Pse2Me
	17	21	3	8	0	0	395.133	2	dOxyNeu1Fo	dAmidPse1Fo
	18	25	3	7	0	0	395.169	2	dOxyNeu2Me	dAmidPse2Me
	17	20	2	9	0	0	396.117	1	dOxyKDN1Fo
	18	24	2	8	0	0	396.153	1	dOxyKDN2Me
	17	24	4	7	0	0	396.164	2	OxyPse1Me	AmidNeu1Me
	17	23	3	8	0	0	397.149	2	Neu1Me	AmidKDN1Me
	17	22	2	9	0	0	398.132	2	KDN1Me	dAmidNeu1Me
	17	26	4	7	0	0	398.18	1	HydroPse1Me
	17	21	1	10	0	0	399.116	1	dAmidKDN1Me
	16	21	3	9	0	0	399.128	1	OxyNeu
	16	20	2	10	0	0	400.112	1	OxyKDN
	17	28	4	7	0	0	400.196	1	RedPse1Me
	16	23	3	9	0	0	401.143	1	HydroNeu
	16	22	2	10	0	0	402.127	1	HydroKDN
	16	25	3	9	0	0	403.159	1	RedNeu
	19	25	5	5	0	0	403.186	1	dHydroPse1Me1Am
	16	24	2	10	0	0	404.143	1	RedKDN
	19	24	4	6	0	0	404.17	2	dHydroPse1Me1Ac	dHydroPse2Me1Fo
	18	23	5	6	0	0	405.165	1	dHydroPseGly
	19	27	5	5	0	0	405.201	1	dOxyPse1Me1Am
	18	22	4	7	0	0	406.149	2	dHydroNeu1Am	dHydroPse1Gc
	19	26	4	6	0	0	406.185	2	dOxyPse1Me1Ac	dOxyPse2Me1Fo
	18	26	6	5	0	0	406.197	1	AmidPse1Am
	18	21	3	8	0	0	407.133	3	dHydroNeu1Ac	dHydroKDN1Am	dHydroNeu1Me1Fo
	19	25	3	7	0	0	407.169	1	dHydroNeu3Me
	18	25	5	6	0	0	407.18	4	Pse1Am	AmidPse1Ac	dOxyPseGly	AmidPse1Me1Fo
	19	29	5	5	0	0	407.217	1	AmidPse3Me
	18	20	2	9	0	0	408.117	2	dHydroKDN1Ac	dHydroKDN1Me1Fo
	19	24	2	8	0	0	408.153	1	dHydroKDN3Me
	18	24	4	7	0	0	408.164	5	Pse1Ac	Pse1Me1Fo	dOxyNeu1Am	dOxyPse1Gc	dAmidPse1Am
	19	28	4	6	0	0	408.201	1	Pse3Me
	18	23	3	8	0	0	409.149	5	dOxyNeu1Ac	dOxyKDN1Am	dAmidPse1Ac	dOxyNeu1Me1Fo	dAmidPse1Me1Fo
	19	27	3	7	0	0	409.185	2	dOxyNeu3Me	dAmidPse3Me
	18	22	2	9	0	0	410.132	2	dOxyKDN1Ac	dOxyKDN1Me1Fo
	17	22	4	8	0	0	410.144	2	OxyPse1Fo	AmidNeu1Fo
	19	26	2	8	0	0	410.169	1	dOxyKDN3Me
	18	26	4	7	0	0	410.18	2	OxyPse2Me	AmidNeu2Me
	17	21	3	9	0	0	411.128	2	Neu1Fo	AmidKDN1Fo
	18	25	3	8	0	0	411.164	2	Neu2Me	AmidKDN2Me
	17	20	2	10	0	0	412.112	2	KDN1Fo	dAmidNeu1Fo
	18	24	2	9	0	0	412.148	2	KDN2Me	dAmidNeu2Me
	17	24	4	8	0	0	412.159	1	HydroPse1Fo
	18	28	4	7	0	0	412.196	1	HydroPse2Me
	17	19	1	11	0	0	413.096	1	dAmidKDN1Fo
	18	23	1	10	0	0	413.132	1	dAmidKDN2Me
	17	23	3	9	0	0	413.143	1	OxyNeu1Me
	17	22	2	10	0	0	414.127	1	OxyKDN1Me
	17	26	4	8	0	0	414.175	1	RedPse1Fo
	18	30	4	7	0	0	414.211	1	RedPse2Me
	17	25	3	9	0	0	415.159	1	HydroNeu1Me
	17	24	2	10	0	0	416.143	1	HydroKDN1Me
	19	23	5	6	0	0	417.165	1	dHydroPse1Fo1Am
	17	27	3	9	0	0	417.175	1	RedNeu1Me
	20	27	5	5	0	0	417.201	1	dHydroPse2Me1Am
	19	22	4	7	0	0	418.149	1	dHydroPse1Ac1Fo
	17	26	2	10	0	0	418.159	1	RedKDN1Me
	20	26	4	6	0	0	418.185	2	dHydroPse2Me1Ac	dHydroPse3Me1Fo
	19	25	5	6	0	0	419.18	3	dHydroPseAla	dOxyPse1Fo1Am	dHydroPse1MeGly
	20	29	5	5	0	0	419.217	1	dOxyPse2Me1Am
	19	24	4	7	0	0	420.164	4	dHydroPse1Lt	dOxyPse1Ac1Fo	dHydroNeu1Me1Am	dHydroPse1Me1Gc
	20	28	4	6	0	0	420.201	2	dOxyPse2Me1Ac	dOxyPse3Me1Fo
	19	28	6	5	0	0	420.212	1	AmidPse1Me1Am
	19	23	3	8	0	0	421.149	3	dHydroNeu1Me1Ac	dHydroNeu2Me1Fo	dHydroKDN1Me1Am
	19	27	5	6	0	0	421.196	5	Pse1Me1Am	dOxyPseAla	AmidPse1Me1Ac	AmidPse2Me1Fo	dOxyPse1MeGly
	19	22	2	9	0	0	422.132	2	dHydroKDN1Me1Ac	dHydroKDN2Me1Fo
	18	22	4	8	0	0	422.144	1	dHydroNeuGly
	19	26	4	7	0	0	422.18	6	Pse1Me1Ac	Pse2Me1Fo	dOxyPse1Lt	dOxyNeu1Me1Am	dOxyPse1Me1Gc	dAmidPse1Me1Am
	18	26	6	6	0	0	422.191	1	AmidPseGly
	18	21	3	9	0	0	423.128	2	dHydroNeu1Gc	dHydroKDNGly
	19	25	3	8	0	0	423.164	5	dOxyNeu1Me1Ac	dOxyNeu2Me1Fo	dOxyKDN1Me1Am	dAmidPse1Me1Ac	dAmidPse2Me1Fo
	18	25	5	7	0	0	423.175	4	PseGly	OxyPse1Am	AmidNeu1Am	AmidPse1Gc
	18	20	2	10	0	0	424.112	1	dHydroKDN1Gc
	19	24	2	9	0	0	424.148	2	dOxyKDN1Me1Ac	dOxyKDN2Me1Fo
	18	24	4	8	0	0	424.159	9	Neu1Am	Pse1Gc	OxyPse1Ac	AmidNeu1Ac	dOxyNeuGly	AmidKDN1Am	dAmidPseGly	OxyPse1Me1Fo	AmidNeu1Me1Fo
	19	28	4	7	0	0	424.196	2	OxyPse3Me	AmidNeu3Me
	18	23	3	9	0	0	425.143	9	Neu1Ac	KDN1Am	Neu1Me1Fo	dOxyNeu1Gc	AmidKDN1Ac	dOxyKDNGly	dAmidNeu1Am	dAmidPse1Gc	AmidKDN1Me1Fo
	19	27	3	8	0	0	425.18	2	Neu3Me	AmidKDN3Me
	18	27	5	7	0	0	425.191	1	HydroPse1Am
	18	22	2	10	0	0	426.127	6	KDN1Ac	KDN1Me1Fo	dOxyKDN1Gc	dAmidNeu1Ac	dAmidKDN1Am	dAmidNeu1Me1Fo
	19	26	2	9	0	0	426.164	2	KDN3Me	dAmidNeu3Me
	18	26	4	8	0	0	426.175	2	HydroPse1Ac	HydroPse1Me1Fo
	19	30	4	7	0	0	426.211	1	HydroPse3Me
	16	20	4	8	1	0	427.102	1	dHydroPse1PO4
	18	21	1	11	0	0	427.111	2	dAmidKDN1Ac	dAmidKDN1Me1Fo
	17	21	3	10	0	0	427.123	1	OxyNeu1Fo
	19	25	1	10	0	0	427.148	1	dAmidKDN3Me
	18	25	3	9	0	0	427.159	1	OxyNeu2Me
	18	29	5	7	0	0	427.207	1	RedPse1Am
	17	20	2	11	0	0	428.107	1	OxyKDN1Fo
	18	24	2	10	0	0	428.143	1	OxyKDN2Me
	18	28	4	8	0	0	428.191	2	RedPse1Ac	RedPse1Me1Fo
	19	32	4	7	0	0	428.227	1	RedPse3Me
	16	21	4	8	0	1	429.108	1	dHydroPse1SO4
	16	22	4	8	1	0	429.118	1	dOxyPse1PO4
	17	23	3	10	0	0	429.138	1	HydroNeu1Fo
	18	27	3	9	0	0	429.175	1	HydroNeu2Me
	17	22	2	11	0	0	430.122	1	HydroKDN1Fo
	18	26	2	10	0	0	430.159	1	HydroKDN2Me
	16	23	4	8	0	1	431.124	1	dOxyPse1SO4
	17	25	3	10	0	0	431.154	1	RedNeu1Fo
	20	25	5	6	0	0	431.18	2	dHydroPse1Ac1Am	dHydroPse1Me1Fo1Am
	18	29	3	9	0	0	431.19	1	RedNeu2Me
	21	29	5	5	0	0	431.217	1	dHydroPse3Me1Am
	17	24	2	11	0	0	432.138	1	RedKDN1Fo
	20	24	4	7	0	0	432.164	2	dHydroPse2Ac	dHydroPse1Me1Ac1Fo
	18	28	2	10	0	0	432.174	1	RedKDN2Me
	21	28	4	6	0	0	432.201	1	dHydroPse3Me1Ac
	19	23	5	7	0	0	433.16	1	dHydroPse1FoGly
	20	27	5	6	0	0	433.196	4	dOxyPse1Ac1Am	dHydroPse1MeAla	dHydroPse2MeGly	dOxyPse1Me1Fo1Am
	21	31	5	5	0	0	433.233	1	dOxyPse3Me1Am
	19	22	4	8	0	0	434.144	2	dHydroNeu1Fo1Am	dHydroPse1Fo1Gc
	20	26	4	7	0	0	434.18	6	dOxyPse2Ac	dHydroPse1Hb	dHydroNeu2Me1Am	dHydroPse1Me1Lt	dHydroPse2Me1Gc	dOxyPse1Me1Ac1Fo
	19	26	6	6	0	0	434.191	1	AmidPse1Fo1Am
	21	30	4	6	0	0	434.216	1	dOxyPse3Me1Ac
	20	30	6	5	0	0	434.228	1	AmidPse2Me1Am
	19	21	3	9	0	0	435.128	2	dHydroNeu1Ac1Fo	dHydroKDN1Fo1Am
	20	25	3	8	0	0	435.164	3	dHydroNeu2Me1Ac	dHydroNeu3Me1Fo	dHydroKDN2Me1Am
	19	25	5	7	0	0	435.175	4	Pse1Fo1Am	dHydroPseSer	AmidPse1Ac1Fo	dOxyPse1FoGly
	20	29	5	6	0	0	435.212	5	Pse2Me1Am	AmidPse2Me1Ac	AmidPse3Me1Fo	dOxyPse1MeAla	dOxyPse2MeGly
	19	20	2	10	0	0	436.112	1	dHydroKDN1Ac1Fo
	20	24	2	9	0	0	436.148	2	dHydroKDN2Me1Ac	dHydroKDN3Me1Fo
	19	24	4	8	0	0	436.159	7	Pse1Ac1Fo	dHydroNeuAla	dHydroPse1Pr	dOxyNeu1Fo1Am	dOxyPse1Fo1Gc	dAmidPse1Fo1Am	dHydroNeu1MeGly
	20	28	4	7	0	0	436.196	7	Pse2Me1Ac	Pse3Me1Fo	dOxyPse1Hb	dOxyNeu2Me1Am	dOxyPse1Me1Lt	dOxyPse2Me1Gc	dAmidPse2Me1Am
	19	28	6	6	0	0	436.207	2	AmidPseAla	AmidPse1MeGly
	19	23	3	9	0	0	437.143	7	dHydroNeu1Lt	dHydroKDNAla	dOxyNeu1Ac1Fo	dOxyKDN1Fo1Am	dAmidPse1Ac1Fo	dHydroNeu1Me1Gc	dHydroKDN1MeGly
	20	27	3	8	0	0	437.18	5	dOxyNeu2Me1Ac	dOxyNeu3Me1Fo	dOxyKDN2Me1Am	dAmidPse2Me1Ac	dAmidPse3Me1Fo
	19	27	5	7	0	0	437.191	7	PseAla	Pse1MeGly	AmidPse1Lt	dOxyPseSer	OxyPse1Me1Am	AmidNeu1Me1Am	AmidPse1Me1Gc
	19	22	2	10	0	0	438.127	3	dHydroKDN1Lt	dOxyKDN1Ac1Fo	dHydroKDN1Me1Gc
	20	26	2	9	0	0	438.164	2	dOxyKDN2Me1Ac	dOxyKDN3Me1Fo
	19	26	4	8	0	0	438.175	13	Pse1Lt	Neu1Me1Am	Pse1Me1Gc	dOxyNeuAla	dOxyPse1Pr	dAmidPseAla	OxyPse1Me1Ac	OxyPse2Me1Fo	AmidNeu1Me1Ac	AmidNeu2Me1Fo	dOxyNeu1MeGly	AmidKDN1Me1Am	dAmidPse1MeGly
	19	25	3	9	0	0	439.159	12	Neu1Me1Ac	Neu2Me1Fo	KDN1Me1Am	dOxyNeu1Lt	dOxyKDNAla	dAmidPse1Lt	dOxyNeu1Me1Gc	AmidKDN1Me1Ac	AmidKDN2Me1Fo	dOxyKDN1MeGly	dAmidNeu1Me1Am	dAmidPse1Me1Gc
	18	25	5	8	0	0	439.17	2	OxyPseGly	AmidNeuGly
	19	29	5	7	0	0	439.207	1	HydroPse1Me1Am
	19	24	2	10	0	0	440.143	7	KDN1Me1Ac	KDN2Me1Fo	dOxyKDN1Lt	dOxyKDN1Me1Gc	dAmidNeu1Me1Ac	dAmidNeu2Me1Fo	dAmidKDN1Me1Am
	18	24	4	9	0	0	440.154	5	NeuGly	OxyNeu1Am	OxyPse1Gc	AmidNeu1Gc	AmidKDNGly
	19	28	4	8	0	0	440.191	2	HydroPse1Me1Ac	HydroPse2Me1Fo
	17	22	4	8	1	0	441.118	1	dHydroPse1Me1PO4
	19	23	1	11	0	0	441.127	2	dAmidKDN1Me1Ac	dAmidKDN2Me1Fo
	18	23	3	10	0	0	441.138	7	Neu1Gc	KDNGly	OxyNeu1Ac	OxyKDN1Am	AmidKDN1Gc	dAmidNeuGly	OxyNeu1Me1Fo
	19	27	3	9	0	0	441.175	1	OxyNeu3Me
	18	27	5	8	0	0	441.186	1	HydroPseGly
	19	31	5	7	0	0	441.222	1	RedPse1Me1Am
	18	22	2	11	0	0	442.122	5	KDN1Gc	OxyKDN1Ac	dAmidNeu1Gc	dAmidKDNGly	OxyKDN1Me1Fo
	19	26	2	10	0	0	442.159	1	OxyKDN3Me
	18	26	4	9	0	0	442.17	2	HydroNeu1Am	HydroPse1Gc
	19	30	4	8	0	0	442.206	2	RedPse1Me1Ac	RedPse2Me1Fo
	18	21	1	12	0	0	443.106	1	dAmidKDN1Gc
	17	23	4	8	0	1	443.124	1	dHydroPse1Me1SO4
	17	24	4	8	1	0	443.133	1	dOxyPse1Me1PO4
	18	25	3	10	0	0	443.154	3	HydroNeu1Ac	HydroKDN1Am	HydroNeu1Me1Fo
	19	29	3	9	0	0	443.19	1	HydroNeu3Me
	18	29	5	8	0	0	443.202	1	RedPseGly
	16	19	3	10	1	0	444.081	1	dHydroNeu1PO4
	16	23	5	8	1	0	444.128	1	AmidPse1PO4
	18	24	2	11	0	0	444.138	2	HydroKDN1Ac	HydroKDN1Me1Fo
	19	28	2	10	0	0	444.174	1	HydroKDN3Me
	18	28	4	9	0	0	444.186	2	RedNeu1Am	RedPse1Gc
	16	18	2	11	1	0	445.065	1	dHydroKDN1PO4
	16	22	4	9	1	0	445.112	1	Pse1PO4
	17	25	4	8	0	1	445.139	1	dOxyPse1Me1SO4
	18	27	3	10	0	0	445.17	3	RedNeu1Ac	RedKDN1Am	RedNeu1Me1Fo
	21	27	5	6	0	0	445.196	3	dHydroPsePro	dHydroPse1Me1Ac1Am	dHydroPse2Me1Fo1Am
	19	31	3	9	0	0	445.206	1	RedNeu3Me
	16	20	3	10	0	1	446.087	1	dHydroNeu1SO4
	16	21	3	10	1	0	446.096	2	dOxyNeu1PO4	dAmidPse1PO4
	16	24	5	8	0	1	446.135	1	AmidPse1SO4
	18	26	2	11	0	0	446.154	2	RedKDN1Ac	RedKDN1Me1Fo
	21	26	4	7	0	0	446.18	2	dHydroPse1Me2Ac	dHydroPse2Me1Ac1Fo
	19	30	2	10	0	0	446.19	1	RedKDN3Me
	20	26	6	6	0	0	446.191	1	dHydroPse1AmGly
	16	19	2	11	0	1	447.071	1	dHydroKDN1SO4
	16	20	2	11	1	0	447.08	1	dOxyKDN1PO4
	16	23	4	9	0	1	447.119	1	Pse1SO4
	20	25	5	7	0	0	447.175	4	dHydroPse1Am1Gc	dHydroPse1FoAla	dHydroPse1AcGly	dHydroPse1Me1FoGly
	21	29	5	6	0	0	447.212	6	dOxyPsePro	dHydroPseVal	dHydroPse2MeAla	dHydroPse3MeGly	dOxyPse1Me1Ac1Am	dOxyPse2Me1Fo1Am
	16	22	3	10	0	1	448.103	2	dOxyNeu1SO4	dAmidPse1SO4
	20	24	4	8	0	0	448.159	5	dHydroNeu1Ac1Am	dHydroPse1Fo1Lt	dHydroPse1Ac1Gc	dHydroNeu1Me1Fo1Am	dHydroPse1Me1Fo1Gc
	21	28	4	7	0	0	448.196	6	dOxyPse1Me2Ac	dHydroNeu3Me1Am	dHydroPse1Me1Hb	dHydroPse2Me1Lt	dHydroPse3Me1Gc	dOxyPse2Me1Ac1Fo
	20	28	6	6	0	0	448.207	3	AmidPse1Ac1Am	dOxyPse1AmGly	AmidPse1Me1Fo1Am
	21	32	6	5	0	0	448.243	1	AmidPse3Me1Am
	16	21	2	11	0	1	449.087	1	dOxyKDN1SO4
	20	23	3	9	0	0	449.143	4	dHydroNeu2Ac	dHydroKDN1Ac1Am	dHydroNeu1Me1Ac1Fo	dHydroKDN1Me1Fo1Am
	21	27	3	8	0	0	449.18	2	dHydroNeu3Me1Ac	dHydroKDN3Me1Am
	20	27	5	7	0	0	449.191	10	Pse1Ac1Am	AmidPse2Ac	Pse1Me1Fo1Am	dHydroPseThr	dOxyPse1Am1Gc	dOxyPse1FoAla	dOxyPse1AcGly	dHydroPse1MeSer	AmidPse1Me1Ac1Fo	dOxyPse1Me1FoGly
	21	31	5	6	0	0	449.227	5	Pse3Me1Am	dOxyPseVal	AmidPse3Me1Ac	dOxyPse2MeAla	dOxyPse3MeGly
	20	22	2	10	0	0	450.127	2	dHydroKDN2Ac	dHydroKDN1Me1Ac1Fo
	19	22	4	9	0	0	450.139	1	dHydroNeu1FoGly
	21	26	2	9	0	0	450.164	1	dHydroKDN3Me1Ac
	20	26	4	8	0	0	450.175	12	Pse2Ac	Pse1Me1Ac1Fo	dOxyNeu1Ac1Am	dOxyPse1Fo1Lt	dOxyPse1Ac1Gc	dAmidPse1Ac1Am	dHydroNeu1MeAla	dHydroNeu2MeGly	dHydroPse1Me1Pr	dOxyNeu1Me1Fo1Am	dOxyPse1Me1Fo1Gc	dAmidPse1Me1Fo1Am
	19	26	6	7	0	0	450.186	1	AmidPse1FoGly
	21	30	4	7	0	0	450.211	6	Pse3Me1Ac	dOxyNeu3Me1Am	dOxyPse1Me1Hb	dOxyPse2Me1Lt	dOxyPse3Me1Gc	dAmidPse3Me1Am
	20	30	6	6	0	0	450.223	2	AmidPse1MeAla	AmidPse2MeGly
	19	21	3	10	0	0	451.123	2	dHydroNeu1Fo1Gc	dHydroKDN1FoGly
	19	25	5	6	0	1	451.153	1	dHydroPseCys
	20	25	3	9	0	0	451.159	11	dOxyNeu2Ac	dAmidPse2Ac	dHydroNeu1Hb	dOxyKDN1Ac1Am	dHydroNeu1Me1Lt	dHydroNeu2Me1Gc	dHydroKDN1MeAla	dHydroKDN2MeGly	dOxyNeu1Me1Ac1Fo	dOxyKDN1Me1Fo1Am	dAmidPse1Me1Ac1Fo
	19	25	5	8	0	0	451.17	4	Pse1FoGly	OxyPse1Fo1Am	AmidNeu1Fo1Am	AmidPse1Fo1Gc
	21	29	3	8	0	0	451.195	3	dOxyNeu3Me1Ac	dOxyKDN3Me1Am	dAmidPse3Me1Ac
	20	29	5	7	0	0	451.207	9	Pse1MeAla	Pse2MeGly	AmidPse1Hb	dOxyPseThr	OxyPse2Me1Am	AmidNeu2Me1Am	AmidPse1Me1Lt	AmidPse2Me1Gc	dOxyPse1MeSer
	19	20	2	11	0	0	452.107	1	dHydroKDN1Fo1Gc
	20	24	2	10	0	0	452.143	5	dOxyKDN2Ac	dHydroKDN1Hb	dHydroKDN1Me1Lt	dHydroKDN2Me1Gc	dOxyKDN1Me1Ac1Fo
	19	24	4	9	0	0	452.154	8	Neu1Fo1Am	Pse1Fo1Gc	dHydroNeuSer	OxyPse1Ac1Fo	AmidNeu1Ac1Fo	dOxyNeu1FoGly	AmidKDN1Fo1Am	dAmidPse1FoGly
	21	28	2	9	0	0	452.18	1	dOxyKDN3Me1Ac
	20	28	4	8	0	0	452.191	14	Pse1Hb	Neu2Me1Am	Pse1Me1Lt	Pse2Me1Gc	OxyPse2Me1Ac	OxyPse3Me1Fo	AmidNeu2Me1Ac	AmidNeu3Me1Fo	dOxyNeu1MeAla	dOxyNeu2MeGly	dOxyPse1Me1Pr	AmidKDN2Me1Am	dAmidPse1MeAla	dAmidPse2MeGly
	19	28	6	7	0	0	452.202	1	AmidPseSer
	19	23	3	10	0	0	453.138	9	Neu1Ac1Fo	KDN1Fo1Am	dHydroNeu1Pr	dHydroKDNSer	dOxyNeu1Fo1Gc	AmidKDN1Ac1Fo	dOxyKDN1FoGly	dAmidNeu1Fo1Am	dAmidPse1Fo1Gc
	19	27	5	6	0	1	453.168	1	dOxyPseCys
	20	27	3	9	0	0	453.175	14	Neu2Me1Ac	Neu3Me1Fo	KDN2Me1Am	dOxyNeu1Hb	dAmidPse1Hb	dOxyNeu1Me1Lt	dOxyNeu2Me1Gc	AmidKDN2Me1Ac	AmidKDN3Me1Fo	dOxyKDN1MeAla	dOxyKDN2MeGly	dAmidNeu2Me1Am	dAmidPse1Me1Lt	dAmidPse2Me1Gc
	19	27	5	8	0	0	453.186	7	PseSer	OxyPseAla	AmidNeuAla	AmidPse1Pr	OxyPse1MeGly	AmidNeu1MeGly	HydroPse1Fo1Am
	20	31	5	7	0	0	453.222	1	HydroPse2Me1Am
	19	22	2	11	0	0	454.122	5	KDN1Ac1Fo	dHydroKDN1Pr	dOxyKDN1Fo1Gc	dAmidNeu1Ac1Fo	dAmidKDN1Fo1Am
	20	26	2	10	0	0	454.159	8	KDN2Me1Ac	KDN3Me1Fo	dOxyKDN1Hb	dOxyKDN1Me1Lt	dOxyKDN2Me1Gc	dAmidNeu2Me1Ac	dAmidNeu3Me1Fo	dAmidKDN2Me1Am
	19	26	4	9	0	0	454.17	13	NeuAla	Pse1Pr	Neu1MeGly	OxyPse1Lt	AmidNeu1Lt	dOxyNeuSer	AmidKDNAla	dAmidPseSer	OxyNeu1Me1Am	OxyPse1Me1Gc	AmidNeu1Me1Gc	AmidKDN1MeGly	HydroPse1Ac1Fo
	20	30	4	8	0	0	454.206	2	HydroPse2Me1Ac	HydroPse3Me1Fo
	17	20	4	9	1	0	455.097	1	dHydroPse1Fo1PO4
	19	21	1	12	0	0	455.106	1	dAmidKDN1Ac1Fo
	18	24	4	8	1	0	455.133	1	dHydroPse2Me1PO4
	20	25	1	11	0	0	455.143	2	dAmidKDN2Me1Ac	dAmidKDN3Me1Fo
	19	25	3	10	0	0	455.154	14	Neu1Lt	KDNAla	Neu1Me1Gc	KDN1MeGly	dOxyNeu1Pr	AmidKDN1Lt	dOxyKDNSer	dAmidNeuAla	dAmidPse1Pr	OxyNeu1Me1Ac	OxyNeu2Me1Fo	OxyKDN1Me1Am	AmidKDN1Me1Gc	dAmidNeu1MeGly
	19	29	5	8	0	0	455.202	3	HydroPseAla	RedPse1Fo1Am	HydroPse1MeGly
	20	33	5	7	0	0	455.238	1	RedPse2Me1Am
	19	24	2	11	0	0	456.138	9	KDN1Lt	KDN1Me1Gc	dOxyKDN1Pr	dAmidNeu1Lt	dAmidKDNAla	OxyKDN1Me1Ac	OxyKDN2Me1Fo	dAmidNeu1Me1Gc	dAmidKDN1MeGly
	18	24	4	10	0	0	456.149	1	OxyNeuGly
	19	28	4	9	0	0	456.186	4	HydroPse1Lt	RedPse1Ac1Fo	HydroNeu1Me1Am	HydroPse1Me1Gc
	20	32	4	8	0	0	456.222	2	RedPse2Me1Ac	RedPse3Me1Fo
	17	21	4	9	0	1	457.103	1	dHydroPse1Fo1SO4
	17	22	4	9	1	0	457.112	1	dOxyPse1Fo1PO4
	19	23	1	12	0	0	457.122	2	dAmidKDN1Lt	dAmidKDN1Me1Gc
	18	23	3	11	0	0	457.133	2	OxyNeu1Gc	OxyKDNGly
	18	25	4	8	0	1	457.139	1	dHydroPse2Me1SO4
	18	26	4	8	1	0	457.149	1	dOxyPse2Me1PO4
	19	27	3	10	0	0	457.17	3	HydroNeu1Me1Ac	HydroNeu2Me1Fo	HydroKDN1Me1Am
	19	31	5	8	0	0	457.217	2	RedPseAla	RedPse1MeGly
	17	21	3	10	1	0	458.096	1	dHydroNeu1Me1PO4
	18	22	2	12	0	0	458.117	1	OxyKDN1Gc
	17	25	5	8	1	0	458.144	1	AmidPse1Me1PO4
	19	26	2	11	0	0	458.154	2	HydroKDN1Me1Ac	HydroKDN2Me1Fo
	18	26	4	10	0	0	458.165	1	HydroNeuGly
	19	30	4	9	0	0	458.201	3	RedPse1Lt	RedNeu1Me1Am	RedPse1Me1Gc
	17	20	2	11	1	0	459.08	1	dHydroKDN1Me1PO4
	17	23	4	9	0	1	459.119	1	dOxyPse1Fo1SO4
	17	24	4	9	1	0	459.128	1	Pse1Me1PO4
	18	25	3	11	0	0	459.149	2	HydroNeu1Gc	HydroKDNGly
	18	27	4	8	0	1	459.155	1	dOxyPse2Me1SO4
	21	25	5	7	0	0	459.175	1	dHydroPse1Ac1Fo1Am
	19	29	3	10	0	0	459.185	3	RedNeu1Me1Ac	RedNeu2Me1Fo	RedKDN1Me1Am
	22	29	5	6	0	0	459.212	2	dHydroPse1MePro	dHydroPse2Me1Ac1Am
	17	22	3	10	0	1	460.103	1	dHydroNeu1Me1SO4
	17	23	3	10	1	0	460.112	2	dOxyNeu1Me1PO4	dAmidPse1Me1PO4
	18	24	2	12	0	0	460.133	1	HydroKDN1Gc
	17	26	5	8	0	1	460.15	1	AmidPse1Me1SO4
	21	24	4	8	0	0	460.159	1	dHydroPse2Ac1Fo
	19	28	2	11	0	0	460.169	2	RedKDN1Me1Ac	RedKDN2Me1Fo
	18	28	4	10	0	0	460.18	1	RedNeuGly
	22	28	4	7	0	0	460.196	1	dHydroPse2Me2Ac
	21	28	6	6	0	0	460.207	2	dHydroPse1AmAla	dHydroPse1Me1AmGly
	17	21	2	11	0	1	461.087	1	dHydroKDN1Me1SO4
	17	22	2	11	1	0	461.096	1	dOxyKDN1Me1PO4
	16	22	4	10	1	0	461.107	2	OxyPse1PO4	AmidNeu1PO4
	17	25	4	9	0	1	461.134	1	Pse1Me1SO4
	18	27	3	11	0	0	461.165	2	RedNeu1Gc	RedKDNGly
	21	27	5	7	0	0	461.191	7	dHydroPse1Am1Lt	dHydroPse1AcAla	dOxyPse1Ac1Fo1Am	dHydroPse1Me1Am1Gc	dHydroPse1Me1FoAla	dHydroPse1Me1AcGly	dHydroPse2Me1FoGly
	22	31	5	6	0	0	461.227	5	dHydroPseLeu	dOxyPse1MePro	dHydroPse3MeAla	dHydroPse1MeVal	dOxyPse2Me1Ac1Am
	16	21	3	11	1	0	462.091	2	Neu1PO4	AmidKDN1PO4
	17	24	3	10	0	1	462.118	2	dOxyNeu1Me1SO4	dAmidPse1Me1SO4
	18	26	2	12	0	0	462.149	1	RedKDN1Gc
	21	26	4	8	0	0	462.175	9	dHydroNeuPro	dOxyPse2Ac1Fo	dHydroPse1Hb1Fo	dHydroPse1Ac1Lt	dHydroNeu1Me1Ac1Am	dHydroNeu2Me1Fo1Am	dHydroPse1Me1Fo1Lt	dHydroPse1Me1Ac1Gc	dHydroPse2Me1Fo1Gc
	20	26	6	7	0	0	462.186	1	dHydroPseAsn
	22	30	4	7	0	0	462.211	3	dOxyPse2Me2Ac	dHydroPse2Me1Hb	dHydroPse3Me1Lt
	21	30	6	6	0	0	462.223	5	AmidPsePro	dOxyPse1AmAla	AmidPse1Me1Ac1Am	AmidPse2Me1Fo1Am	dOxyPse1Me1AmGly
	16	20	2	12	1	0	463.075	2	KDN1PO4	dAmidNeu1PO4
	17	23	2	11	0	1	463.102	1	dOxyKDN1Me1SO4
	16	23	4	10	0	1	463.113	2	OxyPse1SO4	AmidNeu1SO4
	16	24	4	10	1	0	463.123	1	HydroPse1PO4
	21	25	3	9	0	0	463.159	5	dHydroKDNPro	dHydroNeu1Me2Ac	dHydroNeu2Me1Ac1Fo	dHydroKDN1Me1Ac1Am	dHydroKDN2Me1Fo1Am
	20	25	5	8	0	0	463.17	4	dHydroPseAsp	dHydroNeu1AmGly	dHydroPse1GcGly	dHydroPse1FoSer
	21	29	5	7	0	0	463.207	13	PsePro	Pse1Me1Ac1Am	Pse2Me1Fo1Am	AmidPse1Me2Ac	dOxyPse1Am1Lt	dOxyPse1AcAla	dHydroPse2MeSer	dHydroPse1MeThr	AmidPse2Me1Ac1Fo	dOxyPse1Me1Am1Gc	dOxyPse1Me1FoAla	dOxyPse1Me1AcGly	dOxyPse2Me1FoGly
	20	29	7	6	0	0	463.218	1	AmidPse1AmGly
	22	33	5	6	0	0	463.243	3	dOxyPseLeu	dOxyPse3MeAla	dOxyPse1MeVal
	16	19	1	13	1	0	464.059	1	dAmidKDN1PO4
	16	22	3	11	0	1	464.098	2	Neu1SO4	AmidKDN1SO4
	21	24	2	10	0	0	464.143	2	dHydroKDN1Me2Ac	dHydroKDN2Me1Ac1Fo
	20	24	4	9	0	0	464.154	6	dHydroNeu1Am1Gc	dHydroNeu1FoAla	dHydroNeu1AcGly	dHydroPse1Pr1Fo	dHydroKDN1AmGly	dHydroNeu1Me1FoGly
	21	28	4	8	0	0	464.191	17	Pse1Me2Ac	dOxyNeuPro	dAmidPsePro	dHydroNeuVal	Pse2Me1Ac1Fo	dOxyPse1Hb1Fo	dOxyPse1Ac1Lt	dHydroNeu2MeAla	dHydroNeu3MeGly	dHydroPse2Me1Pr	dOxyNeu1Me1Ac1Am	dOxyNeu2Me1Fo1Am	dOxyPse1Me1Fo1Lt	dOxyPse1Me1Ac1Gc	dOxyPse2Me1Fo1Gc	dAmidPse1Me1Ac1Am	dAmidPse2Me1Fo1Am
	20	28	6	7	0	0	464.202	6	Pse1AmGly	dOxyPseAsn	AmidPse1Am1Gc	AmidPse1FoAla	AmidPse1AcGly	AmidPse1Me1FoGly
	22	32	4	7	0	0	464.227	2	dOxyPse2Me1Hb	dOxyPse3Me1Lt
	21	32	6	6	0	0	464.238	3	AmidPseVal	AmidPse2MeAla	AmidPse3MeGly
	16	21	2	12	0	1	465.082	2	KDN1SO4	dAmidNeu1SO4
	16	25	4	10	0	1	465.129	1	HydroPse1SO4
	20	23	3	10	0	0	465.138	7	dHydroNeu1Fo1Lt	dHydroNeu1Ac1Gc	dHydroKDN1Am1Gc	dHydroKDN1FoAla	dHydroKDN1AcGly	dHydroNeu1Me1Fo1Gc	dHydroKDN1Me1FoGly
	16	26	4	10	1	0	465.139	1	RedPse1PO4
	20	27	5	6	0	1	465.168	1	dHydroPse1MeCys
	21	27	3	9	0	0	465.175	13	dOxyKDNPro	dHydroKDNVal	dOxyNeu1Me2Ac	dAmidPse1Me2Ac	dHydroNeu1Me1Hb	dHydroNeu2Me1Lt	dHydroNeu3Me1Gc	dHydroKDN2MeAla	dHydroKDN3MeGly	dOxyNeu2Me1Ac1Fo	dOxyKDN1Me1Ac1Am	dOxyKDN2Me1Fo1Am	dAmidPse2Me1Ac1Fo
	20	27	5	8	0	0	465.186	16	Pse1Am1Gc	Pse1FoAla	Pse1AcGly	dOxyPseAsp	OxyPse1Ac1Am	Pse1Me1FoGly	AmidNeu1Ac1Am	dOxyNeu1AmGly	AmidPse1Fo1Lt	AmidPse1Ac1Gc	dOxyPse1GcGly	dOxyPse1FoSer	dAmidPse1AmGly	OxyPse1Me1Fo1Am	AmidNeu1Me1Fo1Am	AmidPse1Me1Fo1Gc
	21	31	5	7	0	0	465.222	10	PseVal	Pse2MeAla	Pse3MeGly	OxyPse3Me1Am	AmidNeu3Me1Am	AmidPse1Me1Hb	AmidPse2Me1Lt	AmidPse3Me1Gc	dOxyPse2MeSer	dOxyPse1MeThr
	16	20	1	13	0	1	466.065	1	dAmidKDN1SO4
	20	22	2	11	0	0	466.122	3	dHydroKDN1Fo1Lt	dHydroKDN1Ac1Gc	dHydroKDN1Me1Fo1Gc
	21	26	2	10	0	0	466.159	5	dOxyKDN1Me2Ac	dHydroKDN1Me1Hb	dHydroKDN2Me1Lt	dHydroKDN3Me1Gc	dOxyKDN2Me1Ac1Fo
	20	26	4	9	0	0	466.17	23	Neu1Ac1Am	Pse1Fo1Lt	Pse1Ac1Gc	OxyPse2Ac	AmidNeu2Ac	Neu1Me1Fo1Am	dHydroNeuThr	Pse1Me1Fo1Gc	dOxyNeu1Am1Gc	dOxyNeu1FoAla	dOxyNeu1AcGly	dOxyPse1Pr1Fo	AmidKDN1Ac1Am	dOxyKDN1AmGly	dAmidPse1Am1Gc	dAmidPse1FoAla	dAmidPse1AcGly	dHydroNeu1MeSer	OxyPse1Me1Ac1Fo	AmidNeu1Me1Ac1Fo	dOxyNeu1Me1FoGly	AmidKDN1Me1Fo1Am	dAmidPse1Me1FoGly
	21	30	4	8	0	0	466.206	14	Neu3Me1Am	Pse1Me1Hb	Pse2Me1Lt	Pse3Me1Gc	dOxyNeuVal	dAmidPseVal	OxyPse3Me1Ac	AmidNeu3Me1Ac	dOxyNeu2MeAla	dOxyNeu3MeGly	dOxyPse2Me1Pr	AmidKDN3Me1Am	dAmidPse2MeAla	dAmidPse3MeGly
	20	30	6	7	0	0	466.218	2	AmidPseThr	AmidPse1MeSer
	16	27	4	10	0	1	467.145	1	RedPse1SO4
	20	25	3	10	0	0	467.154	21	Neu2Ac	KDN1Ac1Am	AmidKDN2Ac	Neu1Me1Ac1Fo	KDN1Me1Fo1Am	dHydroKDNThr	dOxyNeu1Fo1Lt	dOxyNeu1Ac1Gc	dOxyKDN1Am1Gc	dOxyKDN1FoAla	dOxyKDN1AcGly	dAmidNeu1Ac1Am	dAmidPse1Fo1Lt	dAmidPse1Ac1Gc	dHydroNeu1Me1Pr	dHydroKDN1MeSer	dOxyNeu1Me1Fo1Gc	AmidKDN1Me1Ac1Fo	dOxyKDN1Me1FoGly	dAmidNeu1Me1Fo1Am	dAmidPse1Me1Fo1Gc
	19	25	5	9	0	0	467.165	2	OxyPse1FoGly	AmidNeu1FoGly
	20	29	5	6	0	1	467.184	1	dOxyPse1MeCys
	21	29	3	9	0	0	467.19	13	Neu3Me1Ac	KDN3Me1Am	dOxyKDNVal	dOxyNeu1Me1Hb	dOxyNeu2Me1Lt	dOxyNeu3Me1Gc	AmidKDN3Me1Ac	dOxyKDN2MeAla	dOxyKDN3MeGly	dAmidNeu3Me1Am	dAmidPse1Me1Hb	dAmidPse2Me1Lt	dAmidPse3Me1Gc
	20	29	5	8	0	0	467.202	9	PseThr	Pse1MeSer	OxyPse1MeAla	OxyPse2MeGly	AmidNeu1MeAla	AmidNeu2MeGly	AmidPse1Me1Pr	HydroPse1Ac1Am	HydroPse1Me1Fo1Am
	21	33	5	7	0	0	467.238	1	HydroPse3Me1Am
	18	23	5	8	1	0	468.128	1	dHydroPse1Am1PO4
	19	24	4	8	0	1	468.132	1	dHydroNeuCys
	20	24	2	11	0	0	468.138	10	KDN2Ac	dAmidNeu2Ac	KDN1Me1Ac1Fo	dOxyKDN1Fo1Lt	dOxyKDN1Ac1Gc	dAmidKDN1Ac1Am	dHydroKDN1Me1Pr	dOxyKDN1Me1Fo1Gc	dAmidNeu1Me1Ac1Fo	dAmidKDN1Me1Fo1Am
	19	24	4	10	0	0	468.149	5	Neu1FoGly	OxyNeu1Fo1Am	OxyPse1Fo1Gc	AmidNeu1Fo1Gc	AmidKDN1FoGly
	21	28	2	10	0	0	468.174	6	KDN3Me1Ac	dOxyKDN1Me1Hb	dOxyKDN2Me1Lt	dOxyKDN3Me1Gc	dAmidNeu3Me1Ac	dAmidKDN3Me1Am
	19	28	6	6	0	1	468.179	1	AmidPseCys
	20	28	4	9	0	0	468.186	18	Neu1MeAla	Neu2MeGly	Pse1Me1Pr	OxyPse1Hb	AmidNeu1Hb	dOxyNeuThr	HydroPse2Ac	dAmidPseThr	OxyNeu2Me1Am	OxyPse1Me1Lt	OxyPse2Me1Gc	AmidNeu1Me1Lt	AmidNeu2Me1Gc	dOxyNeu1MeSer	AmidKDN1MeAla	AmidKDN2MeGly	dAmidPse1MeSer	HydroPse1Me1Ac1Fo
	21	32	4	8	0	0	468.222	1	HydroPse3Me1Ac
	18	22	4	9	1	0	469.112	2	dHydroPse1Ac1PO4	dHydroPse1Me1Fo1PO4
	19	23	3	9	0	1	469.115	1	dHydroKDNCys
	20	23	1	12	0	0	469.122	2	dAmidKDN2Ac	dAmidKDN1Me1Ac1Fo
	19	23	3	11	0	0	469.133	6	Neu1Fo1Gc	KDN1FoGly	OxyNeu1Ac1Fo	OxyKDN1Fo1Am	AmidKDN1Fo1Gc	dAmidNeu1FoGly
	19	26	4	8	1	0	469.149	1	dHydroPse3Me1PO4
	21	27	1	11	0	0	469.158	1	dAmidKDN3Me1Ac
	19	27	5	7	0	1	469.163	1	PseCys
	20	27	3	10	0	0	469.17	17	Neu1Hb	Neu1Me1Lt	Neu2Me1Gc	KDN1MeAla	KDN2MeGly	AmidKDN1Hb	dOxyKDNThr	OxyNeu2Me1Ac	OxyNeu3Me1Fo	OxyKDN2Me1Am	dOxyNeu1Me1Pr	AmidKDN1Me1Lt	AmidKDN2Me1Gc	dOxyKDN1MeSer	dAmidNeu1MeAla	dAmidNeu2MeGly	dAmidPse1Me1Pr
	19	27	5	9	0	0	469.181	3	OxyPseSer	AmidNeuSer	HydroPse1FoGly
	20	31	5	8	0	0	469.217	4	RedPse1Ac1Am	HydroPse1MeAla	HydroPse2MeGly	RedPse1Me1Fo1Am
	21	35	5	7	0	0	469.254	1	RedPse3Me1Am
	19	22	2	12	0	0	470.117	4	KDN1Fo1Gc	OxyKDN1Ac1Fo	dAmidNeu1Fo1Gc	dAmidKDN1FoGly
	18	24	5	8	0	1	470.135	1	dHydroPse1Am1SO4
	18	25	5	8	1	0	470.144	1	dOxyPse1Am1PO4
	19	26	4	8	0	1	470.147	2	dOxyNeuCys	dAmidPseCys
	20	26	2	11	0	0	470.154	11	KDN1Hb	KDN1Me1Lt	KDN2Me1Gc	dAmidNeu1Hb	OxyKDN2Me1Ac	OxyKDN3Me1Fo	dOxyKDN1Me1Pr	dAmidNeu1Me1Lt	dAmidNeu2Me1Gc	dAmidKDN1MeAla	dAmidKDN2MeGly
	19	26	4	10	0	0	470.165	8	NeuSer	OxyNeuAla	OxyPse1Pr	AmidNeu1Pr	AmidKDNSer	OxyNeu1MeGly	HydroNeu1Fo1Am	HydroPse1Fo1Gc
	20	30	4	9	0	0	470.201	6	RedPse2Ac	HydroPse1Hb	HydroNeu2Me1Am	HydroPse1Me1Lt	HydroPse2Me1Gc	RedPse1Me1Ac1Fo
	21	34	4	8	0	0	470.238	1	RedPse3Me1Ac
	19	21	1	13	0	0	471.101	1	dAmidKDN1Fo1Gc
	18	23	4	9	0	1	471.119	2	dHydroPse1Ac1SO4	dHydroPse1Me1Fo1SO4
	18	24	4	9	1	0	471.128	2	dOxyPse1Ac1PO4	dOxyPse1Me1Fo1PO4
	19	25	3	9	0	1	471.131	1	dOxyKDNCys
	20	25	1	12	0	0	471.138	3	dAmidKDN1Hb	dAmidKDN1Me1Lt	dAmidKDN2Me1Gc
	19	25	3	11	0	0	471.149	10	Neu1Pr	KDNSer	OxyNeu1Lt	OxyKDNAla	AmidKDN1Pr	dAmidNeuSer	OxyNeu1Me1Gc	OxyKDN1MeGly	HydroNeu1Ac1Fo	HydroKDN1Fo1Am
	19	27	4	8	0	1	471.155	1	dHydroPse3Me1SO4
	19	28	4	8	1	0	471.164	1	dOxyPse3Me1PO4
	20	29	3	10	0	0	471.185	3	HydroNeu2Me1Ac	HydroNeu3Me1Fo	HydroKDN2Me1Am
	19	29	5	9	0	0	471.197	2	HydroPseSer	RedPse1FoGly
	20	33	5	8	0	0	471.233	2	RedPse1MeAla	RedPse2MeGly
	17	19	3	11	1	0	472.076	1	dHydroNeu1Fo1PO4
	18	23	3	10	1	0	472.112	1	dHydroNeu2Me1PO4
	17	23	5	9	1	0	472.123	1	AmidPse1Fo1PO4
	19	24	2	12	0	0	472.133	6	KDN1Pr	OxyKDN1Lt	dAmidNeu1Pr	dAmidKDNSer	OxyKDN1Me1Gc	HydroKDN1Ac1Fo
	18	26	5	8	0	1	472.15	1	dOxyPse1Am1SO4
	18	27	5	8	1	0	472.16	1	AmidPse2Me1PO4
	20	28	2	11	0	0	472.169	2	HydroKDN2Me1Ac	HydroKDN3Me1Fo
	19	28	4	10	0	0	472.18	5	HydroNeuAla	HydroPse1Pr	RedNeu1Fo1Am	RedPse1Fo1Gc	HydroNeu1MeGly
	20	32	4	9	0	0	472.217	4	RedPse1Hb	RedNeu2Me1Am	RedPse1Me1Lt	RedPse2Me1Gc
	17	18	2	12	1	0	473.06	1	dHydroKDN1Fo1PO4
	18	22	2	11	1	0	473.096	1	dHydroKDN2Me1PO4
	17	22	4	10	1	0	473.107	1	Pse1Fo1PO4
	19	23	1	13	0	0	473.117	1	dAmidKDN1Pr
	18	25	4	9	0	1	473.134	2	dOxyPse1Ac1SO4	dOxyPse1Me1Fo1SO4
	18	26	4	9	1	0	473.144	1	Pse2Me1PO4
	19	27	3	11	0	0	473.165	6	HydroNeu1Lt	HydroKDNAla	RedNeu1Ac1Fo	RedKDN1Fo1Am	HydroNeu1Me1Gc	HydroKDN1MeGly
	19	29	4	8	0	1	473.171	1	dOxyPse3Me1SO4
	22	27	5	7	0	0	473.191	3	dHydroPse2Ac1Am	dHydroPse1FoPro	dHydroPse1Me1Ac1Fo1Am
	20	31	3	10	0	0	473.201	3	RedNeu2Me1Ac	RedNeu3Me1Fo	RedKDN2Me1Am
	19	31	5	9	0	0	473.212	1	RedPseSer
	23	31	5	6	0	0	473.227	1	dHydroPse2MePro
	17	20	3	11	0	1	474.082	1	dHydroNeu1Fo1SO4
	17	21	3	11	1	0	474.091	2	dOxyNeu1Fo1PO4	dAmidPse1Fo1PO4
	18	24	3	10	0	1	474.118	1	dHydroNeu2Me1SO4
	18	25	3	10	1	0	474.128	2	dOxyNeu2Me1PO4	dAmidPse2Me1PO4
	17	24	5	9	0	1	474.13	1	AmidPse1Fo1SO4
	19	26	2	12	0	0	474.149	3	HydroKDN1Lt	RedKDN1Ac1Fo	HydroKDN1Me1Gc
	18	28	5	8	0	1	474.166	1	AmidPse2Me1SO4
	22	26	4	8	0	0	474.175	2	dHydroPse3Ac	dHydroPse1Me2Ac1Fo
	20	30	2	11	0	0	474.185	2	RedKDN2Me1Ac	RedKDN3Me1Fo
	21	26	6	7	0	0	474.186	1	dHydroPse1Fo1AmGly
	19	30	4	10	0	0	474.196	3	RedNeuAla	RedPse1Pr	RedNeu1MeGly
	22	30	6	6	0	0	474.223	2	dHydroPse1Me1AmAla	dHydroPse2Me1AmGly
	17	19	2	12	0	1	475.066	1	dHydroKDN1Fo1SO4
	17	20	2	12	1	0	475.075	1	dOxyKDN1Fo1PO4
	18	23	2	11	0	1	475.102	1	dHydroKDN2Me1SO4
	18	24	2	11	1	0	475.112	1	dOxyKDN2Me1PO4
	17	23	4	10	0	1	475.113	1	Pse1Fo1SO4
	17	24	4	10	1	0	475.123	2	OxyPse1Me1PO4	AmidNeu1Me1PO4
	18	27	4	9	0	1	475.15	1	Pse2Me1SO4
	21	25	5	8	0	0	475.17	2	dHydroPse1Fo1Am1Gc	dHydroPse1Ac1FoGly
	19	29	3	11	0	0	475.18	4	RedNeu1Lt	RedKDNAla	RedNeu1Me1Gc	RedKDN1MeGly
	22	29	5	7	0	0	475.207	11	dOxyPse2Ac1Am	dOxyPse1FoPro	dHydroPse1Hb1Am	dHydroPse1FoVal	dHydroPse1Me1Am1Lt	dHydroPse2Me1Am1Gc	dHydroPse1Me1AcAla	dHydroPse2Me1FoAla	dHydroPse2Me1AcGly	dHydroPse3Me1FoGly	dOxyPse1Me1Ac1Fo1Am
	23	33	5	6	0	0	475.243	3	dOxyPse2MePro	dHydroPse1MeLeu	dHydroPse2MeVal
	17	22	3	11	0	1	476.098	2	dOxyNeu1Fo1SO4	dAmidPse1Fo1SO4
	17	23	3	11	1	0	476.107	2	Neu1Me1PO4	AmidKDN1Me1PO4
	18	26	3	10	0	1	476.134	2	dOxyNeu2Me1SO4	dAmidPse2Me1SO4
	21	24	4	9	0	0	476.154	2	dHydroNeu1Ac1Fo1Am	dHydroPse1Ac1Fo1Gc
	19	28	2	12	0	0	476.164	2	RedKDN1Lt	RedKDN1Me1Gc
	22	28	4	8	0	0	476.191	9	dOxyPse3Ac	dHydroNeu1MePro	dHydroPse1Ac1Hb	dOxyPse1Me2Ac1Fo	dHydroNeu2Me1Ac1Am	dHydroPse1Me1Hb1Fo	dHydroPse1Me1Ac1Lt	dHydroPse2Me1Fo1Lt	dHydroPse2Me1Ac1Gc
	21	28	6	7	0	0	476.202	5	dHydroPseGln	dHydroPse1MeAsn	dHydroPse1AmSer	AmidPse1Ac1Fo1Am	dOxyPse1Fo1AmGly
	23	32	4	7	0	0	476.227	1	dHydroPse3Me1Hb
	22	32	6	6	0	0	476.238	5	dHydroPseLys	AmidPse1MePro	AmidPse2Me1Ac1Am	dOxyPse1Me1AmAla	dOxyPse2Me1AmGly
	17	21	2	12	0	1	477.082	1	dOxyKDN1Fo1SO4
	17	22	2	12	1	0	477.091	2	KDN1Me1PO4	dAmidNeu1Me1PO4
	18	25	2	11	0	1	477.118	1	dOxyKDN2Me1SO4
	17	25	4	10	0	1	477.129	2	OxyPse1Me1SO4	AmidNeu1Me1SO4
	21	23	3	10	0	0	477.138	2	dHydroNeu2Ac1Fo	dHydroKDN1Ac1Fo1Am
	17	26	4	10	1	0	477.139	1	HydroPse1Me1PO4
	22	27	3	9	0	0	477.175	3	dHydroNeu2Me2Ac	dHydroKDN1MePro	dHydroKDN2Me1Ac1Am
	21	27	5	8	0	0	477.186	15	Pse1Ac1Fo1Am	dHydroPseGlu	AmidPse2Ac1Fo	dHydroNeu1AmAla	dHydroPse1Pr1Am	dHydroPse1GcAla	dHydroPse1MeAsp	dHydroPse1LtGly	dHydroPse1AcSer	dHydroPse1FoThr	dOxyPse1Fo1Am1Gc	dOxyPse1Ac1FoGly	dHydroNeu1Me1AmGly	dHydroPse1Me1GcGly	dHydroPse1Me1FoSer
	22	31	5	7	0	0	477.222	13	Pse1MePro	Pse2Me1Ac1Am	AmidPse2Me2Ac	dOxyPse1Hb1Am	dOxyPse1FoVal	dHydroPse3MeSer	dHydroPse2MeThr	dOxyPse1Me1Am1Lt	dOxyPse2Me1Am1Gc	dOxyPse1Me1AcAla	dOxyPse2Me1FoAla	dOxyPse2Me1AcGly	dOxyPse3Me1FoGly
	21	31	7	6	0	0	477.234	2	AmidPse1AmAla	AmidPse1Me1AmGly
	23	35	5	6	0	0	477.259	2	dOxyPse1MeLeu	dOxyPse2MeVal
	17	21	1	13	1	0	478.075	1	dAmidKDN1Me1PO4
	16	21	3	12	1	0	478.086	1	OxyNeu1PO4
	17	24	3	11	0	1	478.113	2	Neu1Me1SO4	AmidKDN1Me1SO4
	21	22	2	11	0	0	478.122	1	dHydroKDN2Ac1Fo
	22	26	2	10	0	0	478.159	1	dHydroKDN2Me2Ac
	21	26	4	9	0	0	478.17	15	Pse2Ac1Fo	dHydroNeu1Am1Lt	dHydroNeu1AcAla	dHydroPse1Gc1Lt	dHydroPse1Ac1Pr	dHydroKDN1AmAla	dOxyNeu1Ac1Fo1Am	dOxyPse1Ac1Fo1Gc	dAmidPse1Ac1Fo1Am	dHydroNeu1Me1Am1Gc	dHydroNeu1Me1FoAla	dHydroNeu1Me1AcGly	dHydroNeu2Me1FoGly	dHydroPse1Me1Pr1Fo	dHydroKDN1Me1AmGly
	22	30	4	8	0	0	478.206	14	Pse2Me2Ac	dHydroNeuLeu	dOxyNeu1MePro	dOxyPse1Ac1Hb	dAmidPse1MePro	dHydroNeu3MeAla	dHydroNeu1MeVal	dHydroPse3Me1Pr	dOxyNeu2Me1Ac1Am	dOxyPse1Me1Hb1Fo	dOxyPse1Me1Ac1Lt	dOxyPse2Me1Fo1Lt	dOxyPse2Me1Ac1Gc	dAmidPse2Me1Ac1Am
	21	30	6	7	0	0	478.218	11	Pse1AmAla	dOxyPseGln	Pse1Me1AmGly	AmidPse1Am1Lt	AmidPse1AcAla	dOxyPse1MeAsn	dOxyPse1AmSer	AmidPse1Me1Am1Gc	AmidPse1Me1FoAla	AmidPse1Me1AcGly	AmidPse2Me1FoGly
	23	34	4	7	0	0	478.243	1	dOxyPse3Me1Hb
	22	34	6	6	0	0	478.254	4	AmidPseLeu	dOxyPseLys	AmidPse3MeAla	AmidPse1MeVal
	16	20	2	13	1	0	479.07	1	OxyKDN1PO4
	17	23	2	12	0	1	479.097	2	KDN1Me1SO4	dAmidNeu1Me1SO4
	17	27	4	10	0	1	479.145	1	HydroPse1Me1SO4
	20	25	5	7	0	1	479.147	1	dHydroPse1FoCys
	21	25	3	10	0	0	479.154	14	dOxyNeu2Ac1Fo	dAmidPse2Ac1Fo	dHydroNeu1Hb1Fo	dHydroNeu1Ac1Lt	dHydroKDN1Am1Lt	dHydroKDN1AcAla	dOxyKDN1Ac1Fo1Am	dHydroNeu1Me1Fo1Lt	dHydroNeu1Me1Ac1Gc	dHydroNeu2Me1Fo1Gc	dHydroKDN1Me1Am1Gc	dHydroKDN1Me1FoAla	dHydroKDN1Me1AcGly	dHydroKDN2Me1FoGly
	17	28	4	10	1	0	479.154	1	RedPse1Me1PO4
	20	25	5	9	0	0	479.165	1	dHydroNeuAsn
	21	29	5	6	0	1	479.184	2	dHydroPseMet	dHydroPse2MeCys
	22	29	3	9	0	0	479.19	9	dHydroKDNLeu	dOxyNeu2Me2Ac	dOxyKDN1MePro	dAmidPse2Me2Ac	dHydroNeu2Me1Hb	dHydroNeu3Me1Lt	dHydroKDN3MeAla	dHydroKDN1MeVal	dOxyKDN2Me1Ac1Am
	21	29	5	8	0	0	479.202	30	Pse1Am1Lt	Pse1AcAla	OxyPsePro	AmidNeuPro	dOxyPseGlu	Pse1Me1Am1Gc	Pse1Me1FoAla	Pse1Me1AcGly	Pse2Me1FoGly	dOxyNeu1AmAla	AmidPse1Hb1Fo	AmidPse1Ac1Lt	dOxyPse1Pr1Am	dOxyPse1GcAla	dOxyPse1MeAsp	dOxyPse1LtGly	dOxyPse1AcSer	dOxyPse1FoThr	dAmidPse1AmAla	OxyPse1Me1Ac1Am	OxyPse2Me1Fo1Am	AmidNeu1Me1Ac1Am	AmidNeu2Me1Fo1Am	dOxyNeu1Me1AmGly	AmidPse1Me1Fo1Lt	AmidPse1Me1Ac1Gc	AmidPse2Me1Fo1Gc	dOxyPse1Me1GcGly	dOxyPse1Me1FoSer	dAmidPse1Me1AmGly
	20	29	7	7	0	0	479.213	1	AmidPseAsn
	22	33	5	7	0	0	479.238	7	PseLeu	Pse3MeAla	Pse1MeVal	AmidPse2Me1Hb	AmidPse3Me1Lt	dOxyPse3MeSer	dOxyPse2MeThr
	17	22	1	13	0	1	480.081	1	dAmidKDN1Me1SO4
	16	22	3	12	0	1	480.092	1	OxyNeu1SO4
	16	23	3	12	1	0	480.102	1	HydroNeu1PO4
	21	24	2	11	0	0	480.138	6	dOxyKDN2Ac1Fo	dHydroKDN1Hb1Fo	dHydroKDN1Ac1Lt	dHydroKDN1Me1Fo1Lt	dHydroKDN1Me1Ac1Gc	dHydroKDN2Me1Fo1Gc
	20	24	4	10	0	0	480.149	4	dHydroNeuAsp	dHydroKDNAsn	dHydroNeu1GcGly	dHydroNeu1FoSer
	22	28	2	10	0	0	480.174	3	dOxyKDN2Me2Ac	dHydroKDN2Me1Hb	dHydroKDN3Me1Lt
	21	28	4	9	0	0	480.186	35	NeuPro	Pse1Hb1Fo	Pse1Ac1Lt	AmidKDNPro	Neu1Me1Ac1Am	Neu2Me1Fo1Am	Pse1Me1Fo1Lt	Pse1Me1Ac1Gc	Pse2Me1Fo1Gc	OxyPse1Me2Ac	dHydroPseXyl	AmidNeu1Me2Ac	dOxyNeu1Am1Lt	dOxyNeu1AcAla	dOxyPse1Gc1Lt	dOxyPse1Ac1Pr	dOxyKDN1AmAla	dAmidPse1Am1Lt	dAmidPse1AcAla	dHydroNeu2MeSer	dHydroNeu1MeThr	OxyPse2Me1Ac1Fo	AmidNeu2Me1Ac1Fo	dOxyNeu1Me1Am1Gc	dOxyNeu1Me1FoAla	dOxyNeu1Me1AcGly	dOxyNeu2Me1FoGly	dOxyPse1Me1Pr1Fo	AmidKDN1Me1Ac1Am	AmidKDN2Me1Fo1Am	dOxyKDN1Me1AmGly	dAmidPse1Me1Am1Gc	dAmidPse1Me1FoAla	dAmidPse1Me1AcGly	dAmidPse2Me1FoGly
	20	28	6	8	0	0	480.197	6	PseAsn	AmidPseAsp	OxyPse1AmGly	AmidNeu1AmGly	AmidPse1GcGly	AmidPse1FoSer
	22	32	4	8	0	0	480.222	9	Pse2Me1Hb	Pse3Me1Lt	dOxyNeuLeu	dAmidPseLeu	dOxyNeu3MeAla	dOxyNeu1MeVal	dOxyPse3Me1Pr	dAmidPse3MeAla	dAmidPse1MeVal
	21	32	6	7	0	0	480.233	2	AmidPse2MeSer	AmidPse1MeThr
	16	21	2	13	0	1	481.076	1	OxyKDN1SO4
	16	22	2	13	1	0	481.086	1	HydroKDN1PO4
	20	23	3	11	0	0	481.133	4	dHydroKDNAsp	dHydroNeu1Pr1Fo	dHydroKDN1GcGly	dHydroKDN1FoSer
	17	29	4	10	0	1	481.16	1	RedPse1Me1SO4
	20	27	5	7	0	1	481.163	1	dOxyPse1FoCys
	21	27	3	10	0	0	481.17	29	KDNPro	Neu1Me2Ac	dAmidNeuPro	Neu2Me1Ac1Fo	KDN1Me1Ac1Am	KDN2Me1Fo1Am	dOxyNeu1Hb1Fo	dOxyNeu1Ac1Lt	AmidKDN1Me2Ac	dOxyKDN1Am1Lt	dOxyKDN1AcAla	dAmidPse1Hb1Fo	dAmidPse1Ac1Lt	dHydroNeu2Me1Pr	dHydroKDN2MeSer	dHydroKDN1MeThr	dOxyNeu1Me1Fo1Lt	dOxyNeu1Me1Ac1Gc	dOxyNeu2Me1Fo1Gc	AmidKDN2Me1Ac1Fo	dOxyKDN1Me1Am1Gc	dOxyKDN1Me1FoAla	dOxyKDN1Me1AcGly	dOxyKDN2Me1FoGly	dAmidNeu1Me1Ac1Am	dAmidNeu2Me1Fo1Am	dAmidPse1Me1Fo1Lt	dAmidPse1Me1Ac1Gc	dAmidPse2Me1Fo1Gc
	20	27	5	9	0	0	481.181	16	PseAsp	Neu1AmGly	Pse1GcGly	Pse1FoSer	dOxyNeuAsn	dAmidPseAsn	OxyPse1Am1Gc	OxyPse1FoAla	OxyPse1AcGly	AmidNeu1Am1Gc	AmidNeu1FoAla	AmidNeu1AcGly	AmidPse1Pr1Fo	AmidKDN1AmGly	OxyPse1Me1FoGly	AmidNeu1Me1FoGly
	21	31	5	6	0	1	481.2	2	dOxyPseMet	dOxyPse2MeCys
	22	31	3	9	0	0	481.206	7	dOxyKDNLeu	dOxyNeu2Me1Hb	dOxyNeu3Me1Lt	dOxyKDN3MeAla	dOxyKDN1MeVal	dAmidPse2Me1Hb	dAmidPse3Me1Lt
	21	31	5	8	0	0	481.217	12	Pse2MeSer	Pse1MeThr	OxyPseVal	AmidNeuVal	HydroPsePro	OxyPse2MeAla	OxyPse3MeGly	AmidNeu2MeAla	AmidNeu3MeGly	AmidPse2Me1Pr	HydroPse1Me1Ac1Am	HydroPse2Me1Fo1Am
	16	24	3	12	0	1	482.108	1	HydroNeu1SO4
	20	22	2	12	0	0	482.117	1	dHydroKDN1Pr1Fo
	16	25	3	12	1	0	482.118	1	RedNeu1PO4
	19	25	5	8	1	0	482.144	1	dHydroPse1Me1Am1PO4
	20	26	4	8	0	1	482.147	1	dHydroNeu1MeCys
	21	26	2	11	0	0	482.154	13	KDN1Me2Ac	dAmidKDNPro	KDN2Me1Ac1Fo	dOxyKDN1Hb1Fo	dOxyKDN1Ac1Lt	dAmidNeu1Me2Ac	dHydroKDN2Me1Pr	dOxyKDN1Me1Fo1Lt	dOxyKDN1Me1Ac1Gc	dOxyKDN2Me1Fo1Gc	dAmidNeu2Me1Ac1Fo	dAmidKDN1Me1Ac1Am	dAmidKDN2Me1Fo1Am
	20	26	4	10	0	0	482.165	26	Neu1Am1Gc	Neu1FoAla	Neu1AcGly	Pse1Pr1Fo	KDN1AmGly	dOxyNeuAsp	dOxyKDNAsn	dAmidPseAsp	OxyNeu1Ac1Am	Neu1Me1FoGly	OxyPse1Fo1Lt	OxyPse1Ac1Gc	AmidNeu1Fo1Lt	AmidNeu1Ac1Gc	dOxyNeu1GcGly	dOxyNeu1FoSer	AmidKDN1Am1Gc	AmidKDN1FoAla	AmidKDN1AcGly	dAmidNeu1AmGly	dAmidPse1GcGly	dAmidPse1FoSer	OxyNeu1Me1Fo1Am	OxyPse1Me1Fo1Gc	AmidNeu1Me1Fo1Gc	AmidKDN1Me1FoGly
	22	30	2	10	0	0	482.19	2	dOxyKDN2Me1Hb	dOxyKDN3Me1Lt
	20	30	6	6	0	1	482.195	1	AmidPse1MeCys
	21	30	4	9	0	0	482.201	21	NeuVal	Neu2MeAla	Neu3MeGly	Pse2Me1Pr	dOxyPseXyl	AmidKDNVal	OxyNeu3Me1Am	OxyPse1Me1Hb	OxyPse2Me1Lt	OxyPse3Me1Gc	AmidNeu1Me1Hb	AmidNeu2Me1Lt	AmidNeu3Me1Gc	dOxyNeu2MeSer	dOxyNeu1MeThr	AmidKDN2MeAla	AmidKDN3MeGly	HydroPse1Me2Ac	dAmidPse2MeSer	dAmidPse1MeThr	HydroPse2Me1Ac1Fo
	20	30	6	8	0	0	482.212	1	HydroPse1AmGly
	16	23	2	13	0	1	483.092	1	HydroKDN1SO4
	16	24	2	13	1	0	483.102	1	RedKDN1PO4
	19	24	4	9	1	0	483.128	2	dHydroPse1Me1Ac1PO4	dHydroPse2Me1Fo1PO4
	20	25	3	9	0	1	483.131	1	dHydroKDN1MeCys
	21	25	1	12	0	0	483.138	2	dAmidKDN1Me2Ac	dAmidKDN2Me1Ac1Fo
	20	25	3	11	0	0	483.149	24	Neu1Fo1Lt	Neu1Ac1Gc	OxyNeu2Ac	KDN1Am1Gc	KDN1FoAla	KDN1AcGly	dOxyKDNAsp	Neu1Me1Fo1Gc	OxyKDN1Ac1Am	KDN1Me1FoGly	dOxyNeu1Pr1Fo	AmidKDN1Fo1Lt	AmidKDN1Ac1Gc	dOxyKDN1GcGly	dOxyKDN1FoSer	dAmidNeu1Am1Gc	dAmidNeu1FoAla	dAmidNeu1AcGly	dAmidPse1Pr1Fo	dAmidKDN1AmGly	OxyNeu1Me1Ac1Fo	OxyKDN1Me1Fo1Am	AmidKDN1Me1Fo1Gc	dAmidNeu1Me1FoGly
	20	29	5	7	0	1	483.179	1	Pse1MeCys
	21	29	3	10	0	0	483.185	18	KDNVal	Neu1Me1Hb	Neu2Me1Lt	Neu3Me1Gc	KDN2MeAla	KDN3MeGly	dAmidNeuVal	OxyNeu3Me1Ac	OxyKDN3Me1Am	dOxyNeu2Me1Pr	AmidKDN1Me1Hb	AmidKDN2Me1Lt	AmidKDN3Me1Gc	dOxyKDN2MeSer	dOxyKDN1MeThr	dAmidNeu2MeAla	dAmidNeu3MeGly	dAmidPse2Me1Pr
	20	29	5	9	0	0	483.197	8	OxyPseThr	AmidNeuThr	OxyPse1MeSer	AmidNeu1MeSer	HydroPse1Am1Gc	HydroPse1FoAla	HydroPse1AcGly	HydroPse1Me1FoGly
	21	33	5	8	0	0	483.233	6	RedPsePro	HydroPseVal	HydroPse2MeAla	HydroPse3MeGly	RedPse1Me1Ac1Am	RedPse2Me1Fo1Am
	18	23	5	9	1	0	484.123	1	dHydroPse1PO4Gly
	16	26	3	12	0	1	484.124	1	RedNeu1SO4
	20	24	2	12	0	0	484.133	13	KDN1Fo1Lt	KDN1Ac1Gc	OxyKDN2Ac	KDN1Me1Fo1Gc	dOxyKDN1Pr1Fo	dAmidNeu1Fo1Lt	dAmidNeu1Ac1Gc	dAmidKDN1Am1Gc	dAmidKDN1FoAla	dAmidKDN1AcGly	OxyKDN1Me1Ac1Fo	dAmidNeu1Me1Fo1Gc	dAmidKDN1Me1FoGly
	19	24	4	11	0	0	484.144	1	OxyNeu1FoGly
	19	26	5	8	0	1	484.15	1	dHydroPse1Me1Am1SO4
	19	27	5	8	1	0	484.16	1	dOxyPse1Me1Am1PO4
	20	28	4	8	0	1	484.163	2	dOxyNeu1MeCys	dAmidPse1MeCys
	21	28	2	11	0	0	484.169	11	KDN1Me1Hb	KDN2Me1Lt	KDN3Me1Gc	dAmidKDNVal	OxyKDN3Me1Ac	dOxyKDN2Me1Pr	dAmidNeu1Me1Hb	dAmidNeu2Me1Lt	dAmidNeu3Me1Gc	dAmidKDN2MeAla	dAmidKDN3MeGly
	20	28	4	10	0	0	484.18	13	NeuThr	Neu1MeSer	AmidKDNThr	OxyNeu1MeAla	OxyNeu2MeGly	OxyPse1Me1Pr	AmidNeu1Me1Pr	AmidKDN1MeSer	HydroNeu1Ac1Am	HydroPse1Fo1Lt	HydroPse1Ac1Gc	HydroNeu1Me1Fo1Am	HydroPse1Me1Fo1Gc
	21	32	4	9	0	0	484.217	6	RedPse1Me2Ac	HydroNeu3Me1Am	HydroPse1Me1Hb	HydroPse2Me1Lt	HydroPse3Me1Gc	RedPse2Me1Ac1Fo
	20	32	6	8	0	0	484.228	1	RedPse1AmGly
	18	22	4	10	1	0	485.107	2	dHydroNeu1Am1PO4	dHydroPse1Gc1PO4
	16	25	2	13	0	1	485.108	1	RedKDN1SO4
	20	23	1	13	0	0	485.117	3	dAmidKDN1Fo1Lt	dAmidKDN1Ac1Gc	dAmidKDN1Me1Fo1Gc
	19	23	3	12	0	0	485.128	2	OxyNeu1Fo1Gc	OxyKDN1FoGly
	19	25	4	9	0	1	485.134	2	dHydroPse1Me1Ac1SO4	dHydroPse2Me1Fo1SO4
	19	26	4	9	1	0	485.144	2	dOxyPse1Me1Ac1PO4	dOxyPse2Me1Fo1PO4
	20	27	3	9	0	1	485.147	1	dOxyKDN1MeCys
	21	27	1	12	0	0	485.153	3	dAmidKDN1Me1Hb	dAmidKDN2Me1Lt	dAmidKDN3Me1Gc
	18	26	6	8	1	0	485.155	1	AmidPse1Am1PO4
	19	27	5	8	0	1	485.158	2	OxyPseCys	AmidNeuCys
	20	27	3	11	0	0	485.165	15	KDNThr	Neu1Me1Pr	OxyNeu1Hb	KDN1MeSer	HydroNeu2Ac	dAmidNeuThr	OxyNeu1Me1Lt	OxyNeu2Me1Gc	OxyKDN1MeAla	OxyKDN2MeGly	AmidKDN1Me1Pr	dAmidNeu1MeSer	HydroKDN1Ac1Am	HydroNeu1Me1Ac1Fo	HydroKDN1Me1Fo1Am
	21	31	3	10	0	0	485.201	2	HydroNeu3Me1Ac	HydroKDN3Me1Am
	22	27	7	6	0	0	485.202	1	dHydroPseHis
	20	31	5	9	0	0	485.212	6	HydroPseThr	RedPse1Am1Gc	RedPse1FoAla	RedPse1AcGly	HydroPse1MeSer	RedPse1Me1FoGly
	21	35	5	8	0	0	485.249	3	RedPseVal	RedPse2MeAla	RedPse3MeGly
	18	21	3	11	1	0	486.091	3	dHydroNeu1Ac1PO4	dHydroKDN1Am1PO4	dHydroNeu1Me1Fo1PO4
	19	22	2	13	0	0	486.112	1	OxyKDN1Fo1Gc
	19	25	3	10	1	0	486.128	1	dHydroNeu3Me1PO4
	18	24	5	9	0	1	486.13	1	dHydroPse1SO4Gly
	18	25	5	9	1	0	486.139	4	Pse1Am1PO4	AmidPse1Ac1PO4	dOxyPse1PO4Gly	AmidPse1Me1Fo1PO4
	19	26	4	9	0	1	486.142	2	NeuCys	AmidKDNCys
	20	26	2	12	0	0	486.149	9	KDN1Me1Pr	OxyKDN1Hb	HydroKDN2Ac	dAmidKDNThr	OxyKDN1Me1Lt	OxyKDN2Me1Gc	dAmidNeu1Me1Pr	dAmidKDN1MeSer	HydroKDN1Me1Ac1Fo
	19	26	4	11	0	0	486.16	2	OxyNeuSer	HydroNeu1FoGly
	19	28	5	8	0	1	486.166	1	dOxyPse1Me1Am1SO4
	19	29	5	8	1	0	486.175	1	AmidPse3Me1PO4
	21	30	2	11	0	0	486.185	1	HydroKDN3Me1Ac
	20	30	4	10	0	0	486.196	8	RedNeu1Ac1Am	RedPse1Fo1Lt	RedPse1Ac1Gc	HydroNeu1MeAla	HydroNeu2MeGly	HydroPse1Me1Pr	RedNeu1Me1Fo1Am	RedPse1Me1Fo1Gc
	23	30	6	6	0	0	486.223	1	dHydroPse1AmPro
	21	34	4	9	0	0	486.233	4	RedNeu3Me1Am	RedPse1Me1Hb	RedPse2Me1Lt	RedPse3Me1Gc
	18	20	2	12	1	0	487.075	2	dHydroKDN1Ac1PO4	dHydroKDN1Me1Fo1PO4
	19	24	2	11	1	0	487.112	1	dHydroKDN3Me1PO4
	18	23	4	10	0	1	487.113	2	dHydroNeu1Am1SO4	dHydroPse1Gc1SO4
	18	24	4	10	1	0	487.123	5	Pse1Ac1PO4	Pse1Me1Fo1PO4	dOxyNeu1Am1PO4	dOxyPse1Gc1PO4	dAmidPse1Am1PO4
	19	25	3	10	0	1	487.126	2	KDNCys	dAmidNeuCys
	20	25	1	13	0	0	487.133	1	dAmidKDN1Me1Pr
	19	25	3	12	0	0	487.144	4	OxyNeu1Pr	OxyKDNSer	HydroNeu1Fo1Gc	HydroKDN1FoGly
	19	27	4	9	0	1	487.15	2	dOxyPse1Me1Ac1SO4	dOxyPse2Me1Fo1SO4
	19	28	4	9	1	0	487.159	1	Pse3Me1PO4
	18	27	6	8	0	1	487.161	1	AmidPse1Am1SO4
	19	29	5	8	0	1	487.174	1	HydroPseCys
	20	29	3	11	0	0	487.18	9	RedNeu2Ac	HydroNeu1Hb	RedKDN1Ac1Am	HydroNeu1Me1Lt	HydroNeu2Me1Gc	HydroKDN1MeAla	HydroKDN2MeGly	RedNeu1Me1Ac1Fo	RedKDN1Me1Fo1Am
	23	29	5	7	0	0	487.207	3	dHydroPse1AcPro	dHydroPse1Me2Ac1Am	dHydroPse1Me1FoPro
	21	33	3	10	0	0	487.217	2	RedNeu3Me1Ac	RedKDN3Me1Am
	22	29	7	6	0	0	487.218	1	dOxyPseHis
	20	33	5	9	0	0	487.228	2	RedPseThr	RedPse1MeSer
	24	33	5	6	0	0	487.243	1	dHydroPse3MePro
	18	22	3	11	0	1	488.098	3	dHydroNeu1Ac1SO4	dHydroKDN1Am1SO4	dHydroNeu1Me1Fo1SO4
	18	23	3	11	1	0	488.107	5	dOxyNeu1Ac1PO4	dOxyKDN1Am1PO4	dAmidPse1Ac1PO4	dOxyNeu1Me1Fo1PO4	dAmidPse1Me1Fo1PO4
	19	24	2	11	0	1	488.11	1	dAmidKDNCys
	19	24	2	13	0	0	488.128	2	OxyKDN1Pr	HydroKDN1Fo1Gc
	19	26	3	10	0	1	488.134	1	dHydroNeu3Me1SO4
	19	27	3	10	1	0	488.143	2	dOxyNeu3Me1PO4	dAmidPse3Me1PO4
	18	26	5	9	0	1	488.145	4	Pse1Am1SO4	AmidPse1Ac1SO4	dOxyPse1SO4Gly	AmidPse1Me1Fo1SO4
	20	28	2	12	0	0	488.164	5	RedKDN2Ac	HydroKDN1Hb	HydroKDN1Me1Lt	HydroKDN2Me1Gc	RedKDN1Me1Ac1Fo
	19	28	4	11	0	0	488.175	2	HydroNeuSer	RedNeu1FoGly
	19	30	5	8	0	1	488.182	1	AmidPse3Me1SO4
	23	28	4	8	0	0	488.191	1	dHydroPse1Me3Ac
	21	32	2	11	0	0	488.201	1	RedKDN3Me1Ac
	22	28	6	7	0	0	488.202	3	dHydroPse1Fo1AmAla	dHydroPse1Ac1AmGly	dHydroPse1Me1Fo1AmGly
	20	32	4	10	0	0	488.212	3	RedNeu1MeAla	RedNeu2MeGly	RedPse1Me1Pr
	23	32	6	6	0	0	488.238	4	dOxyPse1AmPro	dHydroPse1AmVal	dHydroPse2Me1AmAla	dHydroPse3Me1AmGly
	18	21	2	12	0	1	489.082	2	dHydroKDN1Ac1SO4	dHydroKDN1Me1Fo1SO4
	18	22	2	12	1	0	489.091	2	dOxyKDN1Ac1PO4	dOxyKDN1Me1Fo1PO4
	17	22	4	11	1	0	489.102	2	OxyPse1Fo1PO4	AmidNeu1Fo1PO4
	19	25	2	11	0	1	489.118	1	dHydroKDN3Me1SO4
	19	26	2	11	1	0	489.127	1	dOxyKDN3Me1PO4
	18	25	4	10	0	1	489.129	5	Pse1Ac1SO4	Pse1Me1Fo1SO4	dOxyNeu1Am1SO4	dOxyPse1Gc1SO4	dAmidPse1Am1SO4
	18	26	4	10	1	0	489.139	2	OxyPse2Me1PO4	AmidNeu2Me1PO4
	19	27	3	12	0	0	489.159	4	HydroNeu1Pr	HydroKDNSer	RedNeu1Fo1Gc	RedKDN1FoGly
	19	29	4	9	0	1	489.166	1	Pse3Me1SO4
	22	27	5	8	0	0	489.186	6	dHydroPse2AcGly	dHydroPse1Fo1Am1Lt	dHydroPse1Ac1Am1Gc	dHydroPse1Ac1FoAla	dHydroPse1Me1Fo1Am1Gc	dHydroPse1Me1Ac1FoGly
	19	31	5	8	0	1	489.189	1	RedPseCys
	20	31	3	11	0	0	489.196	5	RedNeu1Hb	RedNeu1Me1Lt	RedNeu2Me1Gc	RedKDN1MeAla	RedKDN2MeGly
	23	31	5	7	0	0	489.222	11	dOxyPse1AcPro	dHydroPse1FoLeu	dHydroPse1AcVal	dOxyPse1Me2Ac1Am	dOxyPse1Me1FoPro	dHydroPse1Me1Hb1Am	dHydroPse2Me1Am1Lt	dHydroPse2Me1AcAla	dHydroPse3Me1FoAla	dHydroPse3Me1AcGly	dHydroPse1Me1FoVal
	24	35	5	6	0	0	489.259	3	dOxyPse3MePro	dHydroPse2MeLeu	dHydroPse3MeVal
	17	21	3	12	1	0	490.086	2	Neu1Fo1PO4	AmidKDN1Fo1PO4
	18	24	3	11	0	1	490.113	5	dOxyNeu1Ac1SO4	dOxyKDN1Am1SO4	dAmidPse1Ac1SO4	dOxyNeu1Me1Fo1SO4	dAmidPse1Me1Fo1SO4
	18	25	3	11	1	0	490.123	2	Neu2Me1PO4	AmidKDN2Me1PO4
	19	26	2	13	0	0	490.144	2	HydroKDN1Pr	RedKDN1Fo1Gc
	19	28	3	10	0	1	490.149	2	dOxyNeu3Me1SO4	dAmidPse3Me1SO4
	22	26	4	9	0	0	490.17	6	dHydroNeu2Ac1Am	dHydroNeu1FoPro	dHydroPse2Ac1Gc	dHydroPse1Ac1Fo1Lt	dHydroNeu1Me1Ac1Fo1Am	dHydroPse1Me1Ac1Fo1Gc
	20	30	2	12	0	0	490.18	3	RedKDN1Hb	RedKDN1Me1Lt	RedKDN2Me1Gc
	21	26	6	8	0	0	490.181	1	dHydroPse1FoAsn
	19	30	4	11	0	0	490.191	1	RedNeuSer
	23	30	4	8	0	0	490.206	5	dOxyPse1Me3Ac	dHydroNeu2MePro	dHydroPse1Me1Ac1Hb	dHydroPse2Me1Hb1Fo	dHydroPse2Me1Ac1Lt
	22	30	6	7	0	0	490.218	10	AmidPse2Ac1Am	AmidPse1FoPro	dHydroPse2MeAsn	dHydroPse1MeGln	dHydroPse1AmThr	dOxyPse1Fo1AmAla	dOxyPse1Ac1AmGly	dHydroPse1Me1AmSer	AmidPse1Me1Ac1Fo1Am	dOxyPse1Me1Fo1AmGly
	23	34	6	6	0	0	490.254	5	AmidPse2MePro	dOxyPse1AmVal	dHydroPse1MeLys	dOxyPse2Me1AmAla	dOxyPse3Me1AmGly
	17	20	2	13	1	0	491.07	2	KDN1Fo1PO4	dAmidNeu1Fo1PO4
	18	23	2	12	0	1	491.097	2	dOxyKDN1Ac1SO4	dOxyKDN1Me1Fo1SO4
	18	24	2	12	1	0	491.107	2	KDN2Me1PO4	dAmidNeu2Me1PO4
	17	23	4	11	0	1	491.108	2	OxyPse1Fo1SO4	AmidNeu1Fo1SO4
	17	24	4	11	1	0	491.118	1	HydroPse1Fo1PO4
	19	27	2	11	0	1	491.134	1	dOxyKDN3Me1SO4
	18	27	4	10	0	1	491.145	2	OxyPse2Me1SO4	AmidNeu2Me1SO4
	22	25	3	10	0	0	491.154	5	dHydroNeu3Ac	dHydroKDN2Ac1Am	dHydroKDN1FoPro	dHydroNeu1Me2Ac1Fo	dHydroKDN1Me1Ac1Fo1Am
	18	28	4	10	1	0	491.154	1	HydroPse2Me1PO4
	21	25	5	9	0	0	491.165	3	dHydroPse1FoAsp	dHydroNeu1Fo1AmGly	dHydroPse1Fo1GcGly
	19	29	3	12	0	0	491.175	2	RedNeu1Pr	RedKDNSer
	23	29	3	9	0	0	491.19	1	dHydroKDN2MePro
	22	29	5	8	0	0	491.202	25	Pse2Ac1Am	Pse1FoPro	AmidPse3Ac	dOxyPse2AcGly	Pse1Me1Ac1Fo1Am	dHydroPse1LtAla	dHydroPse2MeAsp	dHydroPse1MeGlu	dHydroPse1HbGly	dHydroPse1AcThr	AmidPse1Me2Ac1Fo	dOxyPse1Fo1Am1Lt	dOxyPse1Ac1Am1Gc	dOxyPse1Ac1FoAla	dHydroNeu1Me1AmAla	dHydroNeu2Me1AmGly	dHydroPse1Me1Pr1Am	dHydroPse1Me1GcAla	dHydroPse1Me1LtGly	dHydroPse2Me1GcGly	dHydroPse1Me1AcSer	dHydroPse2Me1FoSer	dHydroPse1Me1FoThr	dOxyPse1Me1Fo1Am1Gc	dOxyPse1Me1Ac1FoGly
	21	29	7	7	0	0	491.213	1	AmidPse1Fo1AmGly
	23	33	5	7	0	0	491.238	10	Pse2MePro	dOxyPse1FoLeu	dOxyPse1AcVal	dHydroPse3MeThr	dOxyPse1Me1Hb1Am	dOxyPse2Me1Am1Lt	dOxyPse2Me1AcAla	dOxyPse3Me1FoAla	dOxyPse3Me1AcGly	dOxyPse1Me1FoVal
	22	33	7	6	0	0	491.249	2	AmidPse1Me1AmAla	AmidPse2Me1AmGly
	24	37	5	6	0	0	491.274	2	dOxyPse2MeLeu	dOxyPse3MeVal
	17	19	1	14	1	0	492.054	1	dAmidKDN1Fo1PO4
	18	23	1	13	1	0	492.091	1	dAmidKDN2Me1PO4
	17	22	3	12	0	1	492.092	2	Neu1Fo1SO4	AmidKDN1Fo1SO4
	17	23	3	12	1	0	492.102	1	OxyNeu1Me1PO4
	18	26	3	11	0	1	492.129	2	Neu2Me1SO4	AmidKDN2Me1SO4
	22	24	2	11	0	0	492.138	2	dHydroKDN3Ac	dHydroKDN1Me2Ac1Fo
	21	24	4	10	0	0	492.149	3	dHydroNeu1Fo1Am1Gc	dHydroNeu1Ac1FoGly	dHydroKDN1Fo1AmGly
	19	28	2	13	0	0	492.159	1	RedKDN1Pr
	21	28	6	6	0	1	492.179	1	dHydroPse1AmCys
	22	28	4	9	0	0	492.186	25	Pse3Ac	Pse1Me2Ac1Fo	dOxyNeu2Ac1Am	dOxyNeu1FoPro	dOxyPse2Ac1Gc	dAmidPse2Ac1Am	dAmidPse1FoPro	dHydroNeu1Hb1Am	dHydroNeu1FoVal	dHydroPse1Hb1Gc	dOxyPse1Ac1Fo1Lt	dHydroNeu1Me1Am1Lt	dHydroNeu2Me1Am1Gc	dHydroNeu1Me1AcAla	dHydroNeu2Me1FoAla	dHydroNeu2Me1AcGly	dHydroNeu3Me1FoGly	dHydroPse1Me1Gc1Lt	dHydroPse1Me1Ac1Pr	dHydroPse2Me1Pr1Fo	dHydroKDN1Me1AmAla	dHydroKDN2Me1AmGly	dOxyNeu1Me1Ac1Fo1Am	dOxyPse1Me1Ac1Fo1Gc	dAmidPse1Me1Ac1Fo1Am
	21	28	6	8	0	0	492.197	4	Pse1Fo1AmGly	dOxyPse1FoAsn	AmidPse1Fo1Am1Gc	AmidPse1Ac1FoGly
	23	32	4	8	0	0	492.222	7	dOxyNeu2MePro	dAmidPse2MePro	dHydroNeu1MeLeu	dHydroNeu2MeVal	dOxyPse1Me1Ac1Hb	dOxyPse2Me1Hb1Fo	dOxyPse2Me1Ac1Lt
	22	32	6	7	0	0	492.233	14	Pse1Me1AmAla	Pse2Me1AmGly	AmidPse1Hb1Am	dOxyPse2MeAsn	dOxyPse1MeGln	dOxyPse1AmThr	AmidPse1FoVal	AmidPse1Me1Am1Lt	AmidPse2Me1Am1Gc	AmidPse1Me1AcAla	AmidPse2Me1FoAla	AmidPse2Me1AcGly	AmidPse3Me1FoGly	dOxyPse1Me1AmSer
	23	36	6	6	0	0	492.27	3	AmidPse1MeLeu	dOxyPse1MeLys	AmidPse2MeVal
	17	21	2	13	0	1	493.076	2	KDN1Fo1SO4	dAmidNeu1Fo1SO4
	17	22	2	13	1	0	493.086	1	OxyKDN1Me1PO4
	18	25	2	12	0	1	493.113	2	KDN2Me1SO4	dAmidNeu2Me1SO4
	17	25	4	11	0	1	493.124	1	HydroPse1Fo1SO4
	21	23	3	11	0	0	493.133	3	dHydroNeu1Ac1Fo1Gc	dHydroKDN1Fo1Am1Gc	dHydroKDN1Ac1FoGly
	17	26	4	11	1	0	493.134	1	RedPse1Fo1PO4
	18	29	4	10	0	1	493.16	1	HydroPse2Me1SO4
	21	27	5	7	0	1	493.163	2	dHydroPse1AcCys	dHydroPse1Me1FoCys
	22	27	3	10	0	0	493.17	20	dOxyNeu3Ac	dAmidPse3Ac	dOxyKDN2Ac1Am	dOxyKDN1FoPro	dHydroNeu1Ac1Hb	dHydroKDN1Hb1Am	dHydroKDN1FoVal	dOxyNeu1Me2Ac1Fo	dAmidPse1Me2Ac1Fo	dHydroNeu1Me1Hb1Fo	dHydroNeu1Me1Ac1Lt	dHydroNeu2Me1Fo1Lt	dHydroNeu2Me1Ac1Gc	dHydroKDN1Me1Am1Lt	dHydroKDN2Me1Am1Gc	dHydroKDN1Me1AcAla	dHydroKDN2Me1FoAla	dHydroKDN2Me1AcGly	dHydroKDN3Me1FoGly	dOxyKDN1Me1Ac1Fo1Am
	18	30	4	10	1	0	493.17	1	RedPse2Me1PO4
	21	27	5	9	0	0	493.181	14	dHydroNeuGln	Pse1Fo1Am1Gc	Pse1Ac1FoGly	dOxyPse1FoAsp	dHydroNeu1MeAsn	dHydroNeu1AmSer	OxyPse1Ac1Fo1Am	dHydroPse1PrGly	dHydroPse1GcSer	AmidNeu1Ac1Fo1Am	dOxyNeu1Fo1AmGly	AmidPse1Ac1Fo1Gc	dOxyPse1Fo1GcGly	dAmidPse1Fo1AmGly
	22	31	5	6	0	1	493.2	2	dHydroPse3MeCys	dHydroPse1MeMet
	23	31	3	9	0	0	493.206	4	dOxyKDN2MePro	dHydroNeu3Me1Hb	dHydroKDN1MeLeu	dHydroKDN2MeVal
	22	31	5	8	0	0	493.217	34	Pse1Hb1Am	Pse1FoVal	dHydroNeuLys	Pse1Me1Am1Lt	Pse2Me1Am1Gc	Pse1Me1AcAla	Pse2Me1FoAla	Pse2Me1AcGly	Pse3Me1FoGly	OxyPse1MePro	AmidNeu1MePro	AmidPse1Ac1Hb	dOxyPse1LtAla	dOxyPse2MeAsp	dOxyPse1MeGlu	dOxyPse1HbGly	dOxyPse1AcThr	OxyPse2Me1Ac1Am	AmidNeu2Me1Ac1Am	dOxyNeu1Me1AmAla	dOxyNeu2Me1AmGly	AmidPse1Me1Hb1Fo	AmidPse1Me1Ac1Lt	AmidPse2Me1Fo1Lt	AmidPse2Me1Ac1Gc	dOxyPse1Me1Pr1Am	dOxyPse1Me1GcAla	dOxyPse1Me1LtGly	dOxyPse2Me1GcGly	dOxyPse1Me1AcSer	dOxyPse2Me1FoSer	dOxyPse1Me1FoThr	dAmidPse1Me1AmAla	dAmidPse2Me1AmGly
	21	31	7	7	0	0	493.228	3	AmidPseGln	AmidPse1MeAsn	AmidPse1AmSer
	23	35	5	7	0	0	493.254	4	Pse1MeLeu	Pse2MeVal	AmidPse3Me1Hb	dOxyPse3MeThr
	22	35	7	6	0	0	493.265	1	AmidPseLys
	17	20	1	14	0	1	494.06	1	dAmidKDN1Fo1SO4
	18	24	1	13	0	1	494.097	1	dAmidKDN2Me1SO4
	17	24	3	12	0	1	494.108	1	OxyNeu1Me1SO4
	21	22	2	12	0	0	494.117	1	dHydroKDN1Ac1Fo1Gc
	17	25	3	12	1	0	494.118	1	HydroNeu1Me1PO4
	22	26	2	11	0	0	494.154	7	dOxyKDN3Ac	dHydroKDN1Ac1Hb	dOxyKDN1Me2Ac1Fo	dHydroKDN1Me1Hb1Fo	dHydroKDN1Me1Ac1Lt	dHydroKDN2Me1Fo1Lt	dHydroKDN2Me1Ac1Gc
	21	26	4	10	0	0	494.165	23	Neu1Ac1Fo1Am	dHydroNeuGlu	Pse1Ac1Fo1Gc	OxyPse2Ac1Fo	dHydroKDNGln	AmidNeu2Ac1Fo	dHydroNeu1Pr1Am	dHydroNeu1GcAla	dHydroNeu1MeAsp	dHydroNeu1LtGly	dHydroNeu1AcSer	dHydroNeu1FoThr	dHydroPse1Pr1Gc	dHydroKDN1MeAsn	dHydroKDN1AmSer	dOxyNeu1Fo1Am1Gc	dOxyNeu1Ac1FoGly	AmidKDN1Ac1Fo1Am	dOxyKDN1Fo1AmGly	dAmidPse1Fo1Am1Gc	dAmidPse1Ac1FoGly	dHydroNeu1Me1GcGly	dHydroNeu1Me1FoSer
	23	30	2	10	0	0	494.19	1	dHydroKDN3Me1Hb
	21	30	6	6	0	1	494.195	1	dOxyPse1AmCys
	22	30	4	9	0	0	494.201	38	Neu1MePro	Pse1Ac1Hb	Neu2Me1Ac1Am	Pse1Me1Hb1Fo	Pse1Me1Ac1Lt	Pse2Me1Fo1Lt	Pse2Me1Ac1Gc	OxyPse2Me2Ac	dHydroPseFuc	dHydroKDNLys	AmidNeu2Me2Ac	dOxyNeu1Hb1Am	dOxyNeu1FoVal	dOxyPse1Hb1Gc	AmidKDN1MePro	dAmidPse1Hb1Am	dAmidPse1FoVal	dHydroNeu3MeSer	dHydroNeu2MeThr	dHydroPse1MeXyl	dOxyNeu1Me1Am1Lt	dOxyNeu2Me1Am1Gc	dOxyNeu1Me1AcAla	dOxyNeu2Me1FoAla	dOxyNeu2Me1AcGly	dOxyNeu3Me1FoGly	dOxyPse1Me1Gc1Lt	dOxyPse1Me1Ac1Pr	dOxyPse2Me1Pr1Fo	AmidKDN2Me1Ac1Am	dOxyKDN1Me1AmAla	dOxyKDN2Me1AmGly	dAmidPse1Me1Am1Lt	dAmidPse2Me1Am1Gc	dAmidPse1Me1AcAla	dAmidPse2Me1FoAla	dAmidPse2Me1AcGly	dAmidPse3Me1FoGly
	21	30	6	8	0	0	494.212	16	PseGln	Pse1MeAsn	Pse1AmSer	AmidPseGlu	OxyPse1AmAla	AmidNeu1AmAla	AmidPse1Pr1Am	AmidPse1GcAla	AmidPse1MeAsp	AmidPse1LtGly	AmidPse1AcSer	AmidPse1FoThr	OxyPse1Me1AmGly	AmidNeu1Me1AmGly	AmidPse1Me1GcGly	AmidPse1Me1FoSer
	23	34	4	8	0	0	494.238	5	Pse3Me1Hb	dOxyNeu1MeLeu	dOxyNeu2MeVal	dAmidPse1MeLeu	dAmidPse2MeVal
	22	34	6	7	0	0	494.249	3	PseLys	AmidPse3MeSer	AmidPse2MeThr
	17	23	2	13	0	1	495.092	1	OxyKDN1Me1SO4
	17	24	2	13	1	0	495.102	1	HydroKDN1Me1PO4
	17	27	4	11	0	1	495.14	1	RedPse1Fo1SO4
	21	25	3	11	0	0	495.149	20	Neu2Ac1Fo	KDN1Ac1Fo1Am	dHydroKDNGlu	AmidKDN2Ac1Fo	dHydroNeu1Gc1Lt	dHydroNeu1Ac1Pr	dHydroKDN1Pr1Am	dHydroKDN1GcAla	dHydroKDN1MeAsp	dHydroKDN1LtGly	dHydroKDN1AcSer	dHydroKDN1FoThr	dOxyNeu1Ac1Fo1Gc	dOxyKDN1Fo1Am1Gc	dOxyKDN1Ac1FoGly	dAmidNeu1Ac1Fo1Am	dAmidPse1Ac1Fo1Gc	dHydroNeu1Me1Pr1Fo	dHydroKDN1Me1GcGly	dHydroKDN1Me1FoSer
	18	31	4	10	0	1	495.176	1	RedPse2Me1SO4
	21	29	5	7	0	1	495.179	2	dOxyPse1AcCys	dOxyPse1Me1FoCys
	22	29	3	10	0	0	495.185	27	Neu2Me2Ac	KDN1MePro	KDN2Me1Ac1Am	dOxyNeu1Ac1Hb	AmidKDN2Me2Ac	dOxyKDN1Hb1Am	dOxyKDN1FoVal	dAmidNeu1MePro	dAmidPse1Ac1Hb	dHydroNeu3Me1Pr	dHydroKDN3MeSer	dHydroKDN2MeThr	dOxyNeu1Me1Hb1Fo	dOxyNeu1Me1Ac1Lt	dOxyNeu2Me1Fo1Lt	dOxyNeu2Me1Ac1Gc	dOxyKDN1Me1Am1Lt	dOxyKDN2Me1Am1Gc	dOxyKDN1Me1AcAla	dOxyKDN2Me1FoAla	dOxyKDN2Me1AcGly	dOxyKDN3Me1FoGly	dAmidNeu2Me1Ac1Am	dAmidPse1Me1Hb1Fo	dAmidPse1Me1Ac1Lt	dAmidPse2Me1Fo1Lt	dAmidPse2Me1Ac1Gc
	21	29	5	9	0	0	495.197	37	PseGlu	Neu1AmAla	Pse1Pr1Am	Pse1GcAla	Pse1MeAsp	Pse1LtGly	Pse1AcSer	Pse1FoThr	dOxyNeuGln	dAmidPseGln	Neu1Me1AmGly	OxyPse1Am1Lt	OxyPse1AcAla	Pse1Me1GcGly	Pse1Me1FoSer	AmidNeu1Am1Lt	AmidNeu1AcAla	dOxyNeu1MeAsn	dOxyNeu1AmSer	AmidPse1Gc1Lt	AmidPse1Ac1Pr	dOxyPse1PrGly	dOxyPse1GcSer	AmidKDN1AmAla	dAmidPse1MeAsn	dAmidPse1AmSer	OxyPse1Me1Am1Gc	OxyPse1Me1FoAla	OxyPse1Me1AcGly	OxyPse2Me1FoGly	AmidNeu1Me1Am1Gc	AmidNeu1Me1FoAla	AmidNeu1Me1AcGly	AmidNeu2Me1FoGly	AmidPse1Me1Pr1Fo	AmidKDN1Me1AmGly	HydroPse1Ac1Fo1Am
	25	29	5	6	0	0	495.212	1	dHydroPsePhe
	22	33	5	6	0	1	495.215	2	dOxyPse3MeCys	dOxyPse1MeMet
	23	33	3	9	0	0	495.222	4	dOxyNeu3Me1Hb	dOxyKDN1MeLeu	dOxyKDN2MeVal	dAmidPse3Me1Hb
	22	33	5	8	0	0	495.233	13	OxyPseLeu	Pse3MeSer	Pse2MeThr	AmidNeuLeu	dOxyNeuLys	dAmidPseLys	OxyPse3MeAla	OxyPse1MeVal	AmidNeu3MeAla	AmidNeu1MeVal	AmidPse3Me1Pr	HydroPse1MePro	HydroPse2Me1Ac1Am
	19	23	5	9	1	0	496.123	1	dHydroPse1Fo1Am1PO4
	17	26	3	12	0	1	496.124	1	HydroNeu1Me1SO4
	20	24	4	9	0	1	496.126	1	dHydroNeu1FoCys
	21	24	2	12	0	0	496.133	7	KDN2Ac1Fo	dAmidNeu2Ac1Fo	dHydroKDN1Gc1Lt	dHydroKDN1Ac1Pr	dOxyKDN1Ac1Fo1Gc	dAmidKDN1Ac1Fo1Am	dHydroKDN1Me1Pr1Fo
	17	27	3	12	1	0	496.133	1	RedNeu1Me1PO4
	20	27	5	8	1	0	496.16	1	dHydroPse2Me1Am1PO4
	21	28	4	8	0	1	496.163	2	dHydroNeuMet	dHydroNeu2MeCys
	22	28	2	11	0	0	496.169	10	KDN2Me2Ac	dOxyKDN1Ac1Hb	dAmidNeu2Me2Ac	dAmidKDN1MePro	dHydroKDN3Me1Pr	dOxyKDN1Me1Hb1Fo	dOxyKDN1Me1Ac1Lt	dOxyKDN2Me1Fo1Lt	dOxyKDN2Me1Ac1Gc	dAmidKDN2Me1Ac1Am
	20	28	6	7	0	1	496.174	1	AmidPse1FoCys
	21	28	4	10	0	0	496.18	55	Neu1Am1Lt	Neu1AcAla	OxyNeuPro	Pse1Gc1Lt	Pse1Ac1Pr	KDN1AmAla	dOxyNeuGlu	dOxyKDNGln	dAmidPseGlu	Neu1Me1Am1Gc	Neu1Me1FoAla	Neu1Me1AcGly	Neu2Me1FoGly	Pse1Me1Pr1Fo	OxyPse1Hb1Fo	OxyPse1Ac1Lt	KDN1Me1AmGly	AmidNeu1Hb1Fo	AmidNeu1Ac1Lt	dOxyNeu1Pr1Am	dOxyNeu1GcAla	dOxyNeu1MeAsp	dOxyNeu1LtGly	dOxyNeu1AcSer	dOxyNeu1FoThr	dOxyPse1Pr1Gc	AmidKDN1Am1Lt	AmidKDN1AcAla	dOxyKDN1MeAsn	dOxyKDN1AmSer	dAmidNeu1AmAla	dAmidPse1Pr1Am	HydroPse2Ac1Fo	dAmidPse1GcAla	dAmidPse1MeAsp	dAmidPse1LtGly	dAmidPse1AcSer	dAmidPse1FoThr	OxyNeu1Me1Ac1Am	OxyNeu2Me1Fo1Am	OxyPse1Me1Fo1Lt
	20	28	6	9	0	0	496.192	2	OxyPseAsn	AmidNeuAsn
	23	32	2	10	0	0	496.206	1	dOxyKDN3Me1Hb
	21	32	6	6	0	1	496.21	2	AmidPseMet	AmidPse2MeCys
	22	32	4	9	0	0	496.217	19	NeuLeu	Neu3MeAla	Neu1MeVal	Pse3Me1Pr	dOxyPseFuc	AmidKDNLeu	dOxyKDNLys	OxyPse2Me1Hb	OxyPse3Me1Lt	AmidNeu2Me1Hb	AmidNeu3Me1Lt	dOxyNeu3MeSer	dOxyNeu2MeThr	dOxyPse1MeXyl	AmidKDN3MeAla	AmidKDN1MeVal	HydroPse2Me2Ac	dAmidPse3MeSer	dAmidPse2MeThr
	21	32	6	8	0	0	496.228	2	HydroPse1AmAla	HydroPse1Me1AmGly
	19	22	4	10	1	0	497.107	1	dHydroPse1Ac1Fo1PO4
	17	25	2	13	0	1	497.108	1	HydroKDN1Me1SO4
	20	23	3	10	0	1	497.11	1	dHydroKDN1FoCys
	21	23	1	13	0	0	497.117	1	dAmidKDN2Ac1Fo
	17	26	2	13	1	0	497.117	1	RedKDN1Me1PO4
	20	26	4	9	1	0	497.144	1	dHydroPse2Me1Ac1PO4
	21	27	3	9	0	1	497.147	2	dHydroKDNMet	dHydroKDN2MeCys
	22	27	1	12	0	0	497.153	1	dAmidKDN2Me2Ac
	20	27	5	8	0	1	497.158	1	Pse1FoCys
	21	27	3	11	0	0	497.165	45	Neu1Hb1Fo	Neu1Ac1Lt	KDN1Am1Lt	KDN1AcAla	OxyKDNPro	dOxyKDNGlu	Neu1Me1Fo1Lt	Neu1Me1Ac1Gc	Neu2Me1Fo1Gc	OxyNeu1Me2Ac	dHydroNeuXyl	KDN1Me1Am1Gc	KDN1Me1FoAla	KDN1Me1AcGly	KDN2Me1FoGly	dOxyNeu1Gc1Lt	dOxyNeu1Ac1Pr	AmidKDN1Hb1Fo	AmidKDN1Ac1Lt	dOxyKDN1Pr1Am	dOxyKDN1GcAla	dOxyKDN1MeAsp	dOxyKDN1LtGly	dOxyKDN1AcSer	dOxyKDN1FoThr	dAmidNeu1Am1Lt	dAmidNeu1AcAla	dAmidPse1Gc1Lt	dAmidPse1Ac1Pr	dAmidKDN1AmAla	OxyNeu2Me1Ac1Fo	OxyKDN1Me1Ac1Am	OxyKDN2Me1Fo1Am	dOxyNeu1Me1Pr1Fo	AmidKDN1Me1Fo1Lt	AmidKDN1Me1Ac1Gc	AmidKDN2Me1Fo1Gc	dOxyKDN1Me1GcGly	dOxyKDN1Me1FoSer	dAmidNeu1Me1Am1Gc	dAmidNeu1Me1FoAla
	20	27	5	10	0	0	497.176	9	NeuAsn	OxyPseAsp	AmidNeuAsp	AmidKDNAsn	OxyNeu1AmGly	OxyPse1GcGly	OxyPse1FoSer	AmidNeu1GcGly	AmidNeu1FoSer
	21	31	5	7	0	1	497.194	2	PseMet	Pse2MeCys
	22	31	3	10	0	0	497.201	14	KDNLeu	Neu2Me1Hb	Neu3Me1Lt	KDN3MeAla	KDN1MeVal	dAmidNeuLeu	dOxyNeu3Me1Pr	AmidKDN2Me1Hb	AmidKDN3Me1Lt	dOxyKDN3MeSer	dOxyKDN2MeThr	dAmidNeu3MeAla	dAmidNeu1MeVal	dAmidPse3Me1Pr
	21	31	5	9	0	0	497.212	12	AmidPseXyl	OxyPse2MeSer	OxyPse1MeThr	AmidNeu2MeSer	AmidNeu1MeThr	HydroPse1Am1Lt	HydroPse1AcAla	RedPse1Ac1Fo1Am	HydroPse1Me1Am1Gc	HydroPse1Me1FoAla	HydroPse1Me1AcGly	HydroPse2Me1FoGly
	25	31	5	6	0	0	497.227	1	dOxyPsePhe
	22	35	5	8	0	0	497.249	5	HydroPseLeu	RedPse1MePro	HydroPse3MeAla	HydroPse1MeVal	RedPse2Me1Ac1Am
	19	24	5	9	0	1	498.13	1	dHydroPse1Fo1Am1SO4
	19	25	5	9	1	0	498.139	3	dHydroPse1PO4Ala	dOxyPse1Fo1Am1PO4	dHydroPse1Me1PO4Gly
	17	28	3	12	0	1	498.139	1	RedNeu1Me1SO4
	20	26	4	9	0	1	498.142	2	dOxyNeu1FoCys	dAmidPse1FoCys
	21	26	2	12	0	0	498.149	22	KDN1Hb1Fo	KDN1Ac1Lt	KDN1Me1Fo1Lt	KDN1Me1Ac1Gc	KDN2Me1Fo1Gc	OxyKDN1Me2Ac	dHydroKDNXyl	dOxyKDN1Gc1Lt	dOxyKDN1Ac1Pr	dAmidNeu1Hb1Fo	dAmidNeu1Ac1Lt	dAmidKDN1Am1Lt	dAmidKDN1AcAla	OxyKDN2Me1Ac1Fo	dOxyKDN1Me1Pr1Fo	dAmidNeu1Me1Fo1Lt	dAmidNeu1Me1Ac1Gc	dAmidNeu2Me1Fo1Gc	dAmidKDN1Me1Am1Gc	dAmidKDN1Me1FoAla	dAmidKDN1Me1AcGly	dAmidKDN2Me1FoGly
	20	26	4	11	0	0	498.16	15	NeuAsp	KDNAsn	Neu1GcGly	Neu1FoSer	AmidKDNAsp	dAmidNeuAsn	OxyNeu1Am1Gc	OxyNeu1FoAla	OxyNeu1AcGly	OxyPse1Pr1Fo	OxyKDN1AmGly	AmidNeu1Pr1Fo	AmidKDN1GcGly	AmidKDN1FoSer	OxyNeu1Me1FoGly
	20	28	5	8	0	1	498.166	1	dHydroPse2Me1Am1SO4
	20	29	5	8	1	0	498.175	1	dOxyPse2Me1Am1PO4
	21	30	4	8	0	1	498.178	4	dOxyNeuMet	dAmidPseMet	dOxyNeu2MeCys	dAmidPse2MeCys
	22	30	2	11	0	0	498.185	8	KDN2Me1Hb	KDN3Me1Lt	dAmidKDNLeu	dOxyKDN3Me1Pr	dAmidNeu2Me1Hb	dAmidNeu3Me1Lt	dAmidKDN3MeAla	dAmidKDN1MeVal
	21	30	4	10	0	0	498.196	19	PseXyl	Neu2MeSer	Neu1MeThr	OxyNeuVal	HydroNeuPro	OxyNeu2MeAla	OxyNeu3MeGly	OxyPse2Me1Pr	RedPse2Ac1Fo	AmidNeu2Me1Pr	AmidKDN2MeSer	AmidKDN1MeThr	HydroPse1Hb1Fo	HydroPse1Ac1Lt	HydroNeu1Me1Ac1Am	HydroNeu2Me1Fo1Am	HydroPse1Me1Fo1Lt	HydroPse1Me1Ac1Gc	HydroPse2Me1Fo1Gc
	20	30	6	9	0	0	498.207	1	HydroPseAsn
	22	34	4	9	0	0	498.233	3	RedPse2Me2Ac	HydroPse2Me1Hb	HydroPse3Me1Lt
	21	34	6	8	0	0	498.244	2	RedPse1AmAla	RedPse1Me1AmGly
	19	23	4	10	0	1	499.113	1	dHydroPse1Ac1Fo1SO4
	19	24	4	10	1	0	499.123	4	dHydroPse1Lt1PO4	dOxyPse1Ac1Fo1PO4	dHydroNeu1Me1Am1PO4	dHydroPse1Me1Gc1PO4
	17	27	2	13	0	1	499.123	1	RedKDN1Me1SO4
	20	25	3	10	0	1	499.126	1	dOxyKDN1FoCys
	21	25	1	13	0	0	499.133	5	dAmidKDN1Hb1Fo	dAmidKDN1Ac1Lt	dAmidKDN1Me1Fo1Lt	dAmidKDN1Me1Ac1Gc	dAmidKDN2Me1Fo1Gc
	20	25	3	12	0	0	499.144	16	KDNAsp	Neu1Pr1Fo	KDN1GcGly	KDN1FoSer	dAmidNeuAsp	dAmidKDNAsn	OxyNeu1Fo1Lt	OxyNeu1Ac1Gc	OxyKDN1Am1Gc	OxyKDN1FoAla	OxyKDN1AcGly	AmidKDN1Pr1Fo	dAmidNeu1GcGly	dAmidNeu1FoSer	OxyNeu1Me1Fo1Gc	OxyKDN1Me1FoGly
	20	27	4	9	0	1	499.15	1	dHydroPse2Me1Ac1SO4
	20	28	4	9	1	0	499.159	1	dOxyPse2Me1Ac1PO4
	21	29	3	9	0	1	499.163	2	dOxyKDNMet	dOxyKDN2MeCys
	22	29	1	12	0	0	499.169	2	dAmidKDN2Me1Hb	dAmidKDN3Me1Lt
	19	28	6	8	1	0	499.171	1	AmidPse1Me1Am1PO4
	20	29	5	8	0	1	499.174	2	OxyPse1MeCys	AmidNeu1MeCys
	21	29	3	11	0	0	499.18	19	Neu2Me1Pr	KDN2MeSer	KDN1MeThr	OxyKDNVal	dOxyNeuXyl	dAmidPseXyl	HydroKDNPro	OxyNeu1Me1Hb	OxyNeu2Me1Lt	OxyNeu3Me1Gc	OxyKDN2MeAla	OxyKDN3MeGly	AmidKDN2Me1Pr	HydroNeu1Me2Ac	dAmidNeu2MeSer	dAmidNeu1MeThr	HydroNeu2Me1Ac1Fo	HydroKDN1Me1Ac1Am	HydroKDN2Me1Fo1Am
	20	29	5	10	0	0	499.191	4	HydroPseAsp	HydroNeu1AmGly	HydroPse1GcGly	HydroPse1FoSer
	23	29	7	6	0	0	499.218	1	dHydroPse1MeHis
	21	33	5	9	0	0	499.228	8	RedPse1Am1Lt	RedPse1AcAla	HydroPse2MeSer	HydroPse1MeThr	RedPse1Me1Am1Gc	RedPse1Me1FoAla	RedPse1Me1AcGly	RedPse2Me1FoGly
	22	37	5	8	0	0	499.264	3	RedPseLeu	RedPse3MeAla	RedPse1MeVal
	19	23	3	11	1	0	500.107	3	dHydroNeu1Me1Ac1PO4	dHydroNeu2Me1Fo1PO4	dHydroKDN1Me1Am1PO4
	20	24	2	13	0	0	500.128	8	KDN1Pr1Fo	dAmidKDNAsp	OxyKDN1Fo1Lt	OxyKDN1Ac1Gc	dAmidNeu1Pr1Fo	dAmidKDN1GcGly	dAmidKDN1FoSer	OxyKDN1Me1Fo1Gc
	19	26	5	9	0	1	500.145	3	dHydroPse1SO4Ala	dOxyPse1Fo1Am1SO4	dHydroPse1Me1SO4Gly
	19	27	5	9	1	0	500.155	5	Pse1Me1Am1PO4	dOxyPse1PO4Ala	AmidPse1Me1Ac1PO4	AmidPse2Me1Fo1PO4	dOxyPse1Me1PO4Gly
	20	28	4	9	0	1	500.158	2	Neu1MeCys	AmidKDN1MeCys
	21	28	2	12	0	0	500.164	10	KDN2Me1Pr	dOxyKDNXyl	OxyKDN1Me1Hb	OxyKDN2Me1Lt	OxyKDN3Me1Gc	dAmidNeu2Me1Pr	HydroKDN1Me2Ac	dAmidKDN2MeSer	dAmidKDN1MeThr	HydroKDN2Me1Ac1Fo
	20	28	4	11	0	0	500.175	8	OxyNeuThr	OxyNeu1MeSer	HydroNeu1Am1Gc	HydroNeu1FoAla	HydroNeu1AcGly	HydroPse1Pr1Fo	HydroKDN1AmGly	HydroNeu1Me1FoGly
	20	30	5	8	0	1	500.182	1	dOxyPse2Me1Am1SO4
	21	32	4	10	0	0	500.212	12	RedNeuPro	HydroNeuVal	RedPse1Hb1Fo	RedPse1Ac1Lt	HydroNeu2MeAla	HydroNeu3MeGly	HydroPse2Me1Pr	RedNeu1Me1Ac1Am	RedNeu2Me1Fo1Am	RedPse1Me1Fo1Lt	RedPse1Me1Ac1Gc	RedPse2Me1Fo1Gc
	20	32	6	9	0	0	500.223	1	RedPseAsn
	24	32	6	6	0	0	500.238	1	dHydroPse1Me1AmPro
	22	36	4	9	0	0	500.248	2	RedPse2Me1Hb	RedPse3Me1Lt
	19	22	2	12	1	0	501.091	2	dHydroKDN1Me1Ac1PO4	dHydroKDN2Me1Fo1PO4
	18	22	4	11	1	0	501.102	1	dHydroNeu1PO4Gly
	20	23	1	14	0	0	501.112	1	dAmidKDN1Pr1Fo
	19	25	4	10	0	1	501.129	4	dHydroPse1Lt1SO4	dOxyPse1Ac1Fo1SO4	dHydroNeu1Me1Am1SO4	dHydroPse1Me1Gc1SO4
	19	26	4	10	1	0	501.139	6	Pse1Me1Ac1PO4	Pse2Me1Fo1PO4	dOxyPse1Lt1PO4	dOxyNeu1Me1Am1PO4	dOxyPse1Me1Gc1PO4	dAmidPse1Me1Am1PO4
	20	27	3	10	0	1	501.142	2	KDN1MeCys	dAmidNeu1MeCys
	21	27	1	13	0	0	501.148	1	dAmidKDN2Me1Pr
	18	26	6	9	1	0	501.15	1	AmidPse1PO4Gly
	20	27	3	12	0	0	501.159	10	OxyKDNThr	OxyNeu1Me1Pr	OxyKDN1MeSer	HydroNeu1Fo1Lt	HydroNeu1Ac1Gc	HydroKDN1Am1Gc	HydroKDN1FoAla	HydroKDN1AcGly	HydroNeu1Me1Fo1Gc	HydroKDN1Me1FoGly
	20	29	4	9	0	1	501.166	1	dOxyPse2Me1Ac1SO4
	19	29	6	8	0	1	501.177	1	AmidPse1Me1Am1SO4
	23	27	5	8	0	0	501.186	1	dHydroPse2Ac1Fo1Am
	20	31	5	8	0	1	501.189	1	HydroPse1MeCys
	21	31	3	11	0	0	501.196	11	RedKDNPro	HydroKDNVal	RedNeu1Me2Ac	HydroNeu1Me1Hb	HydroNeu2Me1Lt	HydroNeu3Me1Gc	HydroKDN2MeAla	HydroKDN3MeGly	RedNeu2Me1Ac1Fo	RedKDN1Me1Ac1Am	RedKDN2Me1Fo1Am
	20	31	5	10	0	0	501.207	4	RedPseAsp	RedNeu1AmGly	RedPse1GcGly	RedPse1FoSer
	24	31	5	7	0	0	501.222	2	dHydroPse1Me1AcPro	dHydroPse2Me1FoPro
	23	31	7	6	0	0	501.234	1	dOxyPse1MeHis
	21	35	5	9	0	0	501.243	2	RedPse2MeSer	RedPse1MeThr
	18	21	3	12	1	0	502.086	2	dHydroNeu1Gc1PO4	dHydroKDN1PO4Gly
	19	24	3	11	0	1	502.113	3	dHydroNeu1Me1Ac1SO4	dHydroNeu2Me1Fo1SO4	dHydroKDN1Me1Am1SO4
	19	25	3	11	1	0	502.123	5	dOxyNeu1Me1Ac1PO4	dOxyNeu2Me1Fo1PO4	dOxyKDN1Me1Am1PO4	dAmidPse1Me1Ac1PO4	dAmidPse2Me1Fo1PO4
	20	26	2	11	0	1	502.126	1	dAmidKDN1MeCys
	18	25	5	10	1	0	502.134	4	Pse1PO4Gly	OxyPse1Am1PO4	AmidNeu1Am1PO4	AmidPse1Gc1PO4
	19	26	4	10	0	1	502.137	1	OxyNeuCys
	20	26	2	13	0	0	502.144	4	OxyKDN1Me1Pr	HydroKDN1Fo1Lt	HydroKDN1Ac1Gc	HydroKDN1Me1Fo1Gc
	19	28	5	9	0	1	502.161	5	Pse1Me1Am1SO4	dOxyPse1SO4Ala	AmidPse1Me1Ac1SO4	AmidPse2Me1Fo1SO4	dOxyPse1Me1SO4Gly
	23	26	4	9	0	0	502.17	1	dHydroPse3Ac1Fo
	21	30	2	12	0	0	502.18	5	RedKDN1Me2Ac	HydroKDN1Me1Hb	HydroKDN2Me1Lt	HydroKDN3Me1Gc	RedKDN2Me1Ac1Fo
	22	26	6	8	0	0	502.181	1	dHydroNeuHis
	20	30	4	11	0	0	502.191	8	HydroNeuThr	RedNeu1Am1Gc	RedNeu1FoAla	RedNeu1AcGly	RedPse1Pr1Fo	RedKDN1AmGly	HydroNeu1MeSer	RedNeu1Me1FoGly
	23	30	6	7	0	0	502.218	4	dHydroPse1Ac1AmAla	dHydroPse1Me1Fo1AmAla	dHydroPse1Me1Ac1AmGly	dHydroPse2Me1Fo1AmGly
	21	34	4	10	0	0	502.228	4	RedNeuVal	RedNeu2MeAla	RedNeu3MeGly	RedPse2Me1Pr
	22	30	8	6	0	0	502.229	1	AmidPseHis
	24	34	6	6	0	0	502.254	4	dHydroPse1AmLeu	dOxyPse1Me1AmPro	dHydroPse3Me1AmAla	dHydroPse1Me1AmVal
	18	20	2	13	1	0	503.07	1	dHydroKDN1Gc1PO4
	19	23	2	12	0	1	503.097	2	dHydroKDN1Me1Ac1SO4	dHydroKDN2Me1Fo1SO4
	19	24	2	12	1	0	503.107	2	dOxyKDN1Me1Ac1PO4	dOxyKDN2Me1Fo1PO4
	18	23	4	11	0	1	503.108	1	dHydroNeu1SO4Gly
	18	24	4	11	1	0	503.118	9	Neu1Am1PO4	Pse1Gc1PO4	OxyPse1Ac1PO4	AmidNeu1Ac1PO4	dOxyNeu1PO4Gly	AmidKDN1Am1PO4	dAmidPse1PO4Gly	OxyPse1Me1Fo1PO4	AmidNeu1Me1Fo1PO4
	19	25	3	11	0	1	503.121	1	OxyKDNCys
	19	27	4	10	0	1	503.145	6	Pse1Me1Ac1SO4	Pse2Me1Fo1SO4	dOxyPse1Lt1SO4	dOxyNeu1Me1Am1SO4	dOxyPse1Me1Gc1SO4	dAmidPse1Me1Am1SO4
	19	28	4	10	1	0	503.154	2	OxyPse3Me1PO4	AmidNeu3Me1PO4
	18	27	6	9	0	1	503.156	1	AmidPse1SO4Gly
	22	25	5	9	0	0	503.165	1	dHydroKDNHis
	20	29	3	12	0	0	503.175	10	HydroKDNThr	RedNeu1Fo1Lt	RedNeu1Ac1Gc	RedKDN1Am1Gc	RedKDN1FoAla	RedKDN1AcGly	HydroNeu1Me1Pr	HydroKDN1MeSer	RedNeu1Me1Fo1Gc	RedKDN1Me1FoGly
	23	29	5	8	0	0	503.202	11	dHydroNeu1AmPro	dHydroPse2AcAla	dHydroPse1GcPro	dOxyPse2Ac1Fo1Am	dHydroPse1Hb1Fo1Am	dHydroPse1Ac1Am1Lt	dHydroPse1Me2AcGly	dHydroPse1Me1Fo1Am1Lt	dHydroPse1Me1Ac1Am1Gc	dHydroPse1Me1Ac1FoAla	dHydroPse2Me1Ac1FoGly
	20	33	5	8	0	1	503.205	1	RedPse1MeCys
	21	33	3	11	0	0	503.212	6	RedKDNVal	RedNeu1Me1Hb	RedNeu2Me1Lt	RedNeu3Me1Gc	RedKDN2MeAla	RedKDN3MeGly
	22	29	7	7	0	0	503.213	2	PseHis	dHydroPse1AmAsn
	24	33	5	7	0	0	503.238	8	dHydroPse1AcLeu	dOxyPse1Me1AcPro	dOxyPse2Me1FoPro	dHydroPse2Me1Hb1Am	dHydroPse3Me1AcAla	dHydroPse1Me1FoLeu	dHydroPse1Me1AcVal	dHydroPse2Me1FoVal
	23	33	7	6	0	0	503.249	1	AmidPse1AmPro
	25	37	5	6	0	0	503.274	1	dHydroPse3MeLeu
	18	22	3	12	0	1	504.092	2	dHydroNeu1Gc1SO4	dHydroKDN1SO4Gly
	18	23	3	12	1	0	504.102	9	Neu1Ac1PO4	KDN1Am1PO4	Neu1Me1Fo1PO4	dOxyNeu1Gc1PO4	AmidKDN1Ac1PO4	dOxyKDN1PO4Gly	dAmidNeu1Am1PO4	dAmidPse1Gc1PO4	AmidKDN1Me1Fo1PO4
	19	26	3	11	0	1	504.129	5	dOxyNeu1Me1Ac1SO4	dOxyNeu2Me1Fo1SO4	dOxyKDN1Me1Am1SO4	dAmidPse1Me1Ac1SO4	dAmidPse2Me1Fo1SO4
	19	27	3	11	1	0	504.138	2	Neu3Me1PO4	AmidKDN3Me1PO4
	18	26	5	10	0	1	504.14	4	Pse1SO4Gly	OxyPse1Am1SO4	AmidNeu1Am1SO4	AmidPse1Gc1SO4
	18	27	5	10	1	0	504.15	1	HydroPse1Am1PO4
	19	28	4	10	0	1	504.153	1	HydroNeuCys
	20	28	2	13	0	0	504.159	4	RedKDN1Fo1Lt	RedKDN1Ac1Gc	HydroKDN1Me1Pr	RedKDN1Me1Fo1Gc
	23	28	4	9	0	0	504.186	9	dOxyPse3Ac1Fo	dHydroNeu1AcPro	dHydroPse2Ac1Lt	dHydroKDN1AmPro	dHydroNeu1Me2Ac1Am	dHydroNeu1Me1FoPro	dHydroPse1Ac1Hb1Fo	dHydroPse1Me2Ac1Gc	dHydroPse1Me1Ac1Fo1Lt
	21	32	2	12	0	0	504.195	3	RedKDN1Me1Hb	RedKDN2Me1Lt	RedKDN3Me1Gc
	22	28	6	8	0	0	504.197	8	dOxyNeuHis	dAmidPseHis	dHydroPse1AcAsn	dHydroPse1AmAsp	dHydroPse1FoGln	dHydroPse1Me1FoAsn	dHydroPse1Am1GcGly	dHydroPse1Fo1AmSer
	20	32	4	11	0	0	504.207	2	RedNeuThr	RedNeu1MeSer
	24	32	4	8	0	0	504.222	2	dHydroNeu3MePro	dHydroPse2Me1Ac1Hb
	23	32	6	7	0	0	504.233	13	Pse1AmPro	AmidPse1AcPro	dHydroPse3MeAsn	dHydroPse2MeGln	dHydroPse1FoLys	AmidPse1Me2Ac1Am	dOxyPse1Ac1AmAla	AmidPse1Me1FoPro	dHydroPse2Me1AmSer	dHydroPse1Me1AmThr	dOxyPse1Me1Fo1AmAla	dOxyPse1Me1Ac1AmGly	dOxyPse2Me1Fo1AmGly
	22	32	8	6	0	0	504.245	1	dHydroPseArg
	24	36	6	6	0	0	504.27	5	dOxyPse1AmLeu	AmidPse3MePro	dHydroPse2MeLys	dOxyPse3Me1AmAla	dOxyPse1Me1AmVal
	18	21	2	13	0	1	505.076	1	dHydroKDN1Gc1SO4
	18	22	2	13	1	0	505.086	6	KDN1Ac1PO4	KDN1Me1Fo1PO4	dOxyKDN1Gc1PO4	dAmidNeu1Ac1PO4	dAmidKDN1Am1PO4	dAmidNeu1Me1Fo1PO4
	19	25	2	12	0	1	505.113	2	dOxyKDN1Me1Ac1SO4	dOxyKDN2Me1Fo1SO4
	19	26	2	12	1	0	505.122	2	KDN3Me1PO4	dAmidNeu3Me1PO4
	18	25	4	11	0	1	505.124	9	Neu1Am1SO4	Pse1Gc1SO4	OxyPse1Ac1SO4	AmidNeu1Ac1SO4	dOxyNeu1SO4Gly	AmidKDN1Am1SO4	dAmidPse1SO4Gly	OxyPse1Me1Fo1SO4	AmidNeu1Me1Fo1SO4
	18	26	4	11	1	0	505.134	2	HydroPse1Ac1PO4	HydroPse1Me1Fo1PO4
	19	27	3	11	0	1	505.137	1	HydroKDNCys
	19	29	4	10	0	1	505.16	2	OxyPse3Me1SO4	AmidNeu3Me1SO4
	23	27	3	10	0	0	505.17	4	dHydroNeu1Me3Ac	dHydroKDN1AcPro	dHydroKDN1Me2Ac1Am	dHydroKDN1Me1FoPro
	19	30	4	10	1	0	505.17	1	HydroPse3Me1PO4
	22	27	5	9	0	0	505.181	13	dOxyKDNHis	dHydroPse1AcAsp	dHydroPse1FoGlu	dHydroNeu1Fo1AmAla	dHydroNeu1Ac1AmGly	dHydroPse1Pr1Fo1Am	dHydroPse1Fo1GcAla	dHydroPse1Me1FoAsp	dHydroPse1Fo1LtGly	dHydroPse1Ac1GcGly	dHydroPse1Ac1FoSer	dHydroNeu1Me1Fo1AmGly	dHydroPse1Me1Fo1GcGly
	20	31	3	12	0	0	505.191	3	RedKDNThr	RedNeu1Me1Pr	RedKDN1MeSer
	24	31	3	9	0	0	505.206	1	dHydroKDN3MePro
	23	31	5	8	0	0	505.217	32	Pse1AcPro	Pse1Me2Ac1Am	Pse1Me1FoPro	dOxyNeu1AmPro	AmidPse1Me3Ac	dOxyPse2AcAla	dOxyPse1GcPro	dAmidPse1AmPro	dHydroNeu1AmVal	dHydroPse1HbAla	dHydroPse3MeAsp	dHydroPse2MeGlu	dHydroPse1GcVal	dOxyPse1Hb1Fo1Am	dOxyPse1Ac1Am1Lt	dOxyPse1Me2AcGly	dHydroNeu2Me1AmAla	dHydroNeu3Me1AmGly	dHydroPse2Me1Pr1Am	dHydroPse1Me1LtAla	dHydroPse2Me1GcAla	dHydroPse1Me1HbGly	dHydroPse2Me1LtGly	dHydroPse3Me1GcGly	dHydroPse2Me1AcSer	dHydroPse3Me1FoSer	dHydroPse1Me1AcThr	dHydroPse2Me1FoThr	dOxyPse1Me1Fo1Am1Lt	dOxyPse1Me1Ac1Am1Gc	dOxyPse1Me1Ac1FoAla	dOxyPse2Me1Ac1FoGly
	22	31	7	7	0	0	505.228	4	dOxyPse1AmAsn	AmidPse1Fo1AmAla	AmidPse1Ac1AmGly	AmidPse1Me1Fo1AmGly
	24	35	5	7	0	0	505.254	7	Pse3MePro	dOxyPse1AcLeu	dOxyPse2Me1Hb1Am	dOxyPse3Me1AcAla	dOxyPse1Me1FoLeu	dOxyPse1Me1AcVal	dOxyPse2Me1FoVal
	23	35	7	6	0	0	505.265	3	AmidPse1AmVal	AmidPse2Me1AmAla	AmidPse3Me1AmGly
	25	39	5	6	0	0	505.29	1	dOxyPse3MeLeu
	18	21	1	14	1	0	506.07	2	dAmidKDN1Ac1PO4	dAmidKDN1Me1Fo1PO4
	17	21	3	13	1	0	506.081	1	OxyNeu1Fo1PO4
	19	25	1	13	1	0	506.106	1	dAmidKDN3Me1PO4
	18	24	3	12	0	1	506.108	9	Neu1Ac1SO4	KDN1Am1SO4	Neu1Me1Fo1SO4	dOxyNeu1Gc1SO4	AmidKDN1Ac1SO4	dOxyKDN1SO4Gly	dAmidNeu1Am1SO4	dAmidPse1Gc1SO4	AmidKDN1Me1Fo1SO4
	18	25	3	12	1	0	506.118	1	OxyNeu2Me1PO4
	19	28	3	11	0	1	506.144	2	Neu3Me1SO4	AmidKDN3Me1SO4
	23	26	2	11	0	0	506.154	1	dHydroKDN1Me3Ac
	18	28	5	10	0	1	506.156	1	HydroPse1Am1SO4
	22	26	4	10	0	0	506.165	11	dHydroNeu2AcGly	dHydroNeu1Fo1Am1Lt	dHydroNeu1Ac1Am1Gc	dHydroNeu1Ac1FoAla	dHydroPse1Fo1Gc1Lt	dHydroPse1Ac1Pr1Fo	dHydroKDN1Fo1AmAla	dHydroKDN1Ac1AmGly	dHydroNeu1Me1Fo1Am1Gc	dHydroNeu1Me1Ac1FoGly	dHydroKDN1Me1Fo1AmGly
	18	29	5	10	1	0	506.165	1	RedPse1Am1PO4
	19	30	4	10	0	1	506.168	1	RedNeuCys
	20	30	2	13	0	0	506.175	1	RedKDN1Me1Pr
	22	30	6	6	0	1	506.195	1	dHydroPse1Me1AmCys
	23	30	4	9	0	0	506.201	27	Pse1Me3Ac	dOxyNeu1AcPro	dOxyPse2Ac1Lt	dOxyKDN1AmPro	dAmidPse1AcPro	dHydroNeu1FoLeu	dHydroNeu1AcVal	dHydroPse1Hb1Lt	dHydroKDN1AmVal	dOxyNeu1Me2Ac1Am	dOxyNeu1Me1FoPro	dOxyPse1Ac1Hb1Fo	dOxyPse1Me2Ac1Gc	dAmidPse1Me2Ac1Am	dAmidPse1Me1FoPro	dHydroNeu1Me1Hb1Am	dHydroNeu2Me1Am1Lt	dHydroNeu2Me1AcAla	dHydroNeu3Me1FoAla	dHydroNeu3Me1AcGly	dHydroNeu1Me1FoVal	dHydroPse1Me1Hb1Gc	dHydroPse2Me1Gc1Lt	dHydroPse2Me1Ac1Pr	dHydroKDN2Me1AmAla	dHydroKDN3Me1AmGly	dOxyPse1Me1Ac1Fo1Lt
	22	30	6	8	0	0	506.212	15	Pse1Fo1AmAla	Pse1Ac1AmGly	dOxyPse1AcAsn	dOxyPse1AmAsp	dOxyPse1FoGln	AmidPse2AcGly	Pse1Me1Fo1AmGly	AmidPse1Fo1Am1Lt	AmidPse1Ac1Am1Gc	AmidPse1Ac1FoAla	dOxyPse1Me1FoAsn	dOxyPse1Am1GcGly	dOxyPse1Fo1AmSer	AmidPse1Me1Fo1Am1Gc	AmidPse1Me1Ac1FoGly
	24	34	4	8	0	0	506.238	5	dOxyNeu3MePro	dAmidPse3MePro	dHydroNeu2MeLeu	dHydroNeu3MeVal	dOxyPse2Me1Ac1Hb
	23	34	6	7	0	0	506.249	16	Pse1AmVal	Pse2Me1AmAla	Pse3Me1AmGly	dOxyPse3MeAsn	dOxyPse2MeGln	AmidPse1FoLeu	dOxyPse1FoLys	AmidPse1AcVal	AmidPse1Me1Hb1Am	AmidPse2Me1Am1Lt	AmidPse2Me1AcAla	AmidPse3Me1FoAla	AmidPse3Me1AcGly	dOxyPse2Me1AmSer	dOxyPse1Me1AmThr	AmidPse1Me1FoVal
	22	34	8	6	0	0	506.26	1	dOxyPseArg
	24	38	6	6	0	0	506.285	3	AmidPse2MeLeu	dOxyPse2MeLys	AmidPse3MeVal
	17	20	2	14	1	0	507.065	1	OxyKDN1Fo1PO4
	18	23	2	13	0	1	507.092	6	KDN1Ac1SO4	KDN1Me1Fo1SO4	dOxyKDN1Gc1SO4	dAmidNeu1Ac1SO4	dAmidKDN1Am1SO4	dAmidNeu1Me1Fo1SO4
	18	24	2	13	1	0	507.102	1	OxyKDN2Me1PO4
	19	27	2	12	0	1	507.128	2	KDN3Me1SO4	dAmidNeu3Me1SO4
	18	27	4	11	0	1	507.14	2	HydroPse1Ac1SO4	HydroPse1Me1Fo1SO4
	22	25	3	11	0	0	507.149	9	dHydroNeu2Ac1Gc	dHydroKDN2AcGly	dHydroNeu1Ac1Fo1Lt	dHydroKDN1Fo1Am1Lt	dHydroKDN1Ac1Am1Gc	dHydroKDN1Ac1FoAla	dHydroNeu1Me1Ac1Fo1Gc	dHydroKDN1Me1Fo1Am1Gc	dHydroKDN1Me1Ac1FoGly
	18	28	4	11	1	0	507.149	2	RedPse1Ac1PO4	RedPse1Me1Fo1PO4
	19	29	3	11	0	1	507.152	1	RedKDNCys
	21	25	5	10	0	0	507.16	1	dHydroNeu1FoAsn
	19	31	4	10	0	1	507.176	1	HydroPse3Me1SO4
	22	29	5	7	0	1	507.179	3	dHydroPse1FoMet	dHydroPse1Me1AcCys	dHydroPse2Me1FoCys
	23	29	3	10	0	0	507.185	16	dOxyNeu1Me3Ac	dOxyKDN1AcPro	dAmidPse1Me3Ac	dHydroKDN1FoLeu	dHydroKDN1AcVal	dOxyKDN1Me2Ac1Am	dOxyKDN1Me1FoPro	dHydroNeu1Me1Ac1Hb	dHydroNeu2Me1Hb1Fo	dHydroNeu2Me1Ac1Lt	dHydroKDN1Me1Hb1Am	dHydroKDN2Me1Am1Lt	dHydroKDN2Me1AcAla	dHydroKDN3Me1FoAla	dHydroKDN3Me1AcGly	dHydroKDN1Me1FoVal
	19	32	4	10	1	0	507.186	1	RedPse3Me1PO4
	22	29	5	9	0	0	507.197	39	Pse2AcGly	Pse1Fo1Am1Lt	Pse1Ac1Am1Gc	OxyPse2Ac1Am	Pse1Ac1FoAla	OxyPse1FoPro	AmidNeu2Ac1Am	AmidNeu1FoPro	AmidPse2Ac1Gc	dOxyPse1AcAsp	dOxyPse1FoGlu	dHydroNeu2MeAsn	dHydroNeu1MeGln	dHydroNeu1AmThr	Pse1Me1Fo1Am1Gc	dHydroPse1PrAla	Pse1Me1Ac1FoGly	dHydroPse1LtSer	dHydroPse1GcThr	dOxyNeu1Fo1AmAla	dOxyNeu1Ac1AmGly	AmidPse1Ac1Fo1Lt	dOxyPse1Pr1Fo1Am	dOxyPse1Fo1GcAla	dOxyPse1Me1FoAsp	dOxyPse1Fo1LtGly	dOxyPse1Ac1GcGly	dOxyPse1Ac1FoSer	dAmidPse1Fo1AmAla	dAmidPse1Ac1AmGly	dHydroNeu1Me1AmSer	OxyPse1Me1Ac1Fo1Am	dHydroPse1Me1PrGly	dHydroPse1Me1GcSer	AmidNeu1Me1Ac1Fo1Am	dOxyNeu1Me1Fo1AmGly	AmidPse1Me1Ac1Fo1Gc	dOxyPse1Me1Fo1GcGly	dAmidPse1Me1Fo1AmGly
	21	29	7	8	0	0	507.208	1	AmidPse1FoAsn
	23	33	5	6	0	1	507.215	1	dHydroPse2MeMet
	24	33	3	9	0	0	507.222	3	dOxyKDN3MePro	dHydroKDN2MeLeu	dHydroKDN3MeVal
	23	33	5	8	0	0	507.233	34	Pse1FoLeu	Pse1AcVal	Pse1Me1Hb1Am	Pse2Me1Am1Lt	Pse2Me1AcAla	Pse3Me1FoAla	Pse3Me1AcGly	OxyPse2MePro	Pse1Me1FoVal	AmidNeu2MePro	dOxyNeu1AmVal	dOxyPse1HbAla	dOxyPse3MeAsp	dOxyPse2MeGlu	dOxyPse1GcVal	dAmidPse1AmVal	dHydroNeu1MeLys	dOxyNeu2Me1AmAla	dOxyNeu3Me1AmGly	AmidPse1Me1Ac1Hb	AmidPse2Me1Hb1Fo	AmidPse2Me1Ac1Lt	dOxyPse2Me1Pr1Am	dOxyPse1Me1LtAla	dOxyPse2Me1GcAla	dOxyPse1Me1HbGly	dOxyPse2Me1LtGly	dOxyPse3Me1GcGly	dOxyPse2Me1AcSer	dOxyPse3Me1FoSer	dOxyPse1Me1AcThr	dOxyPse2Me1FoThr	dAmidPse2Me1AmAla	dAmidPse3Me1AmGly
	22	33	7	7	0	0	507.244	4	AmidPse2MeAsn	AmidPse1MeGln	AmidPse1AmThr	AmidPse1Me1AmSer
	24	37	5	7	0	0	507.269	2	Pse2MeLeu	Pse3MeVal
	23	37	7	6	0	0	507.281	1	AmidPse1MeLys
	16	21	4	11	1	1	508.067	1	dHydroPse1PO41SO4
	18	22	1	14	0	1	508.076	2	dAmidKDN1Ac1SO4	dAmidKDN1Me1Fo1SO4
	17	22	3	13	0	1	508.087	1	OxyNeu1Fo1SO4
	17	23	3	13	1	0	508.097	1	HydroNeu1Fo1PO4
	19	26	1	13	0	1	508.113	1	dAmidKDN3Me1SO4
	18	26	3	12	0	1	508.124	1	OxyNeu2Me1SO4
	22	24	2	12	0	0	508.133	3	dHydroKDN2Ac1Gc	dHydroKDN1Ac1Fo1Lt	dHydroKDN1Me1Ac1Fo1Gc
	18	27	3	12	1	0	508.133	1	HydroNeu2Me1PO4
	21	24	4	11	0	0	508.144	3	dHydroNeu1FoAsp	dHydroKDN1FoAsn	dHydroNeu1Fo1GcGly
	23	28	2	11	0	0	508.169	4	dOxyKDN1Me3Ac	dHydroKDN1Me1Ac1Hb	dHydroKDN2Me1Hb1Fo	dHydroKDN2Me1Ac1Lt
	18	30	5	10	0	1	508.171	1	RedPse1Am1SO4
	22	28	4	10	0	0	508.18	49	Neu2Ac1Am	Neu1FoPro	Pse2Ac1Gc	OxyPse3Ac	AmidNeu3Ac	Pse1Ac1Fo1Lt	dOxyNeu2AcGly	AmidKDN2Ac1Am	AmidKDN1FoPro	dAmidPse2AcGly	Neu1Me1Ac1Fo1Am	dHydroNeu1LtAla	dHydroNeu2MeAsp	dHydroNeu1MeGlu	dHydroNeu1HbGly	dHydroNeu1AcThr	Pse1Me1Ac1Fo1Gc	dHydroPse1Pr1Lt	OxyPse1Me2Ac1Fo	dHydroPse1FoXyl	dHydroKDN2MeAsn	dHydroKDN1MeGln	dHydroKDN1AmThr	AmidNeu1Me2Ac1Fo	dOxyNeu1Fo1Am1Lt	dOxyNeu1Ac1Am1Gc	dOxyNeu1Ac1FoAla	dOxyPse1Fo1Gc1Lt	dOxyPse1Ac1Pr1Fo	dOxyKDN1Fo1AmAla	dOxyKDN1Ac1AmGly	dAmidPse1Fo1Am1Lt	dAmidPse1Ac1Am1Gc	dAmidPse1Ac1FoAla	dHydroNeu1Me1Pr1Am	dHydroNeu1Me1GcAla	dHydroNeu1Me1LtGly	dHydroNeu2Me1GcGly	dHydroNeu1Me1AcSer	dHydroNeu2Me1FoSer	dHydroNeu1Me1FoThr
	21	28	6	9	0	0	508.192	5	Pse1FoAsn	AmidPse1FoAsp	OxyPse1Fo1AmGly	AmidNeu1Fo1AmGly	AmidPse1Fo1GcGly
	22	32	6	6	0	1	508.21	1	dOxyPse1Me1AmCys
	23	32	4	9	0	0	508.217	32	Neu2MePro	Pse1Me1Ac1Hb	Pse2Me1Hb1Fo	Pse2Me1Ac1Lt	dOxyNeu1FoLeu	dOxyNeu1AcVal	dOxyPse1Hb1Lt	AmidKDN2MePro	dOxyKDN1AmVal	dAmidPse1FoLeu	dAmidPse1AcVal	dHydroNeu3MeThr	dHydroPse2MeXyl	dHydroPse1MeFuc	dHydroKDN1MeLys	dOxyNeu1Me1Hb1Am	dOxyNeu2Me1Am1Lt	dOxyNeu2Me1AcAla	dOxyNeu3Me1FoAla	dOxyNeu3Me1AcGly	dOxyNeu1Me1FoVal	dOxyPse1Me1Hb1Gc	dOxyPse2Me1Gc1Lt	dOxyPse2Me1Ac1Pr	dOxyKDN2Me1AmAla	dOxyKDN3Me1AmGly	dAmidPse1Me1Hb1Am	dAmidPse2Me1Am1Lt	dAmidPse2Me1AcAla	dAmidPse3Me1FoAla	dAmidPse3Me1AcGly	dAmidPse1Me1FoVal
	22	32	6	8	0	0	508.228	20	Pse2MeAsn	Pse1MeGln	Pse1AmThr	Pse1Me1AmSer	AmidPse1LtAla	AmidPse2MeAsp	AmidPse1MeGlu	AmidPse1HbGly	AmidPse1AcThr	OxyPse1Me1AmAla	OxyPse2Me1AmGly	AmidNeu1Me1AmAla	AmidNeu2Me1AmGly	AmidPse1Me1Pr1Am	AmidPse1Me1GcAla	AmidPse1Me1LtGly	AmidPse2Me1GcGly	AmidPse1Me1AcSer	AmidPse2Me1FoSer	AmidPse1Me1FoThr
	24	36	4	8	0	0	508.253	4	dOxyNeu2MeLeu	dOxyNeu3MeVal	dAmidPse2MeLeu	dAmidPse3MeVal
	23	36	6	7	0	0	508.264	2	Pse1MeLys	AmidPse3MeThr
	17	21	2	14	0	1	509.071	1	OxyKDN1Fo1SO4
	17	22	2	14	1	0	509.081	1	HydroKDN1Fo1PO4
	18	25	2	13	0	1	509.108	1	OxyKDN2Me1SO4
	18	26	2	13	1	0	509.117	1	HydroKDN2Me1PO4
	21	23	3	12	0	0	509.128	2	dHydroKDN1FoAsp	dHydroKDN1Fo1GcGly
	18	29	4	11	0	1	509.155	2	RedPse1Ac1SO4	RedPse1Me1Fo1SO4
	21	27	5	8	0	1	509.158	2	dHydroNeu1AmCys	dHydroPse1GcCys
	22	27	3	11	0	0	509.165	38	Neu3Ac	KDN2Ac1Am	KDN1FoPro	AmidKDN3Ac	Neu1Me2Ac1Fo	dOxyNeu2Ac1Gc	dOxyKDN2AcGly	dAmidNeu2Ac1Am	dAmidNeu1FoPro	dAmidPse2Ac1Gc	dHydroNeu1Hb1Gc	KDN1Me1Ac1Fo1Am	dHydroKDN1LtAla	dHydroKDN2MeAsp	dHydroKDN1MeGlu	dHydroKDN1HbGly	dHydroKDN1AcThr	dOxyNeu1Ac1Fo1Lt	AmidKDN1Me2Ac1Fo	dOxyKDN1Fo1Am1Lt	dOxyKDN1Ac1Am1Gc	dOxyKDN1Ac1FoAla	dAmidPse1Ac1Fo1Lt	dHydroNeu1Me1Gc1Lt	dHydroNeu1Me1Ac1Pr	dHydroNeu2Me1Pr1Fo	dHydroKDN1Me1Pr1Am	dHydroKDN1Me1GcAla	dHydroKDN1Me1LtGly	dHydroKDN2Me1GcGly	dHydroKDN1Me1AcSer	dHydroKDN2Me1FoSer	dHydroKDN1Me1FoThr	dOxyNeu1Me1Ac1Fo1Gc	dOxyKDN1Me1Fo1Am1Gc	dOxyKDN1Me1Ac1FoGly	dAmidNeu1Me1Ac1Fo1Am	dAmidPse1Me1Ac1Fo1Gc
	21	27	5	10	0	0	509.176	10	Pse1FoAsp	Neu1Fo1AmGly	Pse1Fo1GcGly	dOxyNeu1FoAsn	dAmidPse1FoAsn	OxyPse1Fo1Am1Gc	OxyPse1Ac1FoGly	AmidNeu1Fo1Am1Gc	AmidNeu1Ac1FoGly	AmidKDN1Fo1AmGly
	19	33	4	10	0	1	509.192	1	RedPse3Me1SO4
	22	31	5	7	0	1	509.194	3	dOxyPse1FoMet	dOxyPse1Me1AcCys	dOxyPse2Me1FoCys
	23	31	3	10	0	0	509.201	17	KDN2MePro	dOxyKDN1FoLeu	dOxyKDN1AcVal	dAmidNeu2MePro	dHydroKDN3MeThr	dOxyNeu1Me1Ac1Hb	dOxyNeu2Me1Hb1Fo	dOxyNeu2Me1Ac1Lt	dOxyKDN1Me1Hb1Am	dOxyKDN2Me1Am1Lt	dOxyKDN2Me1AcAla	dOxyKDN3Me1FoAla	dOxyKDN3Me1AcGly	dOxyKDN1Me1FoVal	dAmidPse1Me1Ac1Hb	dAmidPse2Me1Hb1Fo	dAmidPse2Me1Ac1Lt
	21	31	7	6	0	1	509.206	1	AmidPse1AmCys
	22	31	5	9	0	0	509.212	53	Pse1LtAla	Pse2MeAsp	Pse1MeGlu	Pse1HbGly	Pse1AcThr	Neu1Me1AmAla	Neu2Me1AmGly	Pse1Me1Pr1Am	OxyPse1Hb1Am	Pse1Me1GcAla	Pse1Me1LtGly	Pse2Me1GcGly	Pse1Me1AcSer	Pse2Me1FoSer	Pse1Me1FoThr	OxyPse1FoVal	AmidNeu1Hb1Am	dOxyNeu2MeAsn	dOxyNeu1MeGln	dOxyNeu1AmThr	AmidNeu1FoVal	AmidPse1Hb1Gc	dHydroPseHexN	dOxyPse1PrAla	dOxyPse1LtSer	dOxyPse1GcThr	HydroPse2Ac1Am	dAmidPse2MeAsn	dAmidPse1MeGln	HydroPse1FoPro	dAmidPse1AmThr	OxyPse1Me1Am1Lt	OxyPse2Me1Am1Gc	OxyPse1Me1AcAla	OxyPse2Me1FoAla	OxyPse2Me1AcGly	OxyPse3Me1FoGly	AmidNeu1Me1Am1Lt	AmidNeu2Me1Am1Gc	AmidNeu1Me1AcAla	AmidNeu2Me1FoAla
	26	31	5	6	0	0	509.227	1	dHydroPse1MePhe
	23	35	5	6	0	1	509.231	1	dOxyPse2MeMet
	24	35	3	9	0	0	509.237	2	dOxyKDN2MeLeu	dOxyKDN3MeVal
	23	35	5	8	0	0	509.249	8	Pse3MeThr	OxyPse1MeLeu	OxyPse2MeVal	AmidNeu1MeLeu	dOxyNeu1MeLys	AmidNeu2MeVal	dAmidPse1MeLys	HydroPse2MePro
	16	23	4	11	1	1	510.082	1	dOxyPse1PO41SO4
	17	24	3	13	0	1	510.103	1	HydroNeu1Fo1SO4
	17	25	3	13	1	0	510.113	1	RedNeu1Fo1PO4
	20	25	5	9	1	0	510.139	2	dHydroPse1Ac1Am1PO4	dHydroPse1Me1Fo1Am1PO4
	18	28	3	12	0	1	510.139	1	HydroNeu2Me1SO4
	21	26	4	9	0	1	510.142	3	dHydroNeu1AcCys	dHydroKDN1AmCys	dHydroNeu1Me1FoCys
	22	26	2	12	0	0	510.149	14	KDN3Ac	dAmidNeu3Ac	KDN1Me2Ac1Fo	dOxyKDN2Ac1Gc	dAmidKDN2Ac1Am	dAmidKDN1FoPro	dHydroKDN1Hb1Gc	dOxyKDN1Ac1Fo1Lt	dAmidNeu1Me2Ac1Fo	dHydroKDN1Me1Gc1Lt	dHydroKDN1Me1Ac1Pr	dHydroKDN2Me1Pr1Fo	dOxyKDN1Me1Ac1Fo1Gc	dAmidKDN1Me1Ac1Fo1Am
	18	29	3	12	1	0	510.149	1	RedNeu2Me1PO4
	21	26	4	11	0	0	510.16	16	Neu1Fo1Am1Gc	Neu1Ac1FoGly	KDN1Fo1AmGly	dOxyNeu1FoAsp	dOxyKDN1FoAsn	dAmidPse1FoAsp	OxyNeu1Ac1Fo1Am	dHydroNeu1PrGly	dHydroNeu1GcSer	OxyPse1Ac1Fo1Gc	AmidNeu1Ac1Fo1Gc	dOxyNeu1Fo1GcGly	AmidKDN1Fo1Am1Gc	AmidKDN1Ac1FoGly	dAmidNeu1Fo1AmGly	dAmidPse1Fo1GcGly
	22	30	4	8	0	1	510.178	2	dHydroNeu3MeCys	dHydroNeu1MeMet
	23	30	2	11	0	0	510.185	4	dAmidKDN2MePro	dOxyKDN1Me1Ac1Hb	dOxyKDN2Me1Hb1Fo	dOxyKDN2Me1Ac1Lt
	21	30	6	7	0	1	510.19	3	Pse1AmCys	AmidPse1AcCys	AmidPse1Me1FoCys
	22	30	4	10	0	0	510.196	70	Neu1Hb1Am	Neu1FoVal	Pse1Hb1Gc	HydroPse3Ac	Neu1Me1Am1Lt	Neu2Me1Am1Gc	Neu1Me1AcAla	Neu2Me1FoAla	Neu2Me1AcGly	Neu3Me1FoGly	OxyNeu1MePro	Pse1Me1Gc1Lt	Pse1Me1Ac1Pr	Pse2Me1Pr1Fo	OxyPse1Ac1Hb	dHydroPseHex	KDN1Me1AmAla	KDN2Me1AmGly	AmidNeu1Ac1Hb	dOxyNeu1LtAla	dOxyNeu2MeAsp	dOxyNeu1MeGlu	dOxyNeu1HbGly	dOxyNeu1AcThr	dOxyPse1Pr1Lt	dOxyPse1FoXyl	AmidKDN1Hb1Am	dOxyKDN2MeAsn	dOxyKDN1MeGln	dOxyKDN1AmThr	AmidKDN1FoVal	dAmidPse1LtAla	dAmidPse2MeAsp	dAmidPse1MeGlu	dAmidPse1HbGly	dAmidPse1AcThr	OxyNeu2Me1Ac1Am	OxyPse1Me1Hb1Fo	OxyPse1Me1Ac1Lt	OxyPse2Me1Fo1Lt	OxyPse2Me1Ac1Gc
	21	30	6	9	0	0	510.207	9	OxyPseGln	AmidNeuGln	OxyPse1MeAsn	OxyPse1AmSer	AmidNeu1MeAsn	AmidNeu1AmSer	AmidPse1PrGly	AmidPse1GcSer	HydroPse1Fo1AmGly
	22	34	6	6	0	1	510.226	2	AmidPse3MeCys	AmidPse1MeMet
	23	34	4	9	0	0	510.233	11	Neu1MeLeu	Neu2MeVal	OxyPse3Me1Hb	AmidNeu3Me1Hb	dOxyNeu3MeThr	dOxyPse2MeXyl	dOxyPse1MeFuc	AmidKDN1MeLeu	dOxyKDN1MeLys	AmidKDN2MeVal	dAmidPse3MeThr
	22	34	6	8	0	0	510.244	4	OxyPseLys	AmidNeuLys	HydroPse1Me1AmAla	HydroPse2Me1AmGly
	17	23	2	14	0	1	511.087	1	HydroKDN1Fo1SO4
	17	24	2	14	1	0	511.096	1	RedKDN1Fo1PO4
	20	24	4	10	1	0	511.123	2	dHydroPse2Ac1PO4	dHydroPse1Me1Ac1Fo1PO4
	18	27	2	13	0	1	511.123	1	HydroKDN2Me1SO4
	21	25	3	10	0	1	511.126	2	dHydroKDN1AcCys	dHydroKDN1Me1FoCys
	22	25	1	13	0	0	511.133	2	dAmidKDN3Ac	dAmidKDN1Me2Ac1Fo
	18	28	2	13	1	0	511.133	1	RedKDN2Me1PO4
	21	25	3	12	0	0	511.144	14	Neu1Ac1Fo1Gc	OxyNeu2Ac1Fo	KDN1Fo1Am1Gc	KDN1Ac1FoGly	dOxyKDN1FoAsp	dHydroNeu1Pr1Gc	OxyKDN1Ac1Fo1Am	dHydroKDN1PrGly	dHydroKDN1GcSer	AmidKDN1Ac1Fo1Gc	dOxyKDN1Fo1GcGly	dAmidNeu1Fo1Am1Gc	dAmidNeu1Ac1FoGly	dAmidKDN1Fo1AmGly
	22	29	3	9	0	1	511.163	2	dHydroKDN3MeCys	dHydroKDN1MeMet
	21	29	5	8	0	1	511.174	5	Pse1AcCys	Pse1Me1FoCys	dOxyNeu1AmCys	dOxyPse1GcCys	dAmidPse1AmCys
	22	29	3	11	0	0	511.18	53	Neu1Ac1Hb	KDN1Hb1Am	KDN1FoVal	Neu1Me1Hb1Fo	Neu1Me1Ac1Lt	Neu2Me1Fo1Lt	Neu2Me1Ac1Gc	OxyNeu2Me2Ac	dHydroNeuFuc	KDN1Me1Am1Lt	KDN2Me1Am1Gc	KDN1Me1AcAla	KDN2Me1FoAla	KDN2Me1AcGly	KDN3Me1FoGly	OxyKDN1MePro	dOxyNeu1Hb1Gc	AmidKDN1Ac1Hb	dOxyKDN1LtAla	dOxyKDN2MeAsp	dOxyKDN1MeGlu	dOxyKDN1HbGly	dOxyKDN1AcThr	dAmidNeu1Hb1Am	dAmidNeu1FoVal	dAmidPse1Hb1Gc	dHydroNeu1MeXyl	OxyKDN2Me1Ac1Am	dOxyNeu1Me1Gc1Lt	dOxyNeu1Me1Ac1Pr	dOxyNeu2Me1Pr1Fo	AmidKDN1Me1Hb1Fo	AmidKDN1Me1Ac1Lt	AmidKDN2Me1Fo1Lt	AmidKDN2Me1Ac1Gc	dOxyKDN1Me1Pr1Am	dOxyKDN1Me1GcAla	dOxyKDN1Me1LtGly	dOxyKDN2Me1GcGly	dOxyKDN1Me1AcSer	dOxyKDN2Me1FoSer
	21	29	5	10	0	0	511.191	31	NeuGln	Neu1MeAsn	Neu1AmSer	OxyPseGlu	Pse1PrGly	Pse1GcSer	AmidNeuGlu	AmidKDNGln	OxyNeu1AmAla	OxyPse1Pr1Am	OxyPse1GcAla	OxyPse1MeAsp	OxyPse1LtGly	OxyPse1AcSer	OxyPse1FoThr	AmidNeu1Pr1Am	AmidNeu1GcAla	AmidNeu1MeAsp	AmidNeu1LtGly	AmidNeu1AcSer	AmidNeu1FoThr	AmidPse1Pr1Gc	AmidKDN1MeAsn	AmidKDN1AmSer	OxyNeu1Me1AmGly	OxyPse1Me1GcGly	OxyPse1Me1FoSer	AmidNeu1Me1GcGly	AmidNeu1Me1FoSer	HydroPse1Fo1Am1Gc	HydroPse1Ac1FoGly
	25	29	5	7	0	0	511.207	1	dHydroPseTyr
	22	33	5	7	0	1	511.21	2	Pse3MeCys	Pse1MeMet
	23	33	3	10	0	0	511.217	7	Neu3Me1Hb	KDN1MeLeu	KDN2MeVal	AmidKDN3Me1Hb	dOxyKDN3MeThr	dAmidNeu1MeLeu	dAmidNeu2MeVal
	22	33	5	9	0	0	511.228	20	NeuLys	AmidPseFuc	AmidKDNLys	dOxyPseHexN	RedPse2Ac1Am	RedPse1FoPro	OxyPse3MeSer	OxyPse2MeThr	AmidNeu3MeSer	AmidNeu2MeThr	AmidPse1MeXyl	HydroPse1Hb1Am	HydroPse1FoVal	HydroPse1Me1Am1Lt	HydroPse2Me1Am1Gc	HydroPse1Me1AcAla	HydroPse2Me1FoAla	HydroPse2Me1AcGly	HydroPse3Me1FoGly	RedPse1Me1Ac1Fo1Am
	26	33	5	6	0	0	511.243	1	dOxyPse1MePhe
	23	37	5	8	0	0	511.264	3	RedPse2MePro	HydroPse1MeLeu	HydroPse2MeVal
	19	23	5	10	1	0	512.118	1	dHydroPse1Fo1PO4Gly
	17	26	3	13	0	1	512.119	1	RedNeu1Fo1SO4
	21	24	2	13	0	0	512.128	6	KDN1Ac1Fo1Gc	OxyKDN2Ac1Fo	dHydroKDN1Pr1Gc	dAmidNeu1Ac1Fo1Gc	dAmidKDN1Fo1Am1Gc	dAmidKDN1Ac1FoGly
	20	26	5	9	0	1	512.145	2	dHydroPse1Ac1Am1SO4	dHydroPse1Me1Fo1Am1SO4
	20	27	5	9	1	0	512.155	4	dOxyPse1Ac1Am1PO4	dHydroPse1Me1PO4Ala	dHydroPse2Me1PO4Gly	dOxyPse1Me1Fo1Am1PO4
	18	30	3	12	0	1	512.155	1	RedNeu2Me1SO4
	21	28	4	9	0	1	512.158	5	dOxyNeu1AcCys	dOxyKDN1AmCys	dAmidPse1AcCys	dOxyNeu1Me1FoCys	dAmidPse1Me1FoCys
	22	28	2	12	0	0	512.164	25	KDN1Ac1Hb	KDN1Me1Hb1Fo	KDN1Me1Ac1Lt	KDN2Me1Fo1Lt	KDN2Me1Ac1Gc	OxyKDN2Me2Ac	dHydroKDNFuc	dOxyKDN1Hb1Gc	dAmidNeu1Ac1Hb	dAmidKDN1Hb1Am	dAmidKDN1FoVal	dHydroKDN1MeXyl	dOxyKDN1Me1Gc1Lt	dOxyKDN1Me1Ac1Pr	dOxyKDN2Me1Pr1Fo	dAmidNeu1Me1Hb1Fo	dAmidNeu1Me1Ac1Lt	dAmidNeu2Me1Fo1Lt	dAmidNeu2Me1Ac1Gc	dAmidKDN1Me1Am1Lt	dAmidKDN2Me1Am1Gc	dAmidKDN1Me1AcAla	dAmidKDN2Me1FoAla	dAmidKDN2Me1AcGly	dAmidKDN3Me1FoGly
	21	28	4	11	0	0	512.176	45	NeuGlu	KDNGln	Neu1Pr1Am	Neu1GcAla	Neu1MeAsp	Neu1LtGly	Neu1AcSer	Neu1FoThr	Pse1Pr1Gc	KDN1MeAsn	KDN1AmSer	AmidKDNGlu	dAmidNeuGln	OxyNeu1Am1Lt	OxyNeu1AcAla	Neu1Me1GcGly	Neu1Me1FoSer	OxyPse1Gc1Lt	OxyPse1Ac1Pr	OxyKDN1AmAla	AmidNeu1Gc1Lt	AmidNeu1Ac1Pr	dOxyNeu1PrGly	dOxyNeu1GcSer	AmidKDN1Pr1Am	AmidKDN1GcAla	AmidKDN1MeAsp	AmidKDN1LtGly	AmidKDN1AcSer	AmidKDN1FoThr	dAmidNeu1MeAsn	dAmidNeu1AmSer	dAmidPse1PrGly	dAmidPse1GcSer	OxyNeu1Me1Am1Gc	OxyNeu1Me1FoAla	OxyNeu1Me1AcGly	OxyNeu2Me1FoGly	OxyPse1Me1Pr1Fo	OxyKDN1Me1AmGly	AmidNeu1Me1Pr1Fo
	25	28	4	8	0	0	512.191	1	dHydroNeuPhe
	22	32	4	8	0	1	512.194	4	dOxyNeu3MeCys	dOxyNeu1MeMet	dAmidPse3MeCys	dAmidPse1MeMet
	23	32	2	11	0	0	512.201	4	KDN3Me1Hb	dAmidNeu3Me1Hb	dAmidKDN1MeLeu	dAmidKDN2MeVal
	22	32	4	10	0	0	512.212	23	PseFuc	KDNLys	OxyNeuLeu	Neu3MeSer	Neu2MeThr	RedPse3Ac	Pse1MeXyl	dOxyPseHex	dAmidNeuLys	OxyNeu3MeAla	OxyNeu1MeVal	OxyPse3Me1Pr	AmidNeu3Me1Pr	AmidKDN3MeSer	AmidKDN2MeThr	HydroNeu1MePro	HydroPse1Ac1Hb	RedPse1Me2Ac1Fo	HydroNeu2Me1Ac1Am	HydroPse1Me1Hb1Fo	HydroPse1Me1Ac1Lt	HydroPse2Me1Fo1Lt	HydroPse2Me1Ac1Gc
	21	32	6	9	0	0	512.223	4	HydroPseGln	HydroPse1MeAsn	HydroPse1AmSer	RedPse1Fo1AmGly
	25	32	6	6	0	0	512.238	1	AmidPsePhe
	23	36	4	9	0	0	512.248	1	HydroPse3Me1Hb
	22	36	6	8	0	0	512.26	3	HydroPseLys	RedPse1Me1AmAla	RedPse2Me1AmGly
	19	22	4	11	1	0	513.102	2	dHydroNeu1Fo1Am1PO4	dHydroPse1Fo1Gc1PO4
	17	25	2	14	0	1	513.103	1	RedKDN1Fo1SO4
	21	23	1	14	0	0	513.112	1	dAmidKDN1Ac1Fo1Gc
	20	25	4	10	0	1	513.129	2	dHydroPse2Ac1SO4	dHydroPse1Me1Ac1Fo1SO4
	20	26	4	10	1	0	513.139	6	dOxyPse2Ac1PO4	dHydroPse1Hb1PO4	dHydroNeu2Me1Am1PO4	dHydroPse1Me1Lt1PO4	dHydroPse2Me1Gc1PO4	dOxyPse1Me1Ac1Fo1PO4
	18	29	2	13	0	1	513.139	1	RedKDN2Me1SO4
	21	27	3	10	0	1	513.142	2	dOxyKDN1AcCys	dOxyKDN1Me1FoCys
	22	27	1	13	0	0	513.148	5	dAmidKDN1Ac1Hb	dAmidKDN1Me1Hb1Fo	dAmidKDN1Me1Ac1Lt	dAmidKDN2Me1Fo1Lt	dAmidKDN2Me1Ac1Gc
	19	26	6	9	1	0	513.15	1	AmidPse1Fo1Am1PO4
	20	27	5	9	0	1	513.153	2	OxyPse1FoCys	AmidNeu1FoCys
	21	27	3	12	0	0	513.159	44	KDNGlu	Neu1Gc1Lt	Neu1Ac1Pr	KDN1Pr1Am	KDN1GcAla	KDN1MeAsp	KDN1LtGly	KDN1AcSer	KDN1FoThr	dAmidNeuGlu	dAmidKDNGln	Neu1Me1Pr1Fo	OxyNeu1Hb1Fo	OxyNeu1Ac1Lt	OxyKDN1Am1Lt	OxyKDN1AcAla	KDN1Me1GcGly	KDN1Me1FoSer	dOxyNeu1Pr1Gc	AmidKDN1Gc1Lt	AmidKDN1Ac1Pr	dOxyKDN1PrGly	dOxyKDN1GcSer	dAmidNeu1Pr1Am	HydroNeu2Ac1Fo	dAmidNeu1GcAla	dAmidNeu1MeAsp	dAmidNeu1LtGly	dAmidNeu1AcSer	dAmidNeu1FoThr	dAmidPse1Pr1Gc	dAmidKDN1MeAsn	dAmidKDN1AmSer	OxyNeu1Me1Fo1Lt	OxyNeu1Me1Ac1Gc	OxyNeu2Me1Fo1Gc	OxyKDN1Me1Am1Gc	OxyKDN1Me1FoAla	OxyKDN1Me1AcGly	OxyKDN2Me1FoGly	AmidKDN1Me1Pr1Fo
	20	27	5	11	0	0	513.171	1	OxyNeuAsn
	25	27	3	9	0	0	513.175	1	dHydroKDNPhe
	22	31	3	9	0	1	513.178	2	dOxyKDN3MeCys	dOxyKDN1MeMet
	23	31	1	12	0	0	513.185	1	dAmidKDN3Me1Hb
	20	30	6	8	1	0	513.186	1	AmidPse2Me1Am1PO4
	21	31	5	8	0	1	513.189	4	OxyPseMet	AmidNeuMet	OxyPse2MeCys	AmidNeu2MeCys
	22	31	3	11	0	0	513.196	19	Neu3Me1Pr	OxyKDNLeu	KDN3MeSer	KDN2MeThr	dOxyNeuFuc	dAmidPseFuc	dAmidKDNLys	OxyNeu2Me1Hb	OxyNeu3Me1Lt	OxyKDN3MeAla	OxyKDN1MeVal	dOxyNeu1MeXyl	AmidKDN3Me1Pr	HydroNeu2Me2Ac	dAmidNeu3MeSer	dAmidNeu2MeThr	dAmidPse1MeXyl	HydroKDN1MePro	HydroKDN2Me1Ac1Am
	23	27	7	7	0	0	513.197	1	dHydroPse1FoHis
	21	31	5	10	0	0	513.207	13	HydroPseGlu	HydroNeu1AmAla	HydroPse1Pr1Am	HydroPse1GcAla	HydroPse1MeAsp	HydroPse1LtGly	HydroPse1AcSer	HydroPse1FoThr	RedPse1Fo1Am1Gc	RedPse1Ac1FoGly	HydroNeu1Me1AmGly	HydroPse1Me1GcGly	HydroPse1Me1FoSer
	25	31	5	7	0	0	513.222	2	PsePhe	dOxyPseTyr
	24	31	7	6	0	0	513.234	1	dHydroPse2MeHis
	22	35	5	9	0	0	513.244	10	RedPse1Hb1Am	RedPse1FoVal	HydroPse3MeSer	HydroPse2MeThr	RedPse1Me1Am1Lt	RedPse2Me1Am1Gc	RedPse1Me1AcAla	RedPse2Me1FoAla	RedPse2Me1AcGly	RedPse3Me1FoGly
	23	39	5	8	0	0	513.28	2	RedPse1MeLeu	RedPse2MeVal
	19	21	3	12	1	0	514.086	2	dHydroNeu1Ac1Fo1PO4	dHydroKDN1Fo1Am1PO4
	20	25	3	11	1	0	514.123	2	dHydroNeu2Me1Ac1PO4	dHydroKDN2Me1Am1PO4
	19	24	5	10	0	1	514.124	1	dHydroPse1Fo1SO4Gly
	19	25	5	10	1	0	514.134	4	Pse1Fo1Am1PO4	dHydroPse1PO4Ser	AmidPse1Ac1Fo1PO4	dOxyPse1Fo1PO4Gly
	20	26	4	10	0	1	514.137	2	Neu1FoCys	AmidKDN1FoCys
	21	26	2	13	0	0	514.144	22	KDN1Gc1Lt	KDN1Ac1Pr	dAmidKDNGlu	KDN1Me1Pr1Fo	OxyKDN1Hb1Fo	OxyKDN1Ac1Lt	dOxyKDN1Pr1Gc	dAmidNeu1Gc1Lt	dAmidNeu1Ac1Pr	dAmidKDN1Pr1Am	HydroKDN2Ac1Fo	dAmidKDN1GcAla	dAmidKDN1MeAsp	dAmidKDN1LtGly	dAmidKDN1AcSer	dAmidKDN1FoThr	OxyKDN1Me1Fo1Lt	OxyKDN1Me1Ac1Gc	OxyKDN2Me1Fo1Gc	dAmidNeu1Me1Pr1Fo	dAmidKDN1Me1GcGly	dAmidKDN1Me1FoSer
	20	26	4	12	0	0	514.155	4	OxyNeuAsp	OxyKDNAsn	OxyNeu1GcGly	OxyNeu1FoSer
	20	28	5	9	0	1	514.161	4	dOxyPse1Ac1Am1SO4	dHydroPse1Me1SO4Ala	dHydroPse2Me1SO4Gly	dOxyPse1Me1Fo1Am1SO4
	20	29	5	9	1	0	514.17	4	Pse2Me1Am1PO4	AmidPse2Me1Ac1PO4	dOxyPse1Me1PO4Ala	dOxyPse2Me1PO4Gly
	21	30	4	9	0	1	514.173	4	NeuMet	Neu2MeCys	AmidKDNMet	AmidKDN2MeCys
	22	30	2	12	0	0	514.18	9	KDN3Me1Pr	dOxyKDNFuc	OxyKDN2Me1Hb	OxyKDN3Me1Lt	dOxyKDN1MeXyl	dAmidNeu3Me1Pr	HydroKDN2Me2Ac	dAmidKDN3MeSer	dAmidKDN2MeThr
	21	30	4	11	0	0	514.191	17	OxyPseXyl	AmidNeuXyl	OxyNeu2MeSer	OxyNeu1MeThr	HydroNeu1Am1Lt	HydroNeu1AcAla	HydroPse1Gc1Lt	HydroPse1Ac1Pr	HydroKDN1AmAla	RedNeu1Ac1Fo1Am	RedPse1Ac1Fo1Gc	HydroNeu1Me1Am1Gc	HydroNeu1Me1FoAla	HydroNeu1Me1AcGly	HydroNeu2Me1FoGly	HydroPse1Me1Pr1Fo	HydroKDN1Me1AmGly
	25	30	4	8	0	0	514.206	2	dOxyNeuPhe	dAmidPsePhe
	24	30	6	7	0	0	514.218	1	dHydroPse1Fo1AmPro
	22	34	4	10	0	0	514.227	11	HydroNeuLeu	RedNeu1MePro	RedPse1Ac1Hb	HydroNeu3MeAla	HydroNeu1MeVal	HydroPse3Me1Pr	RedNeu2Me1Ac1Am	RedPse1Me1Hb1Fo	RedPse1Me1Ac1Lt	RedPse2Me1Fo1Lt	RedPse2Me1Ac1Gc
	21	34	6	9	0	0	514.239	3	RedPseGln	RedPse1MeAsn	RedPse1AmSer
	25	34	6	6	0	0	514.254	1	dHydroPse2Me1AmPro
	23	38	4	9	0	0	514.264	1	RedPse3Me1Hb
	22	38	6	8	0	0	514.275	1	RedPseLys
	19	20	2	13	1	0	515.07	1	dHydroKDN1Ac1Fo1PO4
	20	24	2	12	1	0	515.107	1	dHydroKDN2Me1Ac1PO4
	19	23	4	11	0	1	515.108	2	dHydroNeu1Fo1Am1SO4	dHydroPse1Fo1Gc1SO4
	19	24	4	11	1	0	515.118	7	Pse1Ac1Fo1PO4	dHydroNeu1PO4Ala	dHydroPse1Pr1PO4	dOxyNeu1Fo1Am1PO4	dOxyPse1Fo1Gc1PO4	dAmidPse1Fo1Am1PO4	dHydroNeu1Me1PO4Gly
	20	25	3	11	0	1	515.121	2	KDN1FoCys	dAmidNeu1FoCys
	21	25	1	14	0	0	515.128	3	dAmidKDN1Gc1Lt	dAmidKDN1Ac1Pr	dAmidKDN1Me1Pr1Fo
	20	25	3	13	0	0	515.139	4	OxyKDNAsp	OxyNeu1Pr1Fo	OxyKDN1GcGly	OxyKDN1FoSer
	20	27	4	10	0	1	515.145	6	dOxyPse2Ac1SO4	dHydroPse1Hb1SO4	dHydroNeu2Me1Am1SO4	dHydroPse1Me1Lt1SO4	dHydroPse2Me1Gc1SO4	dOxyPse1Me1Ac1Fo1SO4
	20	28	4	10	1	0	515.154	6	Pse2Me1Ac1PO4	dOxyPse1Hb1PO4	dOxyNeu2Me1Am1PO4	dOxyPse1Me1Lt1PO4	dOxyPse2Me1Gc1PO4	dAmidPse2Me1Am1PO4
	19	27	6	9	0	1	515.156	1	AmidPse1Fo1Am1SO4
	21	29	3	10	0	1	515.157	4	KDNMet	KDN2MeCys	dAmidNeuMet	dAmidNeu2MeCys
	22	29	1	13	0	0	515.164	1	dAmidKDN3Me1Pr
	19	28	6	9	1	0	515.165	2	AmidPse1PO4Ala	AmidPse1Me1PO4Gly
	20	29	5	9	0	1	515.169	1	HydroPse1FoCys
	21	29	3	12	0	0	515.175	18	NeuXyl	AmidKDNXyl	OxyNeu2Me1Pr	RedNeu2Ac1Fo	OxyKDN2MeSer	OxyKDN1MeThr	HydroNeu1Hb1Fo	HydroNeu1Ac1Lt	HydroKDN1Am1Lt	HydroKDN1AcAla	RedKDN1Ac1Fo1Am	HydroNeu1Me1Fo1Lt	HydroNeu1Me1Ac1Gc	HydroNeu2Me1Fo1Gc	HydroKDN1Me1Am1Gc	HydroKDN1Me1FoAla	HydroKDN1Me1AcGly	HydroKDN2Me1FoGly
	20	29	5	11	0	0	515.186	1	HydroNeuAsn
	25	29	3	9	0	0	515.19	1	dOxyKDNPhe
	20	31	6	8	0	1	515.192	1	AmidPse2Me1Am1SO4
	24	29	5	8	0	0	515.202	2	dHydroPse3Ac1Am	dHydroPse1Ac1FoPro
	21	33	5	8	0	1	515.205	2	HydroPseMet	HydroPse2MeCys
	22	33	3	11	0	0	515.212	8	HydroKDNLeu	RedNeu2Me2Ac	RedKDN1MePro	HydroNeu2Me1Hb	HydroNeu3Me1Lt	HydroKDN3MeAla	HydroKDN1MeVal	RedKDN2Me1Ac1Am
	23	29	7	7	0	0	515.213	1	dOxyPse1FoHis
	21	33	5	10	0	0	515.223	11	RedPseGlu	RedNeu1AmAla	RedPse1Pr1Am	RedPse1GcAla	RedPse1MeAsp	RedPse1LtGly	RedPse1AcSer	RedPse1FoThr	RedNeu1Me1AmGly	RedPse1Me1GcGly	RedPse1Me1FoSer
	25	33	5	7	0	0	515.238	2	dHydroPse2Me1AcPro	dHydroPse3Me1FoPro
	24	33	7	6	0	0	515.249	1	dOxyPse2MeHis
	22	37	5	9	0	0	515.259	2	RedPse3MeSer	RedPse2MeThr
	19	22	3	12	0	1	516.092	2	dHydroNeu1Ac1Fo1SO4	dHydroKDN1Fo1Am1SO4
	19	23	3	12	1	0	516.102	7	dHydroNeu1Lt1PO4	dHydroKDN1PO4Ala	dOxyNeu1Ac1Fo1PO4	dOxyKDN1Fo1Am1PO4	dAmidPse1Ac1Fo1PO4	dHydroNeu1Me1Gc1PO4	dHydroKDN1Me1PO4Gly
	20	24	2	12	0	1	516.105	1	dAmidKDN1FoCys
	20	24	2	14	0	0	516.123	1	OxyKDN1Pr1Fo
	20	26	3	11	0	1	516.129	2	dHydroNeu2Me1Ac1SO4	dHydroKDN2Me1Am1SO4
	20	27	3	11	1	0	516.138	3	dOxyNeu2Me1Ac1PO4	dOxyKDN2Me1Am1PO4	dAmidPse2Me1Ac1PO4
	19	26	5	10	0	1	516.14	4	Pse1Fo1Am1SO4	dHydroPse1SO4Ser	AmidPse1Ac1Fo1SO4	dOxyPse1Fo1SO4Gly
	21	28	2	11	0	1	516.141	2	dAmidKDNMet	dAmidKDN2MeCys
	19	27	5	10	1	0	516.15	7	Pse1PO4Ala	Pse1Me1PO4Gly	AmidPse1Lt1PO4	dOxyPse1PO4Ser	OxyPse1Me1Am1PO4	AmidNeu1Me1Am1PO4	AmidPse1Me1Gc1PO4
	20	28	4	10	0	1	516.153	1	OxyNeu1MeCys
	21	28	2	13	0	0	516.159	9	KDNXyl	dAmidNeuXyl	OxyKDN2Me1Pr	RedKDN2Ac1Fo	HydroKDN1Hb1Fo	HydroKDN1Ac1Lt	HydroKDN1Me1Fo1Lt	HydroKDN1Me1Ac1Gc	HydroKDN2Me1Fo1Gc
	20	28	4	12	0	0	516.17	4	HydroNeuAsp	HydroKDNAsn	HydroNeu1GcGly	HydroNeu1FoSer
	20	30	5	9	0	1	516.176	4	Pse2Me1Am1SO4	AmidPse2Me1Ac1SO4	dOxyPse1Me1SO4Ala	dOxyPse2Me1SO4Gly
	22	32	2	12	0	0	516.196	3	RedKDN2Me2Ac	HydroKDN2Me1Hb	HydroKDN3Me1Lt
	23	28	6	8	0	0	516.197	2	dHydroNeu1MeHis	dHydroPse1Ac1Fo1AmGly
	21	32	4	11	0	0	516.207	14	HydroPseXyl	RedNeu1Am1Lt	RedNeu1AcAla	RedPse1Gc1Lt	RedPse1Ac1Pr	RedKDN1AmAla	HydroNeu2MeSer	HydroNeu1MeThr	RedNeu1Me1Am1Gc	RedNeu1Me1FoAla	RedNeu1Me1AcGly	RedNeu2Me1FoGly	RedPse1Me1Pr1Fo	RedKDN1Me1AmGly
	24	32	6	7	0	0	516.233	5	dOxyPse1Fo1AmPro	dHydroPse1Fo1AmVal	dHydroPse1Me1Ac1AmAla	dHydroPse2Me1Fo1AmAla	dHydroPse2Me1Ac1AmGly
	22	36	4	10	0	0	516.243	4	RedNeuLeu	RedNeu3MeAla	RedNeu1MeVal	RedPse3Me1Pr
	23	32	8	6	0	0	516.245	1	AmidPse1MeHis
	25	36	6	6	0	0	516.27	3	dOxyPse2Me1AmPro	dHydroPse1Me1AmLeu	dHydroPse2Me1AmVal
	19	21	2	13	0	1	517.076	1	dHydroKDN1Ac1Fo1SO4
	19	22	2	13	1	0	517.086	3	dHydroKDN1Lt1PO4	dOxyKDN1Ac1Fo1PO4	dHydroKDN1Me1Gc1PO4
	20	25	2	12	0	1	517.113	1	dHydroKDN2Me1Ac1SO4
	20	26	2	12	1	0	517.122	1	dOxyKDN2Me1Ac1PO4
	19	25	4	11	0	1	517.124	7	Pse1Ac1Fo1SO4	dHydroNeu1SO4Ala	dHydroPse1Pr1SO4	dOxyNeu1Fo1Am1SO4	dOxyPse1Fo1Gc1SO4	dAmidPse1Fo1Am1SO4	dHydroNeu1Me1SO4Gly
	19	26	4	11	1	0	517.134	13	Pse1Lt1PO4	Neu1Me1Am1PO4	Pse1Me1Gc1PO4	dOxyNeu1PO4Ala	dOxyPse1Pr1PO4	dAmidPse1PO4Ala	OxyPse1Me1Ac1PO4	OxyPse2Me1Fo1PO4	AmidNeu1Me1Ac1PO4	AmidNeu2Me1Fo1PO4	dOxyNeu1Me1PO4Gly	AmidKDN1Me1Am1PO4	dAmidPse1Me1PO4Gly
	20	27	3	11	0	1	517.137	1	OxyKDN1MeCys
	21	27	1	14	0	0	517.143	1	dAmidKDNXyl
	20	27	3	13	0	0	517.154	4	HydroKDNAsp	HydroNeu1Pr1Fo	HydroKDN1GcGly	HydroKDN1FoSer
	20	29	4	10	0	1	517.16	6	Pse2Me1Ac1SO4	dOxyPse1Hb1SO4	dOxyNeu2Me1Am1SO4	dOxyPse1Me1Lt1SO4	dOxyPse2Me1Gc1SO4	dAmidPse2Me1Am1SO4
	19	29	6	9	0	1	517.172	2	AmidPse1SO4Ala	AmidPse1Me1SO4Gly
	23	27	5	9	0	0	517.181	3	dHydroKDN1MeHis	dHydroPse2Ac1FoGly	dHydroPse1Ac1Fo1Am1Gc
	20	31	5	9	0	1	517.184	1	RedPse1FoCys
	21	31	3	12	0	0	517.191	14	RedNeu1Hb1Fo	RedNeu1Ac1Lt	RedKDN1Am1Lt	RedKDN1AcAla	HydroNeu2Me1Pr	HydroKDN2MeSer	HydroKDN1MeThr	RedNeu1Me1Fo1Lt	RedNeu1Me1Ac1Gc	RedNeu2Me1Fo1Gc	RedKDN1Me1Am1Gc	RedKDN1Me1FoAla	RedKDN1Me1AcGly	RedKDN2Me1FoGly
	20	31	5	11	0	0	517.202	1	RedNeuAsn
	24	31	5	8	0	0	517.217	12	dOxyPse3Ac1Am	dHydroPse1LtPro	dOxyPse1Ac1FoPro	dHydroNeu1Me1AmPro	dHydroPse1Ac1Hb1Am	dHydroPse1Me2AcAla	dHydroPse2Me2AcGly	dHydroPse1Me1GcPro	dHydroPse1Ac1FoVal	dHydroPse1Me1Hb1Fo1Am	dHydroPse1Me1Ac1Am1Lt	dHydroPse2Me1Ac1FoAla
	21	35	5	8	0	1	517.221	2	RedPseMet	RedPse2MeCys
	22	35	3	11	0	0	517.227	5	RedKDNLeu	RedNeu2Me1Hb	RedNeu3Me1Lt	RedKDN3MeAla	RedKDN1MeVal
	23	31	7	7	0	0	517.229	3	Pse1MeHis	dHydroPse1AmGln	dHydroPse1Me1AmAsn
	25	35	5	7	0	0	517.254	6	dOxyPse2Me1AcPro	dOxyPse3Me1FoPro	dHydroPse1Me1AcLeu	dHydroPse2Me1FoLeu	dHydroPse2Me1AcVal	dHydroPse3Me1FoVal
	24	35	7	6	0	0	517.265	2	dHydroPse1AmLys	AmidPse1Me1AmPro
	19	24	3	12	0	1	518.108	7	dHydroNeu1Lt1SO4	dHydroKDN1SO4Ala	dOxyNeu1Ac1Fo1SO4	dOxyKDN1Fo1Am1SO4	dAmidPse1Ac1Fo1SO4	dHydroNeu1Me1Gc1SO4	dHydroKDN1Me1SO4Gly
	19	25	3	12	1	0	518.118	12	Neu1Me1Ac1PO4	Neu2Me1Fo1PO4	KDN1Me1Am1PO4	dOxyNeu1Lt1PO4	dOxyKDN1PO4Ala	dAmidPse1Lt1PO4	dOxyNeu1Me1Gc1PO4	AmidKDN1Me1Ac1PO4	AmidKDN2Me1Fo1PO4	dOxyKDN1Me1PO4Gly	dAmidNeu1Me1Am1PO4	dAmidPse1Me1Gc1PO4
	18	25	5	11	1	0	518.129	2	OxyPse1PO4Gly	AmidNeu1PO4Gly
	20	26	2	14	0	0	518.138	1	HydroKDN1Pr1Fo
	20	28	3	11	0	1	518.144	3	dOxyNeu2Me1Ac1SO4	dOxyKDN2Me1Am1SO4	dAmidPse2Me1Ac1SO4
	19	28	5	10	0	1	518.156	7	Pse1SO4Ala	Pse1Me1SO4Gly	AmidPse1Lt1SO4	dOxyPse1SO4Ser	OxyPse1Me1Am1SO4	AmidNeu1Me1Am1SO4	AmidPse1Me1Gc1SO4
	23	26	4	10	0	0	518.165	2	dHydroNeu2Ac1Fo1Am	dHydroPse2Ac1Fo1Gc
	19	29	5	10	1	0	518.165	1	HydroPse1Me1Am1PO4
	20	30	4	10	0	1	518.168	1	HydroNeu1MeCys
	21	30	2	13	0	0	518.175	6	RedKDN1Hb1Fo	RedKDN1Ac1Lt	HydroKDN2Me1Pr	RedKDN1Me1Fo1Lt	RedKDN1Me1Ac1Gc	RedKDN2Me1Fo1Gc
	20	30	4	12	0	0	518.186	4	RedNeuAsp	RedKDNAsn	RedNeu1GcGly	RedNeu1FoSer
	24	30	4	9	0	0	518.201	6	dHydroPse2Ac1Hb	dHydroNeu1Me1AcPro	dHydroNeu2Me1FoPro	dHydroPse1Me2Ac1Lt	dHydroKDN1Me1AmPro	dHydroPse1Me1Ac1Hb1Fo
	22	34	2	12	0	0	518.211	2	RedKDN2Me1Hb	RedKDN3Me1Lt
	23	30	6	8	0	0	518.212	16	dOxyNeu1MeHis	dAmidPse1MeHis	dHydroPse1AmGlu	dHydroPse1AcGln	AmidPse2Ac1Fo1Am	dHydroPse1Am1GcAla	dHydroPse1Me1AcAsn	dHydroPse2Me1FoAsn	dHydroPse1Me1AmAsp	dHydroPse1Me1FoGln	dHydroPse1Am1LtGly	dHydroPse1Ac1AmSer	dHydroPse1Fo1AmThr	dOxyPse1Ac1Fo1AmGly	dHydroPse1Me1Am1GcGly	dHydroPse1Me1Fo1AmSer
	21	34	4	11	0	0	518.222	3	RedPseXyl	RedNeu2MeSer	RedNeu1MeThr
	24	34	6	7	0	0	518.249	12	Pse1Me1AmPro	dHydroPse3MeGln	dHydroPse1AcLys	AmidPse1Me1AcPro	AmidPse2Me1FoPro	dOxyPse1Fo1AmVal	dHydroPse1Me1FoLys	dHydroPse3Me1AmSer	dHydroPse2Me1AmThr	dOxyPse1Me1Ac1AmAla	dOxyPse2Me1Fo1AmAla	dOxyPse2Me1Ac1AmGly
	23	34	8	6	0	0	518.26	1	dHydroPse1MeArg
	25	38	6	6	0	0	518.285	3	dHydroPse3MeLys	dOxyPse1Me1AmLeu	dOxyPse2Me1AmVal
	19	23	2	13	0	1	519.092	3	dHydroKDN1Lt1SO4	dOxyKDN1Ac1Fo1SO4	dHydroKDN1Me1Gc1SO4
	19	24	2	13	1	0	519.102	7	KDN1Me1Ac1PO4	KDN2Me1Fo1PO4	dOxyKDN1Lt1PO4	dOxyKDN1Me1Gc1PO4	dAmidNeu1Me1Ac1PO4	dAmidNeu2Me1Fo1PO4	dAmidKDN1Me1Am1PO4
	18	24	4	12	1	0	519.113	5	Neu1PO4Gly	OxyNeu1Am1PO4	OxyPse1Gc1PO4	AmidNeu1Gc1PO4	AmidKDN1PO4Gly
	20	27	2	12	0	1	519.129	1	dOxyKDN2Me1Ac1SO4
	19	27	4	11	0	1	519.14	13	Pse1Lt1SO4	Neu1Me1Am1SO4	Pse1Me1Gc1SO4	dOxyNeu1SO4Ala	dOxyPse1Pr1SO4	dAmidPse1SO4Ala	OxyPse1Me1Ac1SO4	OxyPse2Me1Fo1SO4	AmidNeu1Me1Ac1SO4	AmidNeu2Me1Fo1SO4	dOxyNeu1Me1SO4Gly	AmidKDN1Me1Am1SO4	dAmidPse1Me1SO4Gly
	23	25	3	11	0	0	519.149	2	dHydroNeu3Ac1Fo	dHydroKDN2Ac1Fo1Am
	19	28	4	11	1	0	519.149	2	HydroPse1Me1Ac1PO4	HydroPse2Me1Fo1PO4
	20	29	3	11	0	1	519.152	1	HydroKDN1MeCys
	20	29	3	13	0	0	519.17	4	RedKDNAsp	RedNeu1Pr1Fo	RedKDN1GcGly	RedKDN1FoSer
	24	29	3	10	0	0	519.185	2	dHydroKDN1Me1AcPro	dHydroKDN2Me1FoPro
	23	29	5	9	0	0	519.197	27	Pse2Ac1Fo1Am	AmidPse3Ac1Fo	dOxyKDN1MeHis	dHydroPse1AcGlu	dHydroPse2AcSer	dOxyPse2Ac1FoGly	dHydroNeu1Ac1AmAla	dHydroPse1Am1Gc1Lt	dHydroPse1Ac1Pr1Am	dHydroPse1Fo1LtAla	dHydroPse1Ac1GcAla	dHydroPse1Me1AcAsp	dHydroPse2Me1FoAsp	dHydroPse1Me1FoGlu	dHydroPse1Hb1FoGly	dHydroPse1Ac1LtGly	dHydroPse1Ac1FoThr	dOxyPse1Ac1Fo1Am1Gc	dHydroNeu1Me1Fo1AmAla	dHydroNeu1Me1Ac1AmGly	dHydroNeu2Me1Fo1AmGly	dHydroPse1Me1Pr1Fo1Am	dHydroPse1Me1Fo1GcAla	dHydroPse1Me1Fo1LtGly	dHydroPse1Me1Ac1GcGly	dHydroPse2Me1Fo1GcGly	dHydroPse1Me1Ac1FoSer
	21	33	3	12	0	0	519.206	3	RedNeu2Me1Pr	RedKDN2MeSer	RedKDN1MeThr
	22	29	7	8	0	0	519.208	2	OxyPseHis	AmidNeuHis
	24	33	5	8	0	0	519.233	28	Pse1Me1AcPro	Pse2Me1FoPro	dOxyPse1LtPro	dHydroNeu1AmLeu	dHydroPse3MeGlu	dHydroPse1GcLeu	dHydroPse1LtVal	dOxyNeu1Me1AmPro	dOxyPse1Ac1Hb1Am	dOxyPse1Me2AcAla	dOxyPse2Me2AcGly	dOxyPse1Me1GcPro	dOxyPse1Ac1FoVal	dAmidPse1Me1AmPro	dHydroNeu3Me1AmAla	dHydroNeu1Me1AmVal	dHydroPse1Me1HbAla	dHydroPse2Me1LtAla	dHydroPse3Me1GcAla	dHydroPse2Me1HbGly	dHydroPse3Me1LtGly	dHydroPse3Me1AcSer	dHydroPse2Me1AcThr	dHydroPse3Me1FoThr	dHydroPse1Me1GcVal	dOxyPse1Me1Hb1Fo1Am	dOxyPse1Me1Ac1Am1Lt	dOxyPse2Me1Ac1FoAla
	23	33	7	7	0	0	519.244	6	dOxyPse1AmGln	AmidPse1Ac1AmAla	dOxyPse1Me1AmAsn	AmidPse1Me1Fo1AmAla	AmidPse1Me1Ac1AmGly	AmidPse2Me1Fo1AmGly
	25	37	5	7	0	0	519.269	4	dOxyPse1Me1AcLeu	dOxyPse2Me1FoLeu	dOxyPse2Me1AcVal	dOxyPse3Me1FoVal
	24	37	7	6	0	0	519.28	4	AmidPse1AmLeu	dOxyPse1AmLys	AmidPse3Me1AmAla	AmidPse1Me1AmVal
	19	23	1	14	1	0	520.086	2	dAmidKDN1Me1Ac1PO4	dAmidKDN2Me1Fo1PO4
	18	23	3	13	1	0	520.097	7	Neu1Gc1PO4	KDN1PO4Gly	OxyNeu1Ac1PO4	OxyKDN1Am1PO4	AmidKDN1Gc1PO4	dAmidNeu1PO4Gly	OxyNeu1Me1Fo1PO4
	19	26	3	12	0	1	520.124	12	Neu1Me1Ac1SO4	Neu2Me1Fo1SO4	KDN1Me1Am1SO4	dOxyNeu1Lt1SO4	dOxyKDN1SO4Ala	dAmidPse1Lt1SO4	dOxyNeu1Me1Gc1SO4	AmidKDN1Me1Ac1SO4	AmidKDN2Me1Fo1SO4	dOxyKDN1Me1SO4Gly	dAmidNeu1Me1Am1SO4	dAmidPse1Me1Gc1SO4
	23	24	2	12	0	0	520.133	1	dHydroKDN3Ac1Fo
	19	27	3	12	1	0	520.133	1	OxyNeu3Me1PO4
	18	26	5	11	0	1	520.135	2	OxyPse1SO4Gly	AmidNeu1SO4Gly
	18	27	5	11	1	0	520.144	1	HydroPse1PO4Gly
	20	28	2	14	0	0	520.154	1	RedKDN1Pr1Fo
	19	30	5	10	0	1	520.171	1	HydroPse1Me1Am1SO4
	22	28	6	7	0	1	520.174	1	dHydroPse1Fo1AmCys
	23	28	4	10	0	0	520.181	22	Pse3Ac1Fo	dHydroNeu2AcAla	dHydroNeu1GcPro	dHydroPse2Ac1Pr	dOxyNeu2Ac1Fo1Am	dOxyPse2Ac1Fo1Gc	dAmidPse2Ac1Fo1Am	dHydroNeu1Hb1Fo1Am	dHydroNeu1Ac1Am1Lt	dHydroNeu1Me2AcGly	dHydroPse1Hb1Fo1Gc	dHydroPse1Ac1Gc1Lt	dHydroKDN1Ac1AmAla	dHydroNeu1Me1Fo1Am1Lt	dHydroNeu1Me1Ac1Am1Gc	dHydroNeu1Me1Ac1FoAla	dHydroNeu2Me1Ac1FoGly	dHydroPse1Me1Fo1Gc1Lt	dHydroPse1Me1Ac1Pr1Fo	dHydroKDN1Me1Fo1AmAla	dHydroKDN1Me1Ac1AmGly	dHydroKDN2Me1Fo1AmGly
	19	31	5	10	1	0	520.181	1	RedPse1Me1Am1PO4
	20	32	4	10	0	1	520.184	1	RedNeu1MeCys
	21	32	2	13	0	0	520.19	1	RedKDN2Me1Pr
	22	28	6	9	0	0	520.192	4	NeuHis	AmidKDNHis	dHydroNeu1AmAsn	dHydroPse1GcAsn
	23	32	6	6	0	1	520.21	2	dHydroPse1AmMet	dHydroPse2Me1AmCys
	24	32	4	9	0	0	520.217	20	dHydroPse2Hb	dOxyPse2Ac1Hb	dHydroNeu1AcLeu	dHydroKDN1AmLeu	dOxyNeu1Me1AcPro	dOxyNeu2Me1FoPro	dOxyPse1Me2Ac1Lt	dOxyKDN1Me1AmPro	dAmidPse1Me1AcPro	dAmidPse2Me1FoPro	dHydroNeu2Me1Hb1Am	dHydroNeu3Me1AcAla	dHydroNeu1Me1FoLeu	dHydroNeu1Me1AcVal	dHydroNeu2Me1FoVal	dHydroPse1Me1Hb1Lt	dHydroPse2Me1Hb1Gc	dHydroKDN3Me1AmAla	dHydroKDN1Me1AmVal	dOxyPse1Me1Ac1Hb1Fo
	23	32	6	8	0	0	520.228	27	Pse1Ac1AmAla	OxyPse1AmPro	AmidNeu1AmPro	AmidPse2AcAla	dOxyPse1AmGlu	dOxyPse1AcGln	AmidPse1GcPro	Pse1Me1Fo1AmAla	Pse1Me1Ac1AmGly	Pse2Me1Fo1AmGly	AmidPse1Hb1Fo1Am	AmidPse1Ac1Am1Lt	dOxyPse1Am1GcAla	dOxyPse1Me1AcAsn	dOxyPse2Me1FoAsn	dOxyPse1Me1AmAsp	dOxyPse1Me1FoGln	AmidPse1Me2AcGly	dOxyPse1Am1LtGly	dOxyPse1Ac1AmSer	dOxyPse1Fo1AmThr	AmidPse1Me1Fo1Am1Lt	AmidPse1Me1Ac1Am1Gc	AmidPse1Me1Ac1FoAla	AmidPse2Me1Ac1FoGly	dOxyPse1Me1Am1GcGly	dOxyPse1Me1Fo1AmSer
	22	32	8	7	0	0	520.239	1	AmidPse1AmAsn
	25	36	4	8	0	0	520.253	1	dHydroNeu3MeLeu
	24	36	6	7	0	0	520.264	14	Pse1AmLeu	Pse3Me1AmAla	Pse1Me1AmVal	dOxyPse3MeGln	AmidPse1AcLeu	dOxyPse1AcLys	AmidPse2Me1Hb1Am	AmidPse3Me1AcAla	AmidPse1Me1FoLeu	dOxyPse1Me1FoLys	dOxyPse3Me1AmSer	dOxyPse2Me1AmThr	AmidPse1Me1AcVal	AmidPse2Me1FoVal
	23	36	8	6	0	0	520.276	1	dOxyPse1MeArg
	25	40	6	6	0	0	520.301	2	AmidPse3MeLeu	dOxyPse3MeLys
	18	22	2	14	1	0	521.081	5	KDN1Gc1PO4	OxyKDN1Ac1PO4	dAmidNeu1Gc1PO4	dAmidKDN1PO4Gly	OxyKDN1Me1Fo1PO4
	19	25	2	13	0	1	521.108	7	KDN1Me1Ac1SO4	KDN2Me1Fo1SO4	dOxyKDN1Lt1SO4	dOxyKDN1Me1Gc1SO4	dAmidNeu1Me1Ac1SO4	dAmidNeu2Me1Fo1SO4	dAmidKDN1Me1Am1SO4
	19	26	2	13	1	0	521.117	1	OxyKDN3Me1PO4
	18	25	4	12	0	1	521.119	5	Neu1SO4Gly	OxyNeu1Am1SO4	OxyPse1Gc1SO4	AmidNeu1Gc1SO4	AmidKDN1SO4Gly
	18	26	4	12	1	0	521.129	2	HydroNeu1Am1PO4	HydroPse1Gc1PO4
	19	29	4	11	0	1	521.155	2	HydroPse1Me1Ac1SO4	HydroPse2Me1Fo1SO4
	22	27	5	8	0	1	521.158	1	dHydroPse1Ac1FoCys
	23	27	3	11	0	0	521.165	16	dOxyNeu3Ac1Fo	dAmidPse3Ac1Fo	dHydroNeu2Ac1Lt	dHydroKDN2AcAla	dHydroKDN1GcPro	dOxyKDN2Ac1Fo1Am	dHydroNeu1Ac1Hb1Fo	dHydroNeu1Me2Ac1Gc	dHydroKDN1Hb1Fo1Am	dHydroKDN1Ac1Am1Lt	dHydroKDN1Me2AcGly	dHydroNeu1Me1Ac1Fo1Lt	dHydroKDN1Me1Fo1Am1Lt	dHydroKDN1Me1Ac1Am1Gc	dHydroKDN1Me1Ac1FoAla	dHydroKDN2Me1Ac1FoGly
	19	30	4	11	1	0	521.165	2	RedPse1Me1Ac1PO4	RedPse2Me1Fo1PO4
	20	31	3	11	0	1	521.168	1	RedKDN1MeCys
	22	27	5	10	0	0	521.176	12	KDNHis	dAmidNeuHis	dHydroNeu1AcAsn	dHydroNeu1AmAsp	dHydroNeu1FoGln	dHydroPse1GcAsp	dHydroKDN1AmAsn	dHydroNeu1Me1FoAsn	dHydroNeu1Am1GcGly	dHydroNeu1Fo1AmSer	dHydroPse1Pr1FoGly	dHydroPse1Fo1GcSer
	23	31	5	7	0	1	521.194	4	dHydroPse1AcMet	dHydroPse2Me1AcCys	dHydroPse3Me1FoCys	dHydroPse1Me1FoMet
	24	31	3	10	0	0	521.201	9	dHydroKDN1AcLeu	dOxyKDN1Me1AcPro	dOxyKDN2Me1FoPro	dHydroNeu2Me1Ac1Hb	dHydroKDN2Me1Hb1Am	dHydroKDN3Me1AcAla	dHydroKDN1Me1FoLeu	dHydroKDN1Me1AcVal	dHydroKDN2Me1FoVal
	23	31	5	9	0	0	521.212	60	Neu1AmPro	Pse2AcAla	Pse1GcPro	Pse1Hb1Fo1Am	Pse1Ac1Am1Lt	Pse1Me2AcGly	OxyPse1AcPro	AmidNeu1AcPro	AmidPse2Ac1Lt	dOxyPse1AcGlu	dOxyPse2AcSer	AmidKDN1AmPro	dHydroNeu3MeAsn	dHydroNeu2MeGln	dHydroNeu1FoLys	Pse1Me1Fo1Am1Lt	Pse1Me1Ac1Am1Gc	OxyPse1Me2Ac1Am	dHydroPse1AmXyl	Pse1Me1Ac1FoAla	Pse2Me1Ac1FoGly	OxyPse1Me1FoPro	dHydroPse1HbSer	dHydroPse1LtThr	AmidNeu1Me2Ac1Am	dOxyNeu1Ac1AmAla	AmidNeu1Me1FoPro	AmidPse1Ac1Hb1Fo	AmidPse1Me2Ac1Gc	dOxyPse1Am1Gc1Lt	dOxyPse1Ac1Pr1Am	dOxyPse1Fo1LtAla	dOxyPse1Ac1GcAla	dOxyPse1Me1AcAsp	dOxyPse2Me1FoAsp	dOxyPse1Me1FoGlu	dOxyPse1Hb1FoGly	dOxyPse1Ac1LtGly	dOxyPse1Ac1FoThr	dAmidPse1Ac1AmAla	dHydroNeu2Me1AmSer
	22	31	7	8	0	0	521.223	9	Pse1AmAsn	HydroPseHis	dHydroNeuArg	AmidPse1AcAsn	AmidPse1AmAsp	AmidPse1FoGln	AmidPse1Me1FoAsn	AmidPse1Am1GcGly	AmidPse1Fo1AmSer
	24	35	5	6	0	1	521.231	1	dHydroPse3MeMet
	25	35	3	9	0	0	521.237	1	dHydroKDN3MeLeu
	24	35	5	8	0	0	521.249	28	Pse1AcLeu	Pse2Me1Hb1Am	Pse3Me1AcAla	Pse1Me1FoLeu	OxyPse3MePro	Pse1Me1AcVal	Pse2Me1FoVal	dOxyNeu1AmLeu	AmidNeu3MePro	dOxyPse3MeGlu	dOxyPse1GcLeu	dOxyPse1LtVal	dAmidPse1AmLeu	dHydroNeu2MeLys	dOxyNeu3Me1AmAla	dOxyNeu1Me1AmVal	AmidPse2Me1Ac1Hb	dOxyPse1Me1HbAla	dOxyPse2Me1LtAla	dOxyPse3Me1GcAla	dOxyPse2Me1HbGly	dOxyPse3Me1LtGly	dOxyPse3Me1AcSer	dOxyPse2Me1AcThr	dOxyPse3Me1FoThr	dOxyPse1Me1GcVal	dAmidPse3Me1AmAla	dAmidPse1Me1AmVal
	23	35	7	7	0	0	521.26	5	AmidPse3MeAsn	AmidPse2MeGln	AmidPse1FoLys	AmidPse2Me1AmSer	AmidPse1Me1AmThr
	22	35	9	6	0	0	521.271	1	AmidPseArg
	25	39	5	7	0	0	521.285	1	Pse3MeLeu
	24	39	7	6	0	0	521.296	1	AmidPse2MeLys
	18	21	1	15	1	0	522.065	1	dAmidKDN1Gc1PO4
	17	23	4	11	1	1	522.082	1	dHydroPse1Me1PO41SO4
	19	24	1	14	0	1	522.092	2	dAmidKDN1Me1Ac1SO4	dAmidKDN2Me1Fo1SO4
	18	24	3	13	0	1	522.103	7	Neu1Gc1SO4	KDN1SO4Gly	OxyNeu1Ac1SO4	OxyKDN1Am1SO4	AmidKDN1Gc1SO4	dAmidNeu1SO4Gly	OxyNeu1Me1Fo1SO4
	18	25	3	13	1	0	522.112	3	HydroNeu1Ac1PO4	HydroKDN1Am1PO4	HydroNeu1Me1Fo1PO4
	19	28	3	12	0	1	522.139	1	OxyNeu3Me1SO4
	23	26	2	12	0	0	522.149	5	dOxyKDN3Ac1Fo	dHydroKDN2Ac1Lt	dHydroKDN1Ac1Hb1Fo	dHydroKDN1Me2Ac1Gc	dHydroKDN1Me1Ac1Fo1Lt
	19	29	3	12	1	0	522.149	1	HydroNeu3Me1PO4
	18	28	5	11	0	1	522.151	1	HydroPse1SO4Gly
	22	26	4	11	0	0	522.16	17	dAmidKDNHis	dHydroNeu1AcAsp	dHydroNeu1FoGlu	dHydroKDN1AcAsn	dHydroKDN1AmAsp	dHydroKDN1FoGln	dHydroNeu1Pr1Fo1Am	dHydroNeu1Fo1GcAla	dHydroNeu1Me1FoAsp	dHydroNeu1Fo1LtGly	dHydroNeu1Ac1GcGly	dHydroNeu1Ac1FoSer	dHydroPse1Pr1Fo1Gc	dHydroKDN1Me1FoAsn	dHydroKDN1Am1GcGly	dHydroKDN1Fo1AmSer	dHydroNeu1Me1Fo1GcGly
	18	29	5	11	1	0	522.16	1	RedPse1PO4Gly
	24	30	2	11	0	0	522.185	1	dHydroKDN2Me1Ac1Hb
	19	32	5	10	0	1	522.187	1	RedPse1Me1Am1SO4
	22	30	6	7	0	1	522.19	1	dOxyPse1Fo1AmCys
	23	30	4	10	0	0	522.196	66	Neu1AcPro	Pse2Ac1Lt	KDN1AmPro	Neu1Me2Ac1Am	Neu1Me1FoPro	Pse1Ac1Hb1Fo	Pse1Me2Ac1Gc	OxyPse1Me3Ac	AmidNeu1Me3Ac	dOxyNeu2AcAla	dOxyNeu1GcPro	dOxyPse2Ac1Pr	AmidKDN1AcPro	dAmidNeu1AmPro	dAmidPse2AcAla	dAmidPse1GcPro	dHydroNeu1HbAla	dHydroNeu3MeAsp	dHydroNeu2MeGlu	dHydroNeu1GcVal	Pse1Me1Ac1Fo1Lt	dHydroPse1Hb1Pr	dHydroPse1AcXyl	dHydroPse1FoFuc	dHydroKDN3MeAsn	dHydroKDN2MeGln	dHydroKDN1FoLys	dOxyNeu1Hb1Fo1Am	dOxyNeu1Ac1Am1Lt	dOxyNeu1Me2AcGly	dOxyPse1Hb1Fo1Gc	dOxyPse1Ac1Gc1Lt	AmidKDN1Me2Ac1Am	dOxyKDN1Ac1AmAla	AmidKDN1Me1FoPro	dAmidPse1Hb1Fo1Am	dAmidPse1Ac1Am1Lt	dAmidPse1Me2AcGly	dHydroNeu2Me1Pr1Am	dHydroNeu1Me1LtAla	dHydroNeu2Me1GcAla
	22	30	6	9	0	0	522.207	25	Pse1AcAsn	Pse1AmAsp	Pse1FoGln	Pse1Me1FoAsn	Pse1Am1GcGly	Pse1Fo1AmSer	dHydroKDNArg	dOxyNeu1AmAsn	dOxyPse1GcAsn	AmidPse1AcAsp	AmidPse1FoGlu	dAmidPse1AmAsn	OxyPse1Fo1AmAla	OxyPse1Ac1AmGly	AmidNeu1Fo1AmAla	AmidNeu1Ac1AmGly	AmidPse1Pr1Fo1Am	AmidPse1Fo1GcAla	AmidPse1Me1FoAsp	AmidPse1Fo1LtGly	AmidPse1Ac1GcGly	AmidPse1Ac1FoSer	OxyPse1Me1Fo1AmGly	AmidNeu1Me1Fo1AmGly	AmidPse1Me1Fo1GcGly
	23	34	6	6	0	1	522.226	2	dOxyPse1AmMet	dOxyPse2Me1AmCys
	24	34	4	9	0	0	522.233	24	Neu3MePro	dOxyPse2Hb	Pse2Me1Ac1Hb	dOxyNeu1AcLeu	dOxyKDN1AmLeu	AmidKDN3MePro	dAmidPse1AcLeu	dHydroPse3MeXyl	dHydroPse2MeFuc	dHydroKDN2MeLys	dOxyNeu2Me1Hb1Am	dOxyNeu3Me1AcAla	dOxyNeu1Me1FoLeu	dOxyNeu1Me1AcVal	dOxyNeu2Me1FoVal	dOxyPse1Me1Hb1Lt	dOxyPse2Me1Hb1Gc	dOxyKDN3Me1AmAla	dOxyKDN1Me1AmVal	dAmidPse2Me1Hb1Am	dAmidPse3Me1AcAla	dAmidPse1Me1FoLeu	dAmidPse1Me1AcVal	dAmidPse2Me1FoVal
	23	34	6	8	0	0	522.244	26	Pse3MeAsn	Pse2MeGln	Pse1FoLys	Pse2Me1AmSer	Pse1Me1AmThr	OxyPse1AmVal	AmidNeu1AmVal	AmidPse1HbAla	AmidPse3MeAsp	AmidPse2MeGlu	AmidPse1GcVal	HydroPse1AmPro	OxyPse2Me1AmAla	OxyPse3Me1AmGly	AmidNeu2Me1AmAla	AmidNeu3Me1AmGly	AmidPse2Me1Pr1Am	AmidPse1Me1LtAla	AmidPse2Me1GcAla	AmidPse1Me1HbGly	AmidPse2Me1LtGly	AmidPse3Me1GcGly	AmidPse2Me1AcSer	AmidPse3Me1FoSer	AmidPse1Me1AcThr	AmidPse2Me1FoThr
	22	34	8	7	0	0	522.255	1	PseArg
	25	38	4	8	0	0	522.269	2	dOxyNeu3MeLeu	dAmidPse3MeLeu
	24	38	6	7	0	0	522.28	1	Pse2MeLys
	18	23	2	14	0	1	523.087	5	KDN1Gc1SO4	OxyKDN1Ac1SO4	dAmidNeu1Gc1SO4	dAmidKDN1SO4Gly	OxyKDN1Me1Fo1SO4
	18	24	2	14	1	0	523.096	2	HydroKDN1Ac1PO4	HydroKDN1Me1Fo1PO4
	19	27	2	13	0	1	523.123	1	OxyKDN3Me1SO4
	19	28	2	13	1	0	523.133	1	HydroKDN3Me1PO4
	18	27	4	12	0	1	523.135	2	HydroNeu1Am1SO4	HydroPse1Gc1SO4
	22	25	3	12	0	0	523.144	11	dHydroKDN1AcAsp	dHydroKDN1FoGlu	dHydroNeu1Fo1Gc1Lt	dHydroNeu1Ac1Pr1Fo	dHydroKDN1Pr1Fo1Am	dHydroKDN1Fo1GcAla	dHydroKDN1Me1FoAsp	dHydroKDN1Fo1LtGly	dHydroKDN1Ac1GcGly	dHydroKDN1Ac1FoSer	dHydroKDN1Me1Fo1GcGly
	18	28	4	12	1	0	523.144	2	RedNeu1Am1PO4	RedPse1Gc1PO4
	19	31	4	11	0	1	523.171	2	RedPse1Me1Ac1SO4	RedPse2Me1Fo1SO4
	22	29	5	8	0	1	523.174	4	dHydroPse1LtCys	dOxyPse1Ac1FoCys	dHydroNeu1Me1AmCys	dHydroPse1Me1GcCys
	23	29	3	11	0	0	523.18	44	Neu1Me3Ac	KDN1AcPro	KDN1Me2Ac1Am	KDN1Me1FoPro	dOxyNeu2Ac1Lt	AmidKDN1Me3Ac	dOxyKDN2AcAla	dOxyKDN1GcPro	dAmidNeu1AcPro	dAmidPse2Ac1Lt	dAmidKDN1AmPro	dHydroNeu1Hb1Lt	dHydroKDN1HbAla	dHydroKDN3MeAsp	dHydroKDN2MeGlu	dHydroKDN1GcVal	dOxyNeu1Ac1Hb1Fo	dOxyNeu1Me2Ac1Gc	dOxyKDN1Hb1Fo1Am	dOxyKDN1Ac1Am1Lt	dOxyKDN1Me2AcGly	dAmidNeu1Me2Ac1Am	dAmidNeu1Me1FoPro	dAmidPse1Ac1Hb1Fo	dAmidPse1Me2Ac1Gc	dHydroNeu1Me1Hb1Gc	dHydroNeu2Me1Gc1Lt	dHydroNeu2Me1Ac1Pr	dHydroKDN2Me1Pr1Am	dHydroKDN1Me1LtAla	dHydroKDN2Me1GcAla	dHydroKDN1Me1HbGly	dHydroKDN2Me1LtGly	dHydroKDN3Me1GcGly	dHydroKDN2Me1AcSer	dHydroKDN3Me1FoSer	dHydroKDN1Me1AcThr	dHydroKDN2Me1FoThr	dOxyNeu1Me1Ac1Fo1Lt	dOxyKDN1Me1Fo1Am1Lt	dOxyKDN1Me1Ac1Am1Gc
	22	29	5	10	0	0	523.191	46	Pse1AcAsp	Pse1FoGlu	Neu1Fo1AmAla	Neu1Ac1AmGly	Pse1Pr1Fo1Am	Pse1Fo1GcAla	Pse1Me1FoAsp	Pse1Fo1LtGly	Pse1Ac1GcGly	OxyPse2AcGly	Pse1Ac1FoSer	dOxyNeu1AcAsn	dOxyNeu1AmAsp	dOxyNeu1FoGln	AmidNeu2AcGly	dOxyPse1GcAsp	dOxyKDN1AmAsn	dAmidPse1AcAsn	dAmidPse1AmAsp	dAmidPse1FoGln	Neu1Me1Fo1AmGly	OxyPse1Fo1Am1Lt	OxyPse1Ac1Am1Gc	OxyPse1Ac1FoAla	Pse1Me1Fo1GcGly	dHydroPse1PrSer	AmidNeu1Fo1Am1Lt	AmidNeu1Ac1Am1Gc	AmidNeu1Ac1FoAla	dOxyNeu1Me1FoAsn	dOxyNeu1Am1GcGly	dOxyNeu1Fo1AmSer	AmidPse1Fo1Gc1Lt	AmidPse1Ac1Pr1Fo	dOxyPse1Pr1FoGly	dOxyPse1Fo1GcSer	AmidKDN1Fo1AmAla	AmidKDN1Ac1AmGly	dAmidPse1Me1FoAsn	dAmidPse1Am1GcGly	dAmidPse1Fo1AmSer
	26	29	5	7	0	0	523.207	1	dHydroPse1FoPhe
	23	33	5	7	0	1	523.21	4	dOxyPse1AcMet	dOxyPse2Me1AcCys	dOxyPse3Me1FoCys	dOxyPse1Me1FoMet
	24	33	3	10	0	0	523.217	10	KDN3MePro	dOxyKDN1AcLeu	dAmidNeu3MePro	dOxyNeu2Me1Ac1Hb	dOxyKDN2Me1Hb1Am	dOxyKDN3Me1AcAla	dOxyKDN1Me1FoLeu	dOxyKDN1Me1AcVal	dOxyKDN2Me1FoVal	dAmidPse2Me1Ac1Hb
	22	33	7	6	0	1	523.221	1	AmidPse1Me1AmCys
	23	33	5	9	0	0	523.228	62	Neu1AmVal	Pse1HbAla	Pse3MeAsp	Pse2MeGlu	Pse1GcVal	Neu2Me1AmAla	Neu3Me1AmGly	Pse2Me1Pr1Am	Pse1Me1LtAla	Pse2Me1GcAla	Pse1Me1HbGly	Pse2Me1LtGly	Pse3Me1GcGly	OxyPse1FoLeu	Pse2Me1AcSer	Pse3Me1FoSer	Pse1Me1AcThr	Pse2Me1FoThr	OxyPse1AcVal	dOxyNeu3MeAsn	dOxyNeu2MeGln	AmidNeu1FoLeu	dOxyNeu1FoLys	AmidNeu1AcVal	AmidPse1Hb1Lt	dOxyPse1AmXyl	dOxyPse1HbSer	dOxyPse1LtThr	AmidKDN1AmVal	dAmidPse3MeAsn	dAmidPse2MeGln	dAmidPse1FoLys	HydroPse1AcPro	OxyPse1Me1Hb1Am	OxyPse2Me1Am1Lt	OxyPse2Me1AcAla	OxyPse3Me1FoAla	OxyPse3Me1AcGly	OxyPse1Me1FoVal	AmidNeu1Me1Hb1Am	AmidNeu2Me1Am1Lt
	22	33	7	8	0	0	523.239	3	RedPseHis	dOxyNeuArg	dAmidPseArg
	27	33	5	6	0	0	523.243	1	dHydroPse2MePhe
	24	37	5	6	0	1	523.246	1	dOxyPse3MeMet
	25	37	3	9	0	0	523.253	1	dOxyKDN3MeLeu
	24	37	5	8	0	0	523.264	7	OxyPse2MeLeu	OxyPse3MeVal	AmidNeu2MeLeu	dOxyNeu2MeLys	AmidNeu3MeVal	dAmidPse2MeLys	HydroPse3MePro
	18	22	1	15	0	1	524.071	1	dAmidKDN1Gc1SO4
	17	25	4	11	1	1	524.098	1	dOxyPse1Me1PO41SO4
	18	26	3	13	0	1	524.119	3	HydroNeu1Ac1SO4	HydroKDN1Am1SO4	HydroNeu1Me1Fo1SO4
	22	24	2	13	0	0	524.128	2	dHydroKDN1Fo1Gc1Lt	dHydroKDN1Ac1Pr1Fo
	18	27	3	13	1	0	524.128	3	RedNeu1Ac1PO4	RedKDN1Am1PO4	RedNeu1Me1Fo1PO4
	21	27	5	9	1	0	524.155	2	dHydroPse1PO4Pro	dHydroPse1Me1Ac1Am1PO4
	19	30	3	12	0	1	524.155	1	HydroNeu3Me1SO4
	22	28	4	9	0	1	524.158	4	dHydroNeu1FoMet	dHydroNeu1Me1AcCys	dHydroNeu2Me1FoCys	dHydroKDN1Me1AmCys
	23	28	2	12	0	0	524.164	13	KDN1Me3Ac	dOxyKDN2Ac1Lt	dAmidNeu1Me3Ac	dAmidKDN1AcPro	dHydroKDN1Hb1Lt	dOxyKDN1Ac1Hb1Fo	dOxyKDN1Me2Ac1Gc	dAmidKDN1Me2Ac1Am	dAmidKDN1Me1FoPro	dHydroKDN1Me1Hb1Gc	dHydroKDN2Me1Gc1Lt	dHydroKDN2Me1Ac1Pr	dOxyKDN1Me1Ac1Fo1Lt
	19	31	3	12	1	0	524.164	1	RedNeu3Me1PO4
	18	30	5	11	0	1	524.166	1	RedPse1SO4Gly
	22	28	4	11	0	0	524.176	61	Neu2AcGly	Neu1Fo1Am1Lt	Neu1Ac1Am1Gc	OxyNeu2Ac1Am	Neu1Ac1FoAla	OxyNeu1FoPro	Pse1Fo1Gc1Lt	Pse1Ac1Pr1Fo	dHydroPse2Pr	OxyPse2Ac1Gc	KDN1Fo1AmAla	KDN1Ac1AmGly	AmidNeu2Ac1Gc	dOxyNeu1AcAsp	dOxyNeu1FoGlu	dHydroPseHexA	dOxyKDN1AcAsn	dOxyKDN1AmAsp	dOxyKDN1FoGln	AmidKDN2AcGly	dAmidPse1AcAsp	dAmidPse1FoGlu	Neu1Me1Fo1Am1Gc	dHydroNeu1PrAla	Neu1Me1Ac1FoGly	dHydroNeu1LtSer	dHydroNeu1GcThr	OxyPse1Ac1Fo1Lt	KDN1Me1Fo1AmGly	AmidNeu1Ac1Fo1Lt	dOxyNeu1Pr1Fo1Am	dOxyNeu1Fo1GcAla	dOxyNeu1Me1FoAsp	dOxyNeu1Fo1LtGly	dOxyNeu1Ac1GcGly	dOxyNeu1Ac1FoSer	dOxyPse1Pr1Fo1Gc	AmidKDN1Fo1Am1Lt	AmidKDN1Ac1Am1Gc	AmidKDN1Ac1FoAla	dOxyKDN1Me1FoAsn
	21	28	6	10	0	0	524.187	2	OxyPse1FoAsn	AmidNeu1FoAsn
	23	32	4	8	0	1	524.194	1	dHydroNeu2MeMet
	24	32	2	11	0	0	524.201	2	dAmidKDN3MePro	dOxyKDN2Me1Ac1Hb
	22	32	6	7	0	1	524.205	4	Pse1Me1AmCys	AmidPse1FoMet	AmidPse1Me1AcCys	AmidPse2Me1FoCys
	23	32	4	10	0	0	524.212	74	Neu1FoLeu	Neu1AcVal	Pse1Hb1Lt	KDN1AmVal	Neu1Me1Hb1Am	Neu2Me1Am1Lt	Neu2Me1AcAla	Neu3Me1FoAla	Neu3Me1AcGly	OxyNeu2MePro	Neu1Me1FoVal	Pse1Me1Hb1Gc	Pse2Me1Gc1Lt	Pse2Me1Ac1Pr	KDN2Me1AmAla	KDN3Me1AmGly	dOxyNeu1HbAla	dOxyNeu3MeAsp	dOxyNeu2MeGlu	dOxyNeu1GcVal	dOxyPse1Hb1Pr	dOxyPse1AcXyl	dOxyPse1FoFuc	dOxyKDN3MeAsn	dOxyKDN2MeGln	AmidKDN1FoLeu	dOxyKDN1FoLys	AmidKDN1AcVal	dAmidNeu1AmVal	HydroPse1Me3Ac	dAmidPse1HbAla	dAmidPse3MeAsp	dAmidPse2MeGlu	dAmidPse1GcVal	OxyPse1Me1Ac1Hb	OxyPse2Me1Hb1Fo	OxyPse2Me1Ac1Lt	dHydroPse1MeHex	AmidNeu1Me1Ac1Hb	AmidNeu2Me1Hb1Fo	AmidNeu2Me1Ac1Lt
	22	32	6	9	0	0	524.223	17	dOxyKDNArg	OxyPse2MeAsn	OxyPse1MeGln	OxyPse1AmThr	AmidNeu2MeAsn	AmidNeu1MeGln	AmidNeu1AmThr	AmidPse1PrAla	AmidPse1LtSer	AmidPse1GcThr	OxyPse1Me1AmSer	AmidNeu1Me1AmSer	AmidPse1Me1PrGly	AmidPse1Me1GcSer	HydroPse1Fo1AmAla	HydroPse1Ac1AmGly	HydroPse1Me1Fo1AmGly
	23	36	6	6	0	1	524.242	1	AmidPse2MeMet
	24	36	4	9	0	0	524.248	7	Neu2MeLeu	Neu3MeVal	dOxyPse3MeXyl	dOxyPse2MeFuc	AmidKDN2MeLeu	dOxyKDN2MeLys	AmidKDN3MeVal
	23	36	6	8	0	0	524.26	6	OxyPse1MeLys	RedPse1AmPro	AmidNeu1MeLys	HydroPse1AmVal	HydroPse2Me1AmAla	HydroPse3Me1AmGly
	16	20	3	13	1	1	525.045	1	dHydroNeu1PO41SO4
	16	24	5	11	1	1	525.093	1	AmidPse1PO41SO4
	18	25	2	14	0	1	525.103	2	HydroKDN1Ac1SO4	HydroKDN1Me1Fo1SO4
	18	26	2	14	1	0	525.112	2	RedKDN1Ac1PO4	RedKDN1Me1Fo1PO4
	21	26	4	10	1	0	525.139	1	dHydroPse1Me2Ac1PO4
	19	29	2	13	0	1	525.139	1	HydroKDN3Me1SO4
	22	27	3	10	0	1	525.142	3	dHydroKDN1FoMet	dHydroKDN1Me1AcCys	dHydroKDN2Me1FoCys
	23	27	1	13	0	0	525.148	1	dAmidKDN1Me3Ac
	19	30	2	13	1	0	525.149	1	RedKDN3Me1PO4
	20	26	6	9	1	0	525.15	1	dHydroPse1Am1PO4Gly
	18	29	4	12	0	1	525.15	2	RedNeu1Am1SO4	RedPse1Gc1SO4
	22	27	3	12	0	0	525.159	47	Neu2Ac1Gc	OxyNeu3Ac	KDN2AcGly	Neu1Ac1Fo1Lt	KDN1Fo1Am1Lt	KDN1Ac1Am1Gc	OxyKDN2Ac1Am	KDN1Ac1FoAla	OxyKDN1FoPro	AmidKDN2Ac1Gc	dOxyKDN1AcAsp	dOxyKDN1FoGlu	dAmidNeu2AcGly	Neu1Me1Ac1Fo1Gc	dHydroNeu1Pr1Lt	OxyNeu1Me2Ac1Fo	dHydroNeu1FoXyl	KDN1Me1Fo1Am1Gc	dHydroKDN1PrAla	KDN1Me1Ac1FoGly	dHydroKDN1LtSer	dHydroKDN1GcThr	dOxyNeu1Fo1Gc1Lt	dOxyNeu1Ac1Pr1Fo	AmidKDN1Ac1Fo1Lt	dOxyKDN1Pr1Fo1Am	dOxyKDN1Fo1GcAla	dOxyKDN1Me1FoAsp	dOxyKDN1Fo1LtGly	dOxyKDN1Ac1GcGly	dOxyKDN1Ac1FoSer	dAmidNeu1Fo1Am1Lt	dAmidNeu1Ac1Am1Gc	dAmidNeu1Ac1FoAla	dAmidPse1Fo1Gc1Lt	dAmidPse1Ac1Pr1Fo	dAmidKDN1Fo1AmAla	dAmidKDN1Ac1AmGly	dHydroNeu1Me1Pr1Gc	OxyKDN1Me1Ac1Fo1Am	dHydroKDN1Me1PrGly
	21	27	5	11	0	0	525.171	7	Neu1FoAsn	OxyPse1FoAsp	AmidNeu1FoAsp	AmidKDN1FoAsn	OxyNeu1Fo1AmGly	OxyPse1Fo1GcGly	AmidNeu1Fo1GcGly
	23	31	3	9	0	1	525.178	1	dHydroKDN2MeMet
	22	31	5	8	0	1	525.189	7	Pse1FoMet	Pse1Me1AcCys	Pse2Me1FoCys	dOxyPse1LtCys	dOxyNeu1Me1AmCys	dOxyPse1Me1GcCys	dAmidPse1Me1AmCys
	23	31	3	11	0	0	525.196	50	KDN1FoLeu	KDN1AcVal	Neu1Me1Ac1Hb	Neu2Me1Hb1Fo	Neu2Me1Ac1Lt	KDN1Me1Hb1Am	KDN2Me1Am1Lt	KDN2Me1AcAla	KDN3Me1FoAla	KDN3Me1AcGly	OxyKDN2MePro	KDN1Me1FoVal	dOxyNeu1Hb1Lt	dOxyKDN1HbAla	dOxyKDN3MeAsp	dOxyKDN2MeGlu	dOxyKDN1GcVal	dAmidNeu1FoLeu	dAmidNeu1AcVal	dAmidPse1Hb1Lt	dAmidKDN1AmVal	dHydroNeu2MeXyl	dHydroNeu1MeFuc	dOxyNeu1Me1Hb1Gc	dOxyNeu2Me1Gc1Lt	dOxyNeu2Me1Ac1Pr	AmidKDN1Me1Ac1Hb	AmidKDN2Me1Hb1Fo	AmidKDN2Me1Ac1Lt	dOxyKDN2Me1Pr1Am	dOxyKDN1Me1LtAla	dOxyKDN2Me1GcAla	dOxyKDN1Me1HbGly	dOxyKDN2Me1LtGly	dOxyKDN3Me1GcGly	dOxyKDN2Me1AcSer	dOxyKDN3Me1FoSer	dOxyKDN1Me1AcThr	dOxyKDN2Me1FoThr	dAmidNeu1Me1Hb1Am	dAmidNeu2Me1Am1Lt
	22	31	5	10	0	0	525.207	49	Neu2MeAsn	Neu1MeGln	Neu1AmThr	Pse1PrAla	Pse1LtSer	Pse1GcThr	Neu1Me1AmSer	OxyPse1LtAla	OxyPse2MeAsp	OxyPse1MeGlu	Pse1Me1PrGly	OxyPse1HbGly	Pse1Me1GcSer	OxyPse1AcThr	AmidNeu1LtAla	AmidNeu2MeAsp	AmidNeu1MeGlu	AmidNeu1HbGly	AmidNeu1AcThr	AmidPse1Pr1Lt	AmidPse1FoXyl	dOxyPse1PrSer	AmidKDN2MeAsn	AmidKDN1MeGln	AmidKDN1AmThr	HydroPse2AcGly	OxyNeu1Me1AmAla	OxyNeu2Me1AmGly	OxyPse1Me1Pr1Am	OxyPse1Me1GcAla	OxyPse1Me1LtGly	OxyPse2Me1GcGly	OxyPse1Me1AcSer	OxyPse2Me1FoSer	OxyPse1Me1FoThr	AmidNeu1Me1Pr1Am	AmidNeu1Me1GcAla	AmidNeu1Me1LtGly	AmidNeu2Me1GcGly	AmidNeu1Me1AcSer	AmidNeu2Me1FoSer
	26	31	5	7	0	0	525.222	2	dOxyPse1FoPhe	dHydroPse1MeTyr
	23	35	5	7	0	1	525.226	1	Pse2MeMet
	24	35	3	10	0	0	525.232	4	KDN2MeLeu	KDN3MeVal	dAmidNeu2MeLeu	dAmidNeu3MeVal
	23	35	5	9	0	0	525.244	18	Neu1MeLys	RedPse1AcPro	OxyPse3MeThr	AmidNeu3MeThr	AmidPse2MeXyl	AmidPse1MeFuc	AmidKDN1MeLys	dOxyPse1MeHexN	HydroPse1FoLeu	HydroPse1AcVal	RedPse1Me2Ac1Am	RedPse1Me1FoPro	HydroPse1Me1Hb1Am	HydroPse2Me1Am1Lt	HydroPse2Me1AcAla	HydroPse3Me1FoAla	HydroPse3Me1AcGly	HydroPse1Me1FoVal
	27	35	5	6	0	0	525.259	1	dOxyPse2MePhe
	24	39	5	8	0	0	525.28	3	RedPse3MePro	HydroPse2MeLeu	HydroPse3MeVal
	16	19	2	14	1	1	526.029	1	dHydroKDN1PO41SO4
	16	23	4	12	1	1	526.077	1	Pse1PO41SO4
	20	25	5	10	1	0	526.134	4	dHydroPse1Am1Gc1PO4	dHydroPse1Fo1PO4Ala	dHydroPse1Ac1PO4Gly	dHydroPse1Me1Fo1PO4Gly
	18	28	3	13	0	1	526.134	3	RedNeu1Ac1SO4	RedKDN1Am1SO4	RedNeu1Me1Fo1SO4
	21	26	4	10	0	1	526.137	1	dHydroNeu1GcCys
	22	26	2	13	0	0	526.144	19	KDN2Ac1Gc	OxyKDN3Ac	KDN1Ac1Fo1Lt	dAmidNeu2Ac1Gc	dAmidKDN2AcGly	KDN1Me1Ac1Fo1Gc	dHydroKDN1Pr1Lt	OxyKDN1Me2Ac1Fo	dHydroKDN1FoXyl	dOxyKDN1Fo1Gc1Lt	dOxyKDN1Ac1Pr1Fo	dAmidNeu1Ac1Fo1Lt	dAmidKDN1Fo1Am1Lt	dAmidKDN1Ac1Am1Gc	dAmidKDN1Ac1FoAla	dHydroKDN1Me1Pr1Gc	dAmidNeu1Me1Ac1Fo1Gc	dAmidKDN1Me1Fo1Am1Gc	dAmidKDN1Me1Ac1FoGly
	21	26	4	12	0	0	526.155	9	Neu1FoAsp	KDN1FoAsn	Neu1Fo1GcGly	AmidKDN1FoAsp	dAmidNeu1FoAsn	OxyNeu1Fo1Am1Gc	OxyNeu1Ac1FoGly	OxyKDN1Fo1AmGly	AmidKDN1Fo1GcGly
	21	28	5	9	0	1	526.161	2	dHydroPse1SO4Pro	dHydroPse1Me1Ac1Am1SO4
	21	29	5	9	1	0	526.17	5	dOxyPse1PO4Pro	dHydroPse1PO4Val	dHydroPse2Me1PO4Ala	dHydroPse3Me1PO4Gly	dOxyPse1Me1Ac1Am1PO4
	19	32	3	12	0	1	526.171	1	RedNeu3Me1SO4
	22	30	4	9	0	1	526.173	7	dOxyNeu1FoMet	dAmidPse1FoMet	dOxyNeu1Me1AcCys	dOxyNeu2Me1FoCys	dOxyKDN1Me1AmCys	dAmidPse1Me1AcCys	dAmidPse2Me1FoCys
	23	30	2	12	0	0	526.18	20	KDN1Me1Ac1Hb	KDN2Me1Hb1Fo	KDN2Me1Ac1Lt	dOxyKDN1Hb1Lt	dAmidKDN1FoLeu	dAmidKDN1AcVal	dHydroKDN2MeXyl	dHydroKDN1MeFuc	dOxyKDN1Me1Hb1Gc	dOxyKDN2Me1Gc1Lt	dOxyKDN2Me1Ac1Pr	dAmidNeu1Me1Ac1Hb	dAmidNeu2Me1Hb1Fo	dAmidNeu2Me1Ac1Lt	dAmidKDN1Me1Hb1Am	dAmidKDN2Me1Am1Lt	dAmidKDN2Me1AcAla	dAmidKDN3Me1FoAla	dAmidKDN3Me1AcGly	dAmidKDN1Me1FoVal
	21	30	6	8	0	1	526.185	3	OxyPse1AmCys	AmidNeu1AmCys	AmidPse1GcCys
	22	30	4	11	0	0	526.191	72	Neu1LtAla	Neu2MeAsp	Neu1MeGlu	Neu1HbGly	Neu1AcThr	Pse1Pr1Lt	Pse1FoXyl	KDN2MeAsn	KDN1MeGln	KDN1AmThr	dOxyPse2Pr	dOxyPseHexA	Neu1Me1Pr1Am	OxyNeu1Hb1Am	Neu1Me1GcAla	Neu1Me1LtGly	Neu2Me1GcGly	Neu1Me1AcSer	Neu2Me1FoSer	Neu1Me1FoThr	OxyNeu1FoVal	Pse1Me1Pr1Gc	OxyPse1Hb1Gc	KDN1Me1AmSer	AmidNeu1Hb1Gc	dHydroNeuHexN	dOxyNeu1PrAla	dOxyNeu1LtSer	dOxyNeu1GcThr	AmidKDN1LtAla	AmidKDN2MeAsp	AmidKDN1MeGlu	AmidKDN1HbGly	AmidKDN1AcThr	HydroNeu2Ac1Am	dAmidNeu2MeAsn	dAmidNeu1MeGln	HydroNeu1FoPro	dAmidNeu1AmThr	HydroPse2Ac1Gc	dAmidPse1PrAla
	21	30	6	10	0	0	526.202	1	HydroPse1FoAsn
	26	30	4	8	0	0	526.206	1	dHydroNeu1MePhe
	23	34	4	8	0	1	526.21	2	dOxyNeu2MeMet	dAmidPse2MeMet
	24	34	2	11	0	0	526.216	2	dAmidKDN2MeLeu	dAmidKDN3MeVal
	23	34	4	10	0	0	526.227	14	Neu3MeThr	Pse2MeXyl	Pse1MeFuc	KDN1MeLys	OxyNeu1MeLeu	OxyNeu2MeVal	RedPse1Me3Ac	dOxyPse1MeHex	AmidKDN3MeThr	dAmidNeu1MeLys	HydroNeu2MePro	HydroPse1Me1Ac1Hb	HydroPse2Me1Hb1Fo	HydroPse2Me1Ac1Lt
	24	30	8	6	0	0	526.229	1	dHydroPse1AmHis
	22	34	6	9	0	0	526.239	8	AmidPseHexN	HydroPse2MeAsn	HydroPse1MeGln	HydroPse1AmThr	RedPse1Fo1AmAla	RedPse1Ac1AmGly	HydroPse1Me1AmSer	RedPse1Me1Fo1AmGly
	26	34	6	6	0	0	526.254	1	AmidPse1MePhe
	23	38	6	8	0	0	526.275	4	RedPse1AmVal	HydroPse1MeLys	RedPse2Me1AmAla	RedPse3Me1AmGly
	16	22	3	13	1	1	527.061	2	dOxyNeu1PO41SO4	dAmidPse1PO41SO4
	20	24	4	11	1	0	527.118	5	dHydroNeu1Ac1Am1PO4	dHydroPse1Fo1Lt1PO4	dHydroPse1Ac1Gc1PO4	dHydroNeu1Me1Fo1Am1PO4	dHydroPse1Me1Fo1Gc1PO4
	18	27	2	14	0	1	527.118	2	RedKDN1Ac1SO4	RedKDN1Me1Fo1SO4
	21	25	3	11	0	1	527.121	1	dHydroKDN1GcCys
	22	25	1	14	0	0	527.128	3	dAmidKDN2Ac1Gc	dAmidKDN1Ac1Fo1Lt	dAmidKDN1Me1Ac1Fo1Gc
	21	25	3	13	0	0	527.139	8	KDN1FoAsp	KDN1Fo1GcGly	dAmidNeu1FoAsp	dAmidKDN1FoAsn	OxyNeu1Ac1Fo1Gc	OxyKDN1Fo1Am1Gc	OxyKDN1Ac1FoGly	dAmidNeu1Fo1GcGly
	21	27	4	10	0	1	527.145	1	dHydroPse1Me2Ac1SO4
	21	28	4	10	1	0	527.154	3	dOxyPse1Me2Ac1PO4	dHydroPse1Me1Hb1PO4	dHydroPse2Me1Lt1PO4
	19	31	2	13	0	1	527.155	1	RedKDN3Me1SO4
	20	27	6	9	0	1	527.156	1	dHydroPse1Am1SO4Gly
	22	29	3	10	0	1	527.157	3	dOxyKDN1FoMet	dOxyKDN1Me1AcCys	dOxyKDN2Me1FoCys
	23	29	1	13	0	0	527.164	3	dAmidKDN1Me1Ac1Hb	dAmidKDN2Me1Hb1Fo	dAmidKDN2Me1Ac1Lt
	20	28	6	9	1	0	527.165	3	AmidPse1Ac1Am1PO4	dOxyPse1Am1PO4Gly	AmidPse1Me1Fo1Am1PO4
	21	29	5	9	0	1	527.169	7	Neu1AmCys	Pse1GcCys	OxyPse1AcCys	AmidNeu1AcCys	AmidKDN1AmCys	OxyPse1Me1FoCys	AmidNeu1Me1FoCys
	22	29	3	12	0	0	527.175	67	Neu1Hb1Gc	KDN1LtAla	KDN2MeAsp	KDN1MeGlu	KDN1HbGly	KDN1AcThr	HydroNeu3Ac	Neu1Me1Gc1Lt	Neu1Me1Ac1Pr	Neu2Me1Pr1Fo	OxyNeu1Ac1Hb	dHydroNeuHex	KDN1Me1Pr1Am	OxyKDN1Hb1Am	KDN1Me1GcAla	KDN1Me1LtGly	KDN2Me1GcGly	KDN1Me1AcSer	KDN2Me1FoSer	KDN1Me1FoThr	OxyKDN1FoVal	dOxyNeu1Pr1Lt	dOxyNeu1FoXyl	AmidKDN1Hb1Gc	dHydroKDNHexN	dOxyKDN1PrAla	dOxyKDN1LtSer	dOxyKDN1GcThr	dAmidNeu1LtAla	dAmidNeu2MeAsp	dAmidNeu1MeGlu	dAmidNeu1HbGly	dAmidNeu1AcThr	dAmidPse1Pr1Lt	dAmidPse1FoXyl	HydroKDN2Ac1Am	dAmidKDN2MeAsn	dAmidKDN1MeGln	HydroKDN1FoPro	dAmidKDN1AmThr	OxyNeu1Me1Hb1Fo
	21	29	5	11	0	0	527.186	10	OxyNeuGln	OxyNeu1MeAsn	OxyNeu1AmSer	OxyPse1PrGly	OxyPse1GcSer	AmidNeu1PrGly	AmidNeu1GcSer	HydroPse1FoAsp	HydroNeu1Fo1AmGly	HydroPse1Fo1GcGly
	26	29	3	9	0	0	527.19	1	dHydroKDN1MePhe
	23	33	3	9	0	1	527.194	1	dOxyKDN2MeMet
	22	33	5	8	0	1	527.205	4	OxyPse3MeCys	OxyPse1MeMet	AmidNeu3MeCys	AmidNeu1MeMet
	23	33	3	11	0	0	527.212	11	KDN3MeThr	OxyNeu3Me1Hb	OxyKDN1MeLeu	OxyKDN2MeVal	dOxyNeu2MeXyl	dOxyNeu1MeFuc	dAmidNeu3MeThr	dAmidPse2MeXyl	dAmidPse1MeFuc	dAmidKDN1MeLys	HydroKDN2MePro
	24	29	7	7	0	0	527.213	2	dHydroPse1AcHis	dHydroPse1Me1FoHis
	22	33	5	10	0	0	527.223	23	PseHexN	OxyNeuLys	AmidPseHex	RedPse2AcGly	HydroPse1LtAla	HydroPse2MeAsp	HydroPse1MeGlu	HydroPse1HbGly	HydroPse1AcThr	RedPse1Fo1Am1Lt	RedPse1Ac1Am1Gc	RedPse1Ac1FoAla	HydroNeu1Me1AmAla	HydroNeu2Me1AmGly	HydroPse1Me1Pr1Am	HydroPse1Me1GcAla	HydroPse1Me1LtGly	HydroPse2Me1GcGly	HydroPse1Me1AcSer	HydroPse2Me1FoSer	HydroPse1Me1FoThr	RedPse1Me1Fo1Am1Gc	RedPse1Me1Ac1FoGly
	26	33	5	7	0	0	527.238	2	Pse1MePhe	dOxyPse1MeTyr
	25	33	7	6	0	0	527.249	1	dHydroPse3MeHis
	23	37	5	9	0	0	527.259	9	RedPse1FoLeu	RedPse1AcVal	HydroPse3MeThr	RedPse1Me1Hb1Am	RedPse2Me1Am1Lt	RedPse2Me1AcAla	RedPse3Me1FoAla	RedPse3Me1AcGly	RedPse1Me1FoVal
	24	41	5	8	0	0	527.295	2	RedPse2MeLeu	RedPse3MeVal
	16	21	2	14	1	1	528.045	1	dOxyKDN1PO41SO4
	20	23	3	12	1	0	528.102	4	dHydroNeu2Ac1PO4	dHydroKDN1Ac1Am1PO4	dHydroNeu1Me1Ac1Fo1PO4	dHydroKDN1Me1Fo1Am1PO4
	21	24	2	14	0	0	528.123	3	dAmidKDN1FoAsp	OxyKDN1Ac1Fo1Gc	dAmidKDN1Fo1GcGly
	20	26	5	10	0	1	528.14	4	dHydroPse1Am1Gc1SO4	dHydroPse1Fo1SO4Ala	dHydroPse1Ac1SO4Gly	dHydroPse1Me1Fo1SO4Gly
	20	27	5	10	1	0	528.15	10	Pse1Ac1Am1PO4	AmidPse2Ac1PO4	Pse1Me1Fo1Am1PO4	dHydroPse1PO4Thr	dOxyPse1Am1Gc1PO4	dOxyPse1Fo1PO4Ala	dOxyPse1Ac1PO4Gly	dHydroPse1Me1PO4Ser	AmidPse1Me1Ac1Fo1PO4	dOxyPse1Me1Fo1PO4Gly
	21	28	4	10	0	1	528.153	8	Neu1AcCys	KDN1AmCys	Neu1Me1FoCys	dOxyNeu1GcCys	AmidKDN1AcCys	dAmidNeu1AmCys	dAmidPse1GcCys	AmidKDN1Me1FoCys
	22	28	2	13	0	0	528.159	31	KDN1Hb1Gc	HydroKDN3Ac	KDN1Me1Gc1Lt	KDN1Me1Ac1Pr	KDN2Me1Pr1Fo	OxyKDN1Ac1Hb	dHydroKDNHex	dOxyKDN1Pr1Lt	dOxyKDN1FoXyl	dAmidNeu1Hb1Gc	dAmidKDN1LtAla	dAmidKDN2MeAsp	dAmidKDN1MeGlu	dAmidKDN1HbGly	dAmidKDN1AcThr	OxyKDN1Me1Hb1Fo	OxyKDN1Me1Ac1Lt	OxyKDN2Me1Fo1Lt	OxyKDN2Me1Ac1Gc	dOxyKDN1Me1Pr1Gc	dAmidNeu1Me1Gc1Lt	dAmidNeu1Me1Ac1Pr	dAmidNeu2Me1Pr1Fo	dAmidKDN1Me1Pr1Am	HydroKDN1Me2Ac1Fo	dAmidKDN1Me1GcAla	dAmidKDN1Me1LtGly	dAmidKDN2Me1GcGly	dAmidKDN1Me1AcSer	dAmidKDN2Me1FoSer	dAmidKDN1Me1FoThr
	21	28	4	12	0	0	528.17	21	OxyNeuGlu	Neu1PrGly	Neu1GcSer	OxyKDNGln	OxyNeu1Pr1Am	OxyNeu1GcAla	OxyNeu1MeAsp	OxyNeu1LtGly	OxyNeu1AcSer	OxyNeu1FoThr	OxyPse1Pr1Gc	OxyKDN1MeAsn	OxyKDN1AmSer	AmidNeu1Pr1Gc	AmidKDN1PrGly	AmidKDN1GcSer	OxyNeu1Me1GcGly	OxyNeu1Me1FoSer	HydroNeu1Fo1Am1Gc	HydroNeu1Ac1FoGly	HydroKDN1Fo1AmGly
	21	30	5	9	0	1	528.176	5	dOxyPse1SO4Pro	dHydroPse1SO4Val	dHydroPse2Me1SO4Ala	dHydroPse3Me1SO4Gly	dOxyPse1Me1Ac1Am1SO4
	25	28	4	9	0	0	528.186	1	dHydroNeuTyr
	21	31	5	9	1	0	528.186	3	dOxyPse1PO4Val	dOxyPse2Me1PO4Ala	dOxyPse3Me1PO4Gly
	22	32	4	9	0	1	528.189	4	Neu3MeCys	Neu1MeMet	AmidKDN3MeCys	AmidKDN1MeMet
	23	32	2	12	0	0	528.196	4	OxyKDN3Me1Hb	dOxyKDN2MeXyl	dOxyKDN1MeFuc	dAmidKDN3MeThr
	21	32	6	8	0	1	528.2	1	HydroPse1AmCys
	22	32	4	11	0	0	528.207	30	PseHex	OxyPseFuc	OxyKDNLys	AmidNeuFuc	dOxyNeuHexN	RedNeu2Ac1Am	RedNeu1FoPro	OxyNeu3MeSer	OxyNeu2MeThr	RedPse2Ac1Gc	OxyPse1MeXyl	dAmidPseHexN	AmidNeu1MeXyl	HydroNeu1Hb1Am	HydroNeu1FoVal	HydroPse1Hb1Gc	RedPse1Ac1Fo1Lt	HydroNeu1Me1Am1Lt	HydroNeu2Me1Am1Gc	HydroNeu1Me1AcAla	HydroNeu2Me1FoAla	HydroNeu2Me1AcGly	HydroNeu3Me1FoGly	HydroPse1Me1Gc1Lt	HydroPse1Me1Ac1Pr	HydroPse2Me1Pr1Fo	HydroKDN1Me1AmAla	HydroKDN2Me1AmGly	RedNeu1Me1Ac1Fo1Am	RedPse1Me1Ac1Fo1Gc
	21	32	6	10	0	0	528.218	1	RedPse1FoAsn
	26	32	4	8	0	0	528.222	2	dOxyNeu1MePhe	dAmidPse1MePhe
	25	32	6	7	0	0	528.233	3	AmidPseTyr	dHydroPse1Ac1AmPro	dHydroPse1Me1Fo1AmPro
	23	36	4	10	0	0	528.243	6	RedNeu2MePro	HydroNeu1MeLeu	HydroNeu2MeVal	RedPse1Me1Ac1Hb	RedPse2Me1Hb1Fo	RedPse2Me1Ac1Lt
	24	32	8	6	0	0	528.245	1	dOxyPse1AmHis
	22	36	6	9	0	0	528.254	4	RedPse2MeAsn	RedPse1MeGln	RedPse1AmThr	RedPse1Me1AmSer
	26	36	6	6	0	0	528.27	1	dHydroPse3Me1AmPro
	23	40	6	8	0	0	528.291	1	RedPse1MeLys
	20	22	2	13	1	0	529.086	2	dHydroKDN2Ac1PO4	dHydroKDN1Me1Ac1Fo1PO4
	19	22	4	12	1	0	529.097	1	dHydroNeu1Fo1PO4Gly
	20	25	4	11	0	1	529.124	5	dHydroNeu1Ac1Am1SO4	dHydroPse1Fo1Lt1SO4	dHydroPse1Ac1Gc1SO4	dHydroNeu1Me1Fo1Am1SO4	dHydroPse1Me1Fo1Gc1SO4
	20	26	4	11	1	0	529.134	12	Pse2Ac1PO4	Pse1Me1Ac1Fo1PO4	dOxyNeu1Ac1Am1PO4	dOxyPse1Fo1Lt1PO4	dOxyPse1Ac1Gc1PO4	dAmidPse1Ac1Am1PO4	dHydroNeu1Me1PO4Ala	dHydroNeu2Me1PO4Gly	dHydroPse1Me1Pr1PO4	dOxyNeu1Me1Fo1Am1PO4	dOxyPse1Me1Fo1Gc1PO4	dAmidPse1Me1Fo1Am1PO4
	21	27	3	11	0	1	529.137	6	KDN1AcCys	KDN1Me1FoCys	dOxyKDN1GcCys	dAmidNeu1AcCys	dAmidKDN1AmCys	dAmidNeu1Me1FoCys
	22	27	1	14	0	0	529.143	4	dAmidKDN1Hb1Gc	dAmidKDN1Me1Gc1Lt	dAmidKDN1Me1Ac1Pr	dAmidKDN2Me1Pr1Fo
	19	26	6	10	1	0	529.145	1	AmidPse1Fo1PO4Gly
	21	27	3	13	0	0	529.154	21	Neu1Pr1Gc	OxyKDNGlu	KDN1PrGly	KDN1GcSer	OxyNeu1Gc1Lt	OxyNeu1Ac1Pr	OxyKDN1Pr1Am	OxyKDN1GcAla	OxyKDN1MeAsp	OxyKDN1LtGly	OxyKDN1AcSer	OxyKDN1FoThr	AmidKDN1Pr1Gc	dAmidNeu1PrGly	dAmidNeu1GcSer	OxyNeu1Me1Pr1Fo	OxyKDN1Me1GcGly	OxyKDN1Me1FoSer	HydroNeu1Ac1Fo1Gc	HydroKDN1Fo1Am1Gc	HydroKDN1Ac1FoGly
	21	29	4	10	0	1	529.16	3	dOxyPse1Me2Ac1SO4	dHydroPse1Me1Hb1SO4	dHydroPse2Me1Lt1SO4
	25	27	3	10	0	0	529.17	1	dHydroKDNTyr
	21	30	4	10	1	0	529.17	2	dOxyPse1Me1Hb1PO4	dOxyPse2Me1Lt1PO4
	20	29	6	9	0	1	529.172	3	AmidPse1Ac1Am1SO4	dOxyPse1Am1SO4Gly	AmidPse1Me1Fo1Am1SO4
	22	31	3	10	0	1	529.173	4	KDN3MeCys	KDN1MeMet	dAmidNeu3MeCys	dAmidNeu1MeMet
	20	30	6	9	1	0	529.181	2	AmidPse1Me1PO4Ala	AmidPse2Me1PO4Gly
	21	31	5	9	0	1	529.184	2	HydroPse1AcCys	HydroPse1Me1FoCys
	22	31	3	12	0	0	529.191	28	NeuFuc	RedNeu3Ac	Neu1MeXyl	dOxyNeuHex	AmidKDNFuc	dAmidPseHex	dOxyKDNHexN	OxyNeu3Me1Pr	RedKDN2Ac1Am	RedKDN1FoPro	OxyKDN3MeSer	OxyKDN2MeThr	AmidKDN1MeXyl	HydroNeu1Ac1Hb	HydroKDN1Hb1Am	HydroKDN1FoVal	RedNeu1Me2Ac1Fo	HydroNeu1Me1Hb1Fo	HydroNeu1Me1Ac1Lt	HydroNeu2Me1Fo1Lt	HydroNeu2Me1Ac1Gc	HydroKDN1Me1Am1Lt	HydroKDN2Me1Am1Gc	HydroKDN1Me1AcAla	HydroKDN2Me1FoAla	HydroKDN2Me1AcGly	HydroKDN3Me1FoGly	RedKDN1Me1Ac1Fo1Am
	21	31	5	11	0	0	529.202	8	HydroNeuGln	RedPse1FoAsp	HydroNeu1MeAsn	HydroNeu1AmSer	HydroPse1PrGly	HydroPse1GcSer	RedNeu1Fo1AmGly	RedPse1Fo1GcGly
	26	31	3	9	0	0	529.206	1	dOxyKDN1MePhe
	25	31	5	8	0	0	529.217	5	PseTyr	OxyPsePhe	AmidNeuPhe	dHydroPse2AcPro	dHydroPse1Me1Ac1FoPro
	22	35	5	8	0	1	529.221	2	HydroPse3MeCys	HydroPse1MeMet
	23	35	3	11	0	0	529.227	4	RedKDN2MePro	HydroNeu3Me1Hb	HydroKDN1MeLeu	HydroKDN2MeVal
	24	31	7	7	0	0	529.229	2	dOxyPse1AcHis	dOxyPse1Me1FoHis
	22	35	5	10	0	0	529.238	15	HydroNeuLys	RedPse1LtAla	RedPse2MeAsp	RedPse1MeGlu	RedPse1HbGly	RedPse1AcThr	RedNeu1Me1AmAla	RedNeu2Me1AmGly	RedPse1Me1Pr1Am	RedPse1Me1GcAla	RedPse1Me1LtGly	RedPse2Me1GcGly	RedPse1Me1AcSer	RedPse2Me1FoSer	RedPse1Me1FoThr
	26	35	5	7	0	0	529.254	1	dHydroPse3Me1AcPro
	25	35	7	6	0	0	529.265	1	dOxyPse3MeHis
	23	39	5	9	0	0	529.275	1	RedPse3MeThr
	19	21	3	13	1	0	530.081	2	dHydroNeu1Fo1Gc1PO4	dHydroKDN1Fo1PO4Gly
	20	24	3	12	0	1	530.108	4	dHydroNeu2Ac1SO4	dHydroKDN1Ac1Am1SO4	dHydroNeu1Me1Ac1Fo1SO4	dHydroKDN1Me1Fo1Am1SO4
	19	25	5	9	1	1	530.111	1	dHydroPse1PO4Cys
	20	25	3	12	1	0	530.118	11	dOxyNeu2Ac1PO4	dAmidPse2Ac1PO4	dHydroNeu1Hb1PO4	dOxyKDN1Ac1Am1PO4	dHydroNeu1Me1Lt1PO4	dHydroNeu2Me1Gc1PO4	dHydroKDN1Me1PO4Ala	dHydroKDN2Me1PO4Gly	dOxyNeu1Me1Ac1Fo1PO4	dOxyKDN1Me1Fo1Am1PO4	dAmidPse1Me1Ac1Fo1PO4
	21	26	2	12	0	1	530.121	2	dAmidKDN1AcCys	dAmidKDN1Me1FoCys
	19	25	5	11	1	0	530.129	4	Pse1Fo1PO4Gly	OxyPse1Fo1Am1PO4	AmidNeu1Fo1Am1PO4	AmidPse1Fo1Gc1PO4
	20	26	4	11	0	1	530.132	1	OxyNeu1FoCys
	21	26	2	14	0	0	530.138	8	KDN1Pr1Gc	OxyKDN1Gc1Lt	OxyKDN1Ac1Pr	dAmidNeu1Pr1Gc	dAmidKDN1PrGly	dAmidKDN1GcSer	OxyKDN1Me1Pr1Fo	HydroKDN1Ac1Fo1Gc
	20	28	5	10	0	1	530.156	10	Pse1Ac1Am1SO4	AmidPse2Ac1SO4	Pse1Me1Fo1Am1SO4	dHydroPse1SO4Thr	dOxyPse1Am1Gc1SO4	dOxyPse1Fo1SO4Ala	dOxyPse1Ac1SO4Gly	dHydroPse1Me1SO4Ser	AmidPse1Me1Ac1Fo1SO4	dOxyPse1Me1Fo1SO4Gly
	22	30	2	11	0	1	530.157	2	dAmidKDN3MeCys	dAmidKDN1MeMet
	20	29	5	10	1	0	530.165	9	Pse1Me1PO4Ala	Pse2Me1PO4Gly	AmidPse1Hb1PO4	dOxyPse1PO4Thr	OxyPse2Me1Am1PO4	AmidNeu2Me1Am1PO4	AmidPse1Me1Lt1PO4	AmidPse2Me1Gc1PO4	dOxyPse1Me1PO4Ser
	21	30	4	10	0	1	530.168	2	OxyNeuMet	OxyNeu2MeCys
	22	30	2	13	0	0	530.175	13	KDNFuc	RedKDN3Ac	KDN1MeXyl	dOxyKDNHex	dAmidNeuFuc	OxyKDN3Me1Pr	dAmidNeu1MeXyl	HydroKDN1Ac1Hb	RedKDN1Me2Ac1Fo	HydroKDN1Me1Hb1Fo	HydroKDN1Me1Ac1Lt	HydroKDN2Me1Fo1Lt	HydroKDN2Me1Ac1Gc
	23	26	6	9	0	0	530.176	1	dHydroNeu1FoHis
	21	30	4	12	0	0	530.186	16	HydroNeuGlu	HydroKDNGln	HydroNeu1Pr1Am	HydroNeu1GcAla	HydroNeu1MeAsp	HydroNeu1LtGly	HydroNeu1AcSer	HydroNeu1FoThr	HydroPse1Pr1Gc	HydroKDN1MeAsn	HydroKDN1AmSer	RedNeu1Fo1Am1Gc	RedNeu1Ac1FoGly	RedKDN1Fo1AmGly	HydroNeu1Me1GcGly	HydroNeu1Me1FoSer
	21	32	5	9	0	1	530.192	3	dOxyPse1SO4Val	dOxyPse2Me1SO4Ala	dOxyPse3Me1SO4Gly
	25	30	4	9	0	0	530.201	4	NeuPhe	dOxyNeuTyr	AmidKDNPhe	dAmidPseTyr
	23	34	2	12	0	0	530.211	1	HydroKDN3Me1Hb
	24	30	6	8	0	0	530.212	4	dHydroNeu2MeHis	dHydroPse2Ac1AmGly	dHydroPse1Ac1Fo1AmAla	dHydroPse1Me1Ac1Fo1AmGly
	21	34	6	8	0	1	530.216	1	RedPse1AmCys
	22	34	4	11	0	0	530.222	19	HydroPseFuc	HydroKDNLys	RedNeu1Hb1Am	RedNeu1FoVal	RedPse1Hb1Gc	HydroNeu3MeSer	HydroNeu2MeThr	HydroPse1MeXyl	RedNeu1Me1Am1Lt	RedNeu2Me1Am1Gc	RedNeu1Me1AcAla	RedNeu2Me1FoAla	RedNeu2Me1AcGly	RedNeu3Me1FoGly	RedPse1Me1Gc1Lt	RedPse1Me1Ac1Pr	RedPse2Me1Pr1Fo	RedKDN1Me1AmAla	RedKDN2Me1AmGly
	23	30	8	7	0	0	530.224	1	AmidPse1FoHis
	25	34	6	7	0	0	530.249	6	dOxyPse1Ac1AmPro	dHydroPse1Fo1AmLeu	dHydroPse1Ac1AmVal	dOxyPse1Me1Fo1AmPro	dHydroPse2Me1Ac1AmAla	dHydroPse1Me1Fo1AmVal
	23	38	4	10	0	0	530.259	2	RedNeu1MeLeu	RedNeu2MeVal
	24	34	8	6	0	0	530.26	1	AmidPse2MeHis
	26	38	6	6	0	0	530.285	3	dOxyPse3Me1AmPro	dHydroPse2Me1AmLeu	dHydroPse3Me1AmVal
	19	20	2	14	1	0	531.065	1	dHydroKDN1Fo1Gc1PO4
	20	23	2	13	0	1	531.092	2	dHydroKDN2Ac1SO4	dHydroKDN1Me1Ac1Fo1SO4
	20	24	2	13	1	0	531.102	5	dOxyKDN2Ac1PO4	dHydroKDN1Hb1PO4	dHydroKDN1Me1Lt1PO4	dHydroKDN2Me1Gc1PO4	dOxyKDN1Me1Ac1Fo1PO4
	19	23	4	12	0	1	531.103	1	dHydroNeu1Fo1SO4Gly
	19	24	4	12	1	0	531.113	8	Neu1Fo1Am1PO4	Pse1Fo1Gc1PO4	dHydroNeu1PO4Ser	OxyPse1Ac1Fo1PO4	AmidNeu1Ac1Fo1PO4	dOxyNeu1Fo1PO4Gly	AmidKDN1Fo1Am1PO4	dAmidPse1Fo1PO4Gly
	20	25	3	12	0	1	531.116	1	OxyKDN1FoCys
	21	25	1	15	0	0	531.122	1	dAmidKDN1Pr1Gc
	20	27	4	11	0	1	531.14	12	Pse2Ac1SO4	Pse1Me1Ac1Fo1SO4	dOxyNeu1Ac1Am1SO4	dOxyPse1Fo1Lt1SO4	dOxyPse1Ac1Gc1SO4	dAmidPse1Ac1Am1SO4	dHydroNeu1Me1SO4Ala	dHydroNeu2Me1SO4Gly	dHydroPse1Me1Pr1SO4	dOxyNeu1Me1Fo1Am1SO4	dOxyPse1Me1Fo1Gc1SO4	dAmidPse1Me1Fo1Am1SO4
	20	28	4	11	1	0	531.149	12	Pse1Hb1PO4	Neu2Me1Am1PO4	Pse1Me1Lt1PO4	Pse2Me1Gc1PO4	OxyPse2Me1Ac1PO4	AmidNeu2Me1Ac1PO4	dOxyNeu1Me1PO4Ala	dOxyNeu2Me1PO4Gly	dOxyPse1Me1Pr1PO4	AmidKDN2Me1Am1PO4	dAmidPse1Me1PO4Ala	dAmidPse2Me1PO4Gly
	19	27	6	10	0	1	531.151	1	AmidPse1Fo1SO4Gly
	21	29	3	11	0	1	531.152	2	OxyKDNMet	OxyKDN2MeCys
	22	29	1	14	0	0	531.159	2	dAmidKDNFuc	dAmidKDN1MeXyl
	23	25	5	10	0	0	531.16	1	dHydroKDN1FoHis
	19	28	6	10	1	0	531.16	1	AmidPse1PO4Ser
	21	29	3	13	0	0	531.17	16	OxyNeuXyl	HydroKDNGlu	HydroNeu1Gc1Lt	HydroNeu1Ac1Pr	HydroKDN1Pr1Am	HydroKDN1GcAla	HydroKDN1MeAsp	HydroKDN1LtGly	HydroKDN1AcSer	HydroKDN1FoThr	RedNeu1Ac1Fo1Gc	RedKDN1Fo1Am1Gc	RedKDN1Ac1FoGly	HydroNeu1Me1Pr1Fo	HydroKDN1Me1GcGly	HydroKDN1Me1FoSer
	21	31	4	10	0	1	531.176	2	dOxyPse1Me1Hb1SO4	dOxyPse2Me1Lt1SO4
	25	29	3	10	0	0	531.185	3	KDNPhe	dOxyKDNTyr	dAmidNeuPhe
	20	31	6	9	0	1	531.187	2	AmidPse1Me1SO4Ala	AmidPse2Me1SO4Gly
	24	29	5	9	0	0	531.197	8	dHydroPse3AcGly	dHydroKDN2MeHis	dHydroNeu1Fo1AmPro	dHydroPse2Ac1Am1Gc	dHydroPse2Ac1FoAla	dHydroPse1Fo1GcPro	dHydroPse1Ac1Fo1Am1Lt	dHydroPse1Me2Ac1FoGly
	21	33	5	9	0	1	531.2	2	RedPse1AcCys	RedPse1Me1FoCys
	22	33	3	12	0	0	531.206	16	RedNeu1Ac1Hb	RedKDN1Hb1Am	RedKDN1FoVal	HydroNeu3Me1Pr	HydroKDN3MeSer	HydroKDN2MeThr	RedNeu1Me1Hb1Fo	RedNeu1Me1Ac1Lt	RedNeu2Me1Fo1Lt	RedNeu2Me1Ac1Gc	RedKDN1Me1Am1Lt	RedKDN2Me1Am1Gc	RedKDN1Me1AcAla	RedKDN2Me1FoAla	RedKDN2Me1AcGly	RedKDN3Me1FoGly
	23	29	7	8	0	0	531.208	2	Pse1FoHis	dHydroPse1Fo1AmAsn
	21	33	5	11	0	0	531.218	5	RedNeuGln	RedNeu1MeAsn	RedNeu1AmSer	RedPse1PrGly	RedPse1GcSer
	25	33	5	8	0	0	531.233	12	HydroPsePhe	dOxyPse2AcPro	dHydroPse1HbPro	dHydroPse2AcVal	dHydroNeu2Me1AmPro	dHydroPse2Me2AcAla	dHydroPse1Ac1FoLeu	dHydroPse1Me1LtPro	dHydroPse2Me1GcPro	dOxyPse1Me1Ac1FoPro	dHydroPse1Me1Ac1Hb1Am	dHydroPse1Me1Ac1FoVal
	22	37	5	8	0	1	531.236	2	RedPse3MeCys	RedPse1MeMet
	23	37	3	11	0	0	531.243	3	RedNeu3Me1Hb	RedKDN1MeLeu	RedKDN2MeVal
	24	33	7	7	0	0	531.244	4	Pse2MeHis	AmidPse1Fo1AmPro	dHydroPse2Me1AmAsn	dHydroPse1Me1AmGln
	22	37	5	10	0	0	531.254	1	RedNeuLys
	26	37	5	7	0	0	531.269	4	dOxyPse3Me1AcPro	dHydroPse2Me1AcLeu	dHydroPse3Me1FoLeu	dHydroPse3Me1AcVal
	25	37	7	6	0	0	531.28	2	AmidPse2Me1AmPro	dHydroPse1Me1AmLys
	19	22	3	13	0	1	532.087	2	dHydroNeu1Fo1Gc1SO4	dHydroKDN1Fo1SO4Gly
	19	23	3	13	1	0	532.097	9	Neu1Ac1Fo1PO4	KDN1Fo1Am1PO4	dHydroNeu1Pr1PO4	dHydroKDN1PO4Ser	dOxyNeu1Fo1Gc1PO4	AmidKDN1Ac1Fo1PO4	dOxyKDN1Fo1PO4Gly	dAmidNeu1Fo1Am1PO4	dAmidPse1Fo1Gc1PO4
	19	26	5	9	0	2	532.117	1	dHydroPse1SO4Cys
	20	26	3	12	0	1	532.124	11	dOxyNeu2Ac1SO4	dAmidPse2Ac1SO4	dHydroNeu1Hb1SO4	dOxyKDN1Ac1Am1SO4	dHydroNeu1Me1Lt1SO4	dHydroNeu2Me1Gc1SO4	dHydroKDN1Me1SO4Ala	dHydroKDN2Me1SO4Gly	dOxyNeu1Me1Ac1Fo1SO4	dOxyKDN1Me1Fo1Am1SO4	dAmidPse1Me1Ac1Fo1SO4
	19	27	5	9	1	1	532.127	1	dOxyPse1PO4Cys
	20	27	3	12	1	0	532.133	12	Neu2Me1Ac1PO4	KDN2Me1Am1PO4	dOxyNeu1Hb1PO4	dAmidPse1Hb1PO4	dOxyNeu1Me1Lt1PO4	dOxyNeu2Me1Gc1PO4	AmidKDN2Me1Ac1PO4	dOxyKDN1Me1PO4Ala	dOxyKDN2Me1PO4Gly	dAmidNeu2Me1Am1PO4	dAmidPse1Me1Lt1PO4	dAmidPse2Me1Gc1PO4
	19	26	5	11	0	1	532.135	4	Pse1Fo1SO4Gly	OxyPse1Fo1Am1SO4	AmidNeu1Fo1Am1SO4	AmidPse1Fo1Gc1SO4
	19	27	5	11	1	0	532.144	7	Pse1PO4Ser	OxyPse1PO4Ala	AmidNeu1PO4Ala	AmidPse1Pr1PO4	OxyPse1Me1PO4Gly	AmidNeu1Me1PO4Gly	HydroPse1Fo1Am1PO4
	20	28	4	11	0	1	532.148	1	HydroNeu1FoCys
	21	28	2	14	0	0	532.154	5	OxyKDNXyl	HydroKDN1Gc1Lt	HydroKDN1Ac1Pr	RedKDN1Ac1Fo1Gc	HydroKDN1Me1Pr1Fo
	25	28	2	11	0	0	532.169	1	dAmidKDNPhe
	20	30	5	10	0	1	532.171	9	Pse1Me1SO4Ala	Pse2Me1SO4Gly	AmidPse1Hb1SO4	dOxyPse1SO4Thr	OxyPse2Me1Am1SO4	AmidNeu2Me1Am1SO4	AmidPse1Me1Lt1SO4	AmidPse2Me1Gc1SO4	dOxyPse1Me1SO4Ser
	24	28	4	10	0	0	532.181	5	dHydroNeu3Ac1Am	dHydroPse3Ac1Gc	dHydroNeu1Ac1FoPro	dHydroPse2Ac1Fo1Lt	dHydroKDN1Fo1AmPro
	20	31	5	10	1	0	532.181	1	HydroPse2Me1Am1PO4
	21	32	4	10	0	1	532.184	2	HydroNeuMet	HydroNeu2MeCys
	22	32	2	13	0	0	532.19	6	RedKDN1Ac1Hb	HydroKDN3Me1Pr	RedKDN1Me1Hb1Fo	RedKDN1Me1Ac1Lt	RedKDN2Me1Fo1Lt	RedKDN2Me1Ac1Gc
	23	28	6	9	0	0	532.192	5	dOxyNeu1FoHis	dAmidPse1FoHis	dHydroPse1Ac1FoAsn	dHydroPse1Fo1AmAsp	dHydroPse1Fo1Am1GcGly
	21	32	4	12	0	0	532.202	13	RedNeuGlu	RedKDNGln	RedNeu1Pr1Am	RedNeu1GcAla	RedNeu1MeAsp	RedNeu1LtGly	RedNeu1AcSer	RedNeu1FoThr	RedPse1Pr1Gc	RedKDN1MeAsn	RedKDN1AmSer	RedNeu1Me1GcGly	RedNeu1Me1FoSer
	25	32	4	9	0	0	532.217	4	dHydroNeu2Me1AcPro	dHydroNeu3Me1FoPro	dHydroPse1Me2Ac1Hb	dHydroKDN2Me1AmPro
	23	36	2	12	0	0	532.227	1	RedKDN3Me1Hb
	24	32	6	8	0	0	532.228	23	Pse1Fo1AmPro	dOxyNeu2MeHis	AmidPse3Ac1Am	dAmidPse2MeHis	dOxyPse2Ac1AmGly	AmidPse1Ac1FoPro	dHydroPse1Am1LtAla	dHydroPse2Me1AcAsn	dHydroPse3Me1FoAsn	dHydroPse2Me1AmAsp	dHydroPse1Me1AmGlu	dHydroPse1Me1AcGln	dHydroPse2Me1FoGln	dHydroPse1Hb1AmGly	dHydroPse1Ac1AmThr	dOxyPse1Ac1Fo1AmAla	dHydroPse1Me1Am1GcAla	dHydroPse1Me1Am1LtGly	dHydroPse2Me1Am1GcGly	dHydroPse1Me1Ac1AmSer	dHydroPse2Me1Fo1AmSer	dHydroPse1Me1Fo1AmThr	dOxyPse1Me1Ac1Fo1AmGly
	22	36	4	11	0	0	532.238	5	RedPseFuc	RedKDNLys	RedNeu3MeSer	RedNeu2MeThr	RedPse1MeXyl
	23	32	8	7	0	0	532.239	1	dHydroPse1FoArg
	25	36	6	7	0	0	532.264	10	Pse2Me1AmPro	dOxyPse1Fo1AmLeu	AmidPse2Me1AcPro	AmidPse3Me1FoPro	dOxyPse1Ac1AmVal	dHydroPse1Me1AcLys	dHydroPse2Me1FoLys	dHydroPse3Me1AmThr	dOxyPse2Me1Ac1AmAla	dOxyPse1Me1Fo1AmVal
	24	36	8	6	0	0	532.276	1	dHydroPse2MeArg
	26	40	6	6	0	0	532.301	2	dOxyPse2Me1AmLeu	dOxyPse3Me1AmVal
	19	21	2	14	0	1	533.071	1	dHydroKDN1Fo1Gc1SO4
	19	22	2	14	1	0	533.081	5	KDN1Ac1Fo1PO4	dHydroKDN1Pr1PO4	dOxyKDN1Fo1Gc1PO4	dAmidNeu1Ac1Fo1PO4	dAmidKDN1Fo1Am1PO4
	20	25	2	13	0	1	533.108	5	dOxyKDN2Ac1SO4	dHydroKDN1Hb1SO4	dHydroKDN1Me1Lt1SO4	dHydroKDN2Me1Gc1SO4	dOxyKDN1Me1Ac1Fo1SO4
	20	26	2	13	1	0	533.117	6	KDN2Me1Ac1PO4	dOxyKDN1Hb1PO4	dOxyKDN1Me1Lt1PO4	dOxyKDN2Me1Gc1PO4	dAmidNeu2Me1Ac1PO4	dAmidKDN2Me1Am1PO4
	19	25	4	12	0	1	533.119	8	Neu1Fo1Am1SO4	Pse1Fo1Gc1SO4	dHydroNeu1SO4Ser	OxyPse1Ac1Fo1SO4	AmidNeu1Ac1Fo1SO4	dOxyNeu1Fo1SO4Gly	AmidKDN1Fo1Am1SO4	dAmidPse1Fo1SO4Gly
	19	26	4	12	1	0	533.129	13	Neu1PO4Ala	Pse1Pr1PO4	Neu1Me1PO4Gly	OxyPse1Lt1PO4	AmidNeu1Lt1PO4	dOxyNeu1PO4Ser	AmidKDN1PO4Ala	dAmidPse1PO4Ser	OxyNeu1Me1Am1PO4	OxyPse1Me1Gc1PO4	AmidNeu1Me1Gc1PO4	AmidKDN1Me1PO4Gly	HydroPse1Ac1Fo1PO4
	20	27	3	12	0	1	533.131	1	HydroKDN1FoCys
	20	29	4	11	0	1	533.155	12	Pse1Hb1SO4	Neu2Me1Am1SO4	Pse1Me1Lt1SO4	Pse2Me1Gc1SO4	OxyPse2Me1Ac1SO4	AmidNeu2Me1Ac1SO4	dOxyNeu1Me1SO4Ala	dOxyNeu2Me1SO4Gly	dOxyPse1Me1Pr1SO4	AmidKDN2Me1Am1SO4	dAmidPse1Me1SO4Ala	dAmidPse2Me1SO4Gly
	24	27	3	11	0	0	533.165	2	dHydroKDN3Ac1Am	dHydroKDN1Ac1FoPro
	20	30	4	11	1	0	533.165	1	HydroPse2Me1Ac1PO4
	19	29	6	10	0	1	533.167	1	AmidPse1SO4Ser
	21	31	3	11	0	1	533.168	2	HydroKDNMet	HydroKDN2MeCys
	23	27	5	10	0	0	533.176	4	dOxyKDN1FoHis	dHydroPse1Ac1FoAsp	dHydroNeu1Ac1Fo1AmGly	dHydroPse1Ac1Fo1GcGly
	21	31	3	13	0	0	533.186	13	RedKDNGlu	HydroNeuXyl	RedNeu1Gc1Lt	RedNeu1Ac1Pr	RedKDN1Pr1Am	RedKDN1GcAla	RedKDN1MeAsp	RedKDN1LtGly	RedKDN1AcSer	RedKDN1FoThr	RedNeu1Me1Pr1Fo	RedKDN1Me1GcGly	RedKDN1Me1FoSer
	25	31	3	10	0	0	533.201	2	dHydroKDN2Me1AcPro	dHydroKDN3Me1FoPro
	24	31	5	9	0	0	533.212	38	Pse3Ac1Am	Pse1Ac1FoPro	dOxyPse3AcGly	dOxyKDN2MeHis	dHydroPse1PrPro	dHydroPse2AcThr	dOxyNeu1Fo1AmPro	dOxyPse2Ac1Am1Gc	dOxyPse2Ac1FoAla	dOxyPse1Fo1GcPro	dAmidPse1Fo1AmPro	dHydroNeu1Fo1AmVal	dHydroPse1Hb1Am1Gc	dHydroPse1Hb1FoAla	dHydroPse1Ac1LtAla	dHydroPse2Me1AcAsp	dHydroPse3Me1FoAsp	dHydroPse1Me1AcGlu	dHydroPse2Me1FoGlu	dHydroPse1Ac1HbGly	dHydroPse1Me2AcSer	dHydroPse1Fo1GcVal	dOxyPse1Ac1Fo1Am1Lt	dOxyPse1Me2Ac1FoGly	dHydroNeu1Me1Ac1AmAla	dHydroNeu2Me1Fo1AmAla	dHydroNeu2Me1Ac1AmGly	dHydroPse1Me1Am1Gc1Lt	dHydroPse1Me1Ac1Pr1Am	dHydroPse1Me1Fo1LtAla	dHydroPse1Me1Ac1GcAla	dHydroPse2Me1Fo1GcAla	dHydroPse1Me1Hb1FoGly	dHydroPse1Me1Ac1LtGly	dHydroPse2Me1Fo1LtGly	dHydroPse2Me1Ac1GcGly	dHydroPse2Me1Ac1FoSer	dHydroPse1Me1Ac1FoThr
	22	35	3	12	0	0	533.222	3	RedNeu3Me1Pr	RedKDN3MeSer	RedKDN2MeThr
	23	31	7	8	0	0	533.223	4	OxyPse1MeHis	AmidNeu1MeHis	dOxyPse1Fo1AmAsn	AmidPse1Ac1Fo1AmGly
	25	35	5	8	0	0	533.249	24	RedPsePhe	Pse2Me1AcPro	Pse3Me1FoPro	dOxyPse1HbPro	dOxyPse2AcVal	dHydroPse1LtLeu	dHydroPse1HbVal	dOxyNeu2Me1AmPro	dOxyPse2Me2AcAla	dOxyPse1Ac1FoLeu	dOxyPse1Me1LtPro	dOxyPse2Me1GcPro	dAmidPse2Me1AmPro	dHydroNeu1Me1AmLeu	dHydroNeu2Me1AmVal	dHydroPse2Me1HbAla	dHydroPse3Me1LtAla	dHydroPse3Me1HbGly	dHydroPse1Me1GcLeu	dHydroPse3Me1AcThr	dHydroPse1Me1LtVal	dHydroPse2Me1GcVal	dOxyPse1Me1Ac1Hb1Am	dOxyPse1Me1Ac1FoVal
	24	35	7	7	0	0	533.26	6	dOxyPse2Me1AmAsn	dOxyPse1Me1AmGln	AmidPse1Fo1AmVal	AmidPse1Me1Ac1AmAla	AmidPse2Me1Fo1AmAla	AmidPse2Me1Ac1AmGly
	26	39	5	7	0	0	533.285	3	dOxyPse2Me1AcLeu	dOxyPse3Me1FoLeu	dOxyPse3Me1AcVal
	25	39	7	6	0	0	533.296	3	AmidPse1Me1AmLeu	dOxyPse1Me1AmLys	AmidPse2Me1AmVal
	19	21	1	15	1	0	534.065	1	dAmidKDN1Ac1Fo1PO4
	20	25	1	14	1	0	534.101	1	dAmidKDN2Me1Ac1PO4
	19	24	3	13	0	1	534.103	9	Neu1Ac1Fo1SO4	KDN1Fo1Am1SO4	dHydroNeu1Pr1SO4	dHydroKDN1SO4Ser	dOxyNeu1Fo1Gc1SO4	AmidKDN1Ac1Fo1SO4	dOxyKDN1Fo1SO4Gly	dAmidNeu1Fo1Am1SO4	dAmidPse1Fo1Gc1SO4
	19	25	3	13	1	0	534.112	14	Neu1Lt1PO4	KDN1PO4Ala	Neu1Me1Gc1PO4	KDN1Me1PO4Gly	dOxyNeu1Pr1PO4	AmidKDN1Lt1PO4	dOxyKDN1PO4Ser	dAmidNeu1PO4Ala	dAmidPse1Pr1PO4	OxyNeu1Me1Ac1PO4	OxyNeu2Me1Fo1PO4	OxyKDN1Me1Am1PO4	AmidKDN1Me1Gc1PO4	dAmidNeu1Me1PO4Gly
	19	28	5	9	0	2	534.133	1	dOxyPse1SO4Cys
	20	28	3	12	0	1	534.139	12	Neu2Me1Ac1SO4	KDN2Me1Am1SO4	dOxyNeu1Hb1SO4	dAmidPse1Hb1SO4	dOxyNeu1Me1Lt1SO4	dOxyNeu2Me1Gc1SO4	AmidKDN2Me1Ac1SO4	dOxyKDN1Me1SO4Ala	dOxyKDN2Me1SO4Gly	dAmidNeu2Me1Am1SO4	dAmidPse1Me1Lt1SO4	dAmidPse2Me1Gc1SO4
	19	28	5	11	0	1	534.151	7	Pse1SO4Ser	OxyPse1SO4Ala	AmidNeu1SO4Ala	AmidPse1Pr1SO4	OxyPse1Me1SO4Gly	AmidNeu1Me1SO4Gly	HydroPse1Fo1Am1SO4
	23	26	4	11	0	0	534.16	3	dHydroNeu2Ac1FoGly	dHydroNeu1Ac1Fo1Am1Gc	dHydroKDN1Ac1Fo1AmGly
	19	29	5	11	1	0	534.16	3	HydroPse1PO4Ala	RedPse1Fo1Am1PO4	HydroPse1Me1PO4Gly
	20	30	4	11	0	1	534.163	1	RedNeu1FoCys
	21	30	2	14	0	0	534.17	4	HydroKDNXyl	RedKDN1Gc1Lt	RedKDN1Ac1Pr	RedKDN1Me1Pr1Fo
	20	32	5	10	0	1	534.187	1	HydroPse2Me1Am1SO4
	23	30	6	7	0	1	534.19	2	dHydroPse1Ac1AmCys	dHydroPse1Me1Fo1AmCys
	24	30	4	10	0	0	534.196	25	dOxyNeu3Ac1Am	dOxyPse3Ac1Gc	dAmidPse3Ac1Am	dHydroNeu1LtPro	dOxyNeu1Ac1FoPro	dOxyPse2Ac1Fo1Lt	dOxyKDN1Fo1AmPro	dAmidPse1Ac1FoPro	dHydroNeu1Ac1Hb1Am	dHydroNeu1Me2AcAla	dHydroNeu2Me2AcGly	dHydroNeu1Me1GcPro	dHydroNeu1Ac1FoVal	dHydroPse1Hb1Fo1Lt	dHydroPse1Ac1Hb1Gc	dHydroPse1Me2Ac1Pr	dHydroKDN1Fo1AmVal	dHydroNeu1Me1Hb1Fo1Am	dHydroNeu1Me1Ac1Am1Lt	dHydroNeu2Me1Ac1FoAla	dHydroPse1Me1Hb1Fo1Gc	dHydroPse1Me1Ac1Gc1Lt	dHydroKDN1Me1Ac1AmAla	dHydroKDN2Me1Fo1AmAla	dHydroKDN2Me1Ac1AmGly
	20	33	5	10	1	0	534.197	1	RedPse2Me1Am1PO4
	21	34	4	10	0	1	534.2	2	RedNeuMet	RedNeu2MeCys
	22	34	2	13	0	0	534.206	1	RedKDN3Me1Pr
	23	30	6	9	0	0	534.207	15	Neu1MeHis	AmidKDN1MeHis	dHydroNeu1AmGln	dHydroPse1LtAsn	dHydroPse1GcGln	Pse1Ac1Fo1AmGly	dOxyPse1Ac1FoAsn	dOxyPse1Fo1AmAsp	AmidPse2Ac1FoGly	dHydroNeu1Me1AmAsn	dHydroPse1Me1GcAsn	dHydroPse1Pr1AmGly	dHydroPse1Am1GcSer	AmidPse1Ac1Fo1Am1Gc	dOxyPse1Fo1Am1GcGly
	27	30	6	6	0	0	534.223	1	dHydroPseTrp
	24	34	6	6	0	1	534.226	2	dHydroPse3Me1AmCys	dHydroPse1Me1AmMet
	25	34	4	9	0	0	534.233	14	dHydroPse1Me2Hb	dOxyNeu2Me1AcPro	dOxyNeu3Me1FoPro	dOxyPse1Me2Ac1Hb	dOxyKDN2Me1AmPro	dAmidPse2Me1AcPro	dAmidPse3Me1FoPro	dHydroNeu1Me1AcLeu	dHydroNeu2Me1FoLeu	dHydroNeu2Me1AcVal	dHydroNeu3Me1FoVal	dHydroPse2Me1Hb1Lt	dHydroKDN1Me1AmLeu	dHydroKDN2Me1AmVal
	24	34	6	8	0	0	534.244	32	Pse1Fo1AmVal	AmidPse1LtPro	dHydroNeu1AmLys	Pse1Me1Ac1AmAla	Pse2Me1Fo1AmAla	Pse2Me1Ac1AmGly	dHydroPse1GcLys	OxyPse1Me1AmPro	AmidNeu1Me1AmPro	AmidPse1Ac1Hb1Am	AmidPse1Me2AcAla	dOxyPse1Am1LtAla	dOxyPse2Me1AcAsn	dOxyPse3Me1FoAsn	dOxyPse2Me1AmAsp	dOxyPse1Me1AmGlu	dOxyPse1Me1AcGln	dOxyPse2Me1FoGln	AmidPse2Me2AcGly	dOxyPse1Hb1AmGly	AmidPse1Me1GcPro	dOxyPse1Ac1AmThr	AmidPse1Ac1FoVal	AmidPse1Me1Hb1Fo1Am	AmidPse1Me1Ac1Am1Lt	AmidPse2Me1Ac1FoAla	dOxyPse1Me1Am1GcAla	dOxyPse1Me1Am1LtGly	dOxyPse2Me1Am1GcGly	dOxyPse1Me1Ac1AmSer	dOxyPse2Me1Fo1AmSer	dOxyPse1Me1Fo1AmThr
	23	34	8	7	0	0	534.255	3	dOxyPse1FoArg	AmidPse1AmGln	AmidPse1Me1AmAsn
	25	38	6	7	0	0	534.28	9	Pse1Me1AmLeu	Pse2Me1AmVal	AmidPse1Me1AcLeu	AmidPse2Me1FoLeu	dOxyPse1Me1AcLys	dOxyPse2Me1FoLys	dOxyPse3Me1AmThr	AmidPse2Me1AcVal	AmidPse3Me1FoVal
	24	38	8	6	0	0	534.291	2	dOxyPse2MeArg	AmidPse1AmLys
							Functional modifications
													1. Obtain combinatorial space and chemical compositions for selected functional modifications			NOTES
																INPUT
																mincount = 0
																maxcount, see table on the left, for 'functional compositions'
																basemods = double 10x6, containing the chemical composition for every functional modification
																setprod = see sheet-9, box 5.
																OUTPUT
																compositions = Nx6 double, with chemical composition of every calculated combination
													2. Append combinations with further modifications (consecutively done for 'small mass shifts', 'sugar elements' and 'Amino acid elements')
																INPUT
																X_mods = Xx6 double, with chemical compositions of modifications X
																compositions = Nx6 double, with chemical composition of every calculated combination
																OUTPUT
																all_appendedcomps = Nx6 double, rows with chemical compositions of every calculated combination, which now include additional modification(s) X
							Additional small mass shifts
													3. Combine calculated combination of modifications with 3 core NUA compositions
																INPUT
																all_appendedcomps
																basecombs = double 3x6, rows containing the chemical composition of every core NUA structure
																OUTPUT
																allmasses = Nx1 double, with exact mass of every calculated combination, following inclusion of core NUA and label (DMB)
																combinations with the same mass were further combined and filtered for the mass range of 380 - 535 amu
							Sugar elements to increase mass space and mass defect
							Aminoacid elements to increase mass space and mass defect
[truncated: 34 more columns]

## Sheet: 9. ADD. SCRIPT ELEMENTS
	1. Find ulosonic acid fragment features in MS2 scans and combine															4. Create a chemical (compound) space using the predefined elemental constraints							NOTES
									NOTES														INPUT
									INPUT														chemical _filename= list of minimum/maximum element count and their masses.
									c	vector storing column names, used for indexing when accessing data
									ms2data	(MS2 peaks)x5 double, [scan number, channel, retention time, mass, intensity]
									ms1data	(MS1 peaks)x3 double, [mass, intensity, retention time]															C	H	N	O	P	S
									transitions	UA fragment feature table, supplied as .csv file														exactm	12	1.00783	14.0031	15.9949	30.9738	31.9721
									other															mincount	15	16	2	7	0	0
									fmppm	allowed mass error (ppm =15) to extract fragments														maxcount	30	35	5	15	1	1
									f1low	lower mass limit
									f1up	upper mass limit
									filename	filename of current sample
									plotting	optional plotting input (yes/no)													Nested setprod function is used to permute compositions (see below, 5.)
																							OUTPUT
																							allmasscomp: all permuted compositions combined with their exact mass
																5. Permute combinations within set ranges (setprot.m, mukhtar.ullah@informatic.uni-rostock.de)
									OUTPUT
									Combfrag = [scan number, channel, retention time, total intensity, extracted fragments]
									(identified UA fragments, one line for every MS2 scan)
	2. Determine carbon class of ulosonic fragments in MS2 scans						...continuation of script above									5. Filtering generated compositions using (realistic) elemental ratios
																							INPUT	allmasscomp (matrix output of section 4.)
									INPUT
									c = column indices of combfrag																add 5. Chemical filtering parameters
									combfrag = see above
																							OUTPUT	filteredcomp (matrix with filtered compositions)
																6. Filter for potential UA parents in MS1 scans, assign chem composition
									OUTPUT														INPUT	Combined (matrix output of section 3.)
									alldat= [Combfrag, combined number of fragments, class]															Masses filtered in section 5. are further filtered by exact decimal mass between 0.075 (lowfilt) and 0.225 (highfilt)
									(assigned class, one line for every MS2 scan)															formppm= ppm to assign chemical formula, at 5 ppm
	3. Align MS2 scans (containing UA fragments) with potential parents of neighbouring MS1 scans						...continuation of script above
									INPUT
									ms2data	(MS2 peaks)x5 double, [scan number, channel, retention time, mass, intensity]
									ms1data	(MS1 peaks)x3 double, [mass, intensity, retention time]
																							OUTPUT	matched (matrix)
																								(one line for every matched parent mass, with elemental composition and RDBE)
																7. Randomise MS1 and MS2 peak lists for validation purpose
																							INPUT	ms2data	(MS2 peaks)x5 double, [scan number, channel, retention time, mass, intensity]
																								ms1data	(MS1 peaks)x3 double, [mass, intensity, retention time]
									OUTPUT
									Combined (matrix )														OUTPUT	rms2data	(randomised MS2 peaks)x5 double, [scan number, channel, retention time, mass, intensity]
									(potential parent masses matched, one line for every MS2 scan ID)															rms1data	(randomised MS1 peaks)x3 double, [mass, intensity, retention time]
